# Supplementary material for: A quinolone N-oxide antibiotic selectively targets Neisseria gonorrhoeae via its toxin–antitoxin system
Source: Springer Nature journal article supplement (doi:10.1038/s41564-025-01968-y), 2025-04-02
Supplement: MOESM1 [file 41564_2025_1968_MOESM1_ESM.pdf]

# A quinolone *N*-oxide antibiotic selectively targets *Neisseria gonorrhoeae* via its toxin–antitoxin system

---

In the format provided by the  
authors and unedited

**Suppl. Table S1. Raw data of neisserial growth curves depicted as heat map in Fig. 1C**

The indicated *Neisseria* isolates were grown in liquid medium in the presence of 5, 10, 25, or 50  $\mu$ M of NQ, trans- $\Delta^1$ -NQ, NQNO or trans- $\Delta^1$ -NQNO respectively. Control cultures were grown in the presence of solvent (1% DMSO). Growth was monitored by OD550 readings every 30 min and quantified by the area under curve (AUC) from growth curves. The AUC was normalized to growth curves obtained in the presence of solvent (1% DMSO). The values displayed here form the basis of the heat map shown in Fig. 1C.

|                                       | NQ   |      |      |      | trans- $\Delta^1$ -NQ |      |      |      | NQNO |      |      |      | trans- $\Delta^1$ -NQNO |      |      |      |
|---------------------------------------|------|------|------|------|-----------------------|------|------|------|------|------|------|------|-------------------------|------|------|------|
|                                       | 5    | 10   | 25   | 50   | 5                     | 10   | 25   | 50   | 5    | 10   | 25   | 50   | 5                       | 10   | 25   | 50   |
| <i>Neisseria gonorrhoeae</i> _LSH1    | 0,12 | 0,12 | 0,01 | 0,08 | 0,02                  | 0,03 | 0,03 | 0,03 | 0,01 | 0,01 | 0,00 | 0,01 | 0,81                    | 0,03 | 0,01 | 0,02 |
| <i>Neisseria gonorrhoeae</i> VP1/N131 | 0,15 | 0,13 | 0,15 | 0,09 | 0,21                  | 0,10 | 0,01 | 0,01 | 0,02 | 0,00 | 0,02 | 0,00 | 0,92                    | 0,25 | 0,00 | 0,01 |
| <i>Neisseria gonorrhoeae</i> 81       | 0,04 | 0,02 | 0,00 | 0,00 | 0,05                  | 0,11 | 0,00 | 0,00 | 0,02 | 0,00 | 0,00 | 0,00 | 0,13                    | 0,05 | 0,00 | 0,00 |
| <i>Neisseria gonorrhoeae</i> MS11     | 0,09 | 0,12 | 0,08 | 0,12 | 0,13                  | 0,11 | 0,04 | 0,02 | 0,03 | 0,02 | 0,00 | 0,00 | 0,99                    | 0,67 | 0,00 | 0,00 |
| <i>Neisseria gonorrhoeae</i> 14       | 0,04 | 0,01 | 0,01 | 0,00 | 0,08                  | 0,07 | 0,05 | 0,03 | 0,01 | 0,00 | 0,00 | 0,00 | 0,05                    | 0,02 | 0,00 | 0,00 |
| <i>Neisseria lactamica</i>            | 0,24 | 0,11 | 0,04 | 0,01 | 0,13                  | 0,06 | 0,10 | 0,00 | 0,09 | 0,01 | 0,01 | 0,00 | 0,58                    | 0,19 | 0,01 | 0,00 |
| <i>Neisseria gonorrhoeae</i> 241      | 0,38 | 0,21 | 0,20 | 0,16 | 0,31                  | 0,27 | 0,20 | 0,16 | 0,10 | 0,04 | 0,02 | 0,00 | 1,00                    | 0,80 | 0,02 | 0,04 |
| <i>Neisseria gonorrhoeae</i> 11       | 0,17 | 0,08 | 0,09 | 0,10 | 0,17                  | 0,08 | 0,03 | 0,00 | 0,03 | 0,06 | 0,00 | 0,00 | 0,67                    | 0,15 | 0,01 | 0,05 |
| <i>Neisseria gonorrhoeae</i> _LSH3    | 0,62 | 0,45 | 0,24 | 0,19 | 0,68                  | 0,57 | 0,33 | 0,18 | 0,05 | 0,01 | 0,00 | 0,00 | 0,89                    | 0,39 | 0,00 | 0,04 |
| <i>Neisseria gonorrhoeae</i> _LSH2    | 0,64 | 0,47 | 0,46 | 0,34 | 0,69                  | 0,60 | 0,45 | 0,22 | 0,12 | 0,07 | 0,01 | 0,00 | 1,01                    | 0,52 | 0,03 | 0,04 |
| <i>Neisseria gonorrhoeae</i> 102      | 0,71 | 0,49 | 0,43 | 0,39 | 0,74                  | 0,79 | 0,52 | 0,51 | 0,13 | 0,07 | 0,03 | 0,04 | 1,10                    | 1,02 | 0,71 | 0,02 |
| <i>Neisseria gonorrhoeae</i> 340      | 0,29 | 0,32 | 0,22 | 0,23 | 0,39                  | 0,33 | 0,34 | 0,28 | 0,30 | 0,27 | 0,16 | 0,14 | 0,46                    | 0,35 | 0,26 | 0,19 |
| <i>Neisseria mucosa</i>               | 0,67 | 0,63 | 0,59 | 0,62 | 0,69                  | 0,63 | 0,94 | 0,47 | 0,71 | 0,67 | 0,74 | 0,67 | 0,76                    | 0,71 | 0,76 | 0,34 |
| <i>Neisseria macacae</i>              | 0,91 | 0,91 | 0,87 | 0,85 | 0,85                  | 0,85 | 0,86 | 0,87 | 0,78 | 0,74 | 0,76 | 0,75 | 0,78                    | 0,65 | 0,49 | 0,55 |
| <i>Neisseria elongata elongata</i>    | 0,88 | 0,63 | 0,69 | 0,02 | 0,80                  | 0,85 | 0,45 | 0,39 | 0,69 | 0,72 | 0,64 | 0,66 | 0,64                    | 0,51 | 0,68 | 0,36 |
| <i>Neisseria flavescens</i>           | 0,20 | 0,15 | 0,06 | 0,03 | 0,39                  | 0,40 | 0,30 | 0,23 | 0,94 | 0,92 | 0,79 | 0,52 | 1,00                    | 0,85 | 0,51 | 0,11 |
| <i>Neisseria sicca</i>                | 0,47 | 0,45 | 0,42 | 0,39 | 0,47                  | 0,51 | 0,45 | 0,44 | 0,84 | 0,79 | 0,66 | 0,60 | 0,82                    | 0,78 | 0,58 | 0,21 |
| <i>Neisseria canis</i>                | 0,83 | 0,81 | 0,81 | 0,84 | 0,90                  | 0,85 | 0,81 | 0,73 | 0,90 | 0,88 | 0,85 | 0,79 | 0,97                    | 0,99 | 0,86 | 0,78 |
| <i>Neisseria dentiae</i>              | 0,82 | 0,70 | 0,60 | 0,64 | 0,78                  | 0,75 | 0,69 | 0,66 | 0,94 | 0,91 | 0,85 | 0,83 | 0,92                    | 0,91 | 0,86 | 0,66 |
| <i>Neisseria subflava</i>             | 0,37 | 0,29 | 0,24 | 0,24 | 0,93                  | 0,54 | 0,37 | 0,14 | 1,04 | 0,95 | 0,82 | 0,86 | 1,02                    | 1,04 | 0,93 | 0,33 |
| <i>Neisseria perflava</i>             | 0,45 | 0,32 | 0,32 | 0,29 | 0,56                  | 0,59 | 0,60 | 0,59 | 0,98 | 1,02 | 0,90 | 0,75 | 1,00                    | 0,96 | 0,66 | 0,32 |
| <i>Neisseria cinerea</i>              | 0,97 | 0,92 | 0,94 | 0,81 | 1,03                  | 0,98 | 0,85 | 0,85 | 1,03 | 0,98 | 0,93 | 0,88 | 0,99                    | 0,97 | 0,90 | 0,76 |

**Suppl. Table S2. Results of genome comparison between parent *N. gonorrhoeae* MS11 strain versus NQNO-resistant strains derived from *N. gonorrhoeae* MS11**

Comparative genomics of NQNO-sensitive *N. gonorrhoeae* MS11 and NQNO-resistant MS11-R1 and MS11-R2 revealed I) genes absent; II) missense mutations found; and III) plasmids missing in both NQNO-resistant strains compared to the parent, NQNO-sensitive MS11 strain.

**I. Absent genes**

Opacity protein opa54  
IS1595 family transposase  
Peptidase C39  
Bacteriocin resistance protein  
Hypothetical protein  
IS1016 group transposase  
TypeI restriction-modification system DNA methylase  
Uncharacterized protein  
Outer membrane protein P.IIC

**II. Protein coding genes with missense mutations**

01699:hypothetical protein  
02115:hypothetical protein, phage associated  
02116:hypothetical protein  
02119 hypothetical protein  
02231:transposase

**III. Absent plasmids**

pTetM (pEP5233), conjugative, Tet resistance

**Suppl. Table S3. Origin of *Neisseria gonorrhoeae* strains used in this study**

| Name according to source | Description                   | Internal number | Source                                 | Isolation date    | Isolation site | Publication |
|--------------------------|-------------------------------|-----------------|----------------------------------------|-------------------|----------------|-------------|
| MS11                     | MS11 Opa+ (N309)              | 0009P           | Thomas F. Meyer                        |                   |                | [1]         |
|                          | MS11 Opa- (N302)              | 0002P           | Thomas F. Meyer                        |                   |                | [1]         |
|                          | MS11-R1                       | 0568P           | spontaneous NQNO-resistant             |                   |                | this study  |
|                          | MS11-R2                       | 0569P           | spontaneous NQNO-resistant             |                   |                | this study  |
|                          | MS11-R2 pTetM A               | 0566P           | pTetM conjugant of MS11-R2             |                   |                | this study  |
|                          | MS11-R2 pTetM B               | 0567P           | pTetM conjugant of MS11-R2             |                   |                | this study  |
| Ngo_LSH1                 | Clinical isolate              | 0022P           | Dermatology                            | 2002              |                |             |
| Ngo_LSH2                 | Clinical isolate              | 0023P           | Dermatology                            | 2002              |                |             |
| Ngo_LSH3                 | Clinical isolate              | 0024P           | Dermatology                            | 2002              |                |             |
| VP1/N131                 | VP1                           | 0051P           | Thomas F. Meyer                        |                   |                |             |
| NCTC13799                | Clinical isolate              | 0098P           | NCTC                                   | 2015, June, UK    | throat         |             |
| Ngo 241                  | Clinical isolate DGI          | 0341P           | Magnus Unemo                           | 2001 August       | blood          |             |
| Ngo 14                   | DGI                           | 0342P           | Magnus Unemo                           | 2003 March        | blood          |             |
| Ngo 102                  | DGI                           | 0343P           | Magnus Unemo                           | 2005 March        | blood          |             |
| Ngo 11                   | DGI                           | 0344P           | Magnus Unemo                           | 2006 January      | blood          |             |
| Ngo 81                   | DGI                           | 0346P           | Magnus Unemo                           | 2009 March        | joint fluid    |             |
| Ngo 340                  | DGI                           | 0347P           | Magnus Unemo                           | 2012 August       | joint fluid    |             |
| Ngo 316                  | Antibiotic resistant Austria  | 0348P           | Magnus Unemo                           | 2011 July         | pharyngeal     | [2]         |
| Ngo XDR                  | Opa+ isolate of Ngo 316       | 0592P           | visual selection of Ngo316             |                   |                | this study  |
| Ngo 231                  | Antibiotic resistant Slovenia | 0349P           | Magnus Unemo                           | 2011 October      | pharyngeal     | [3]         |
| WHO F                    | NCTC 13477                    | 0577P           | NCTC                                   | 1991, Canada      |                | [4]         |
| WHO G                    | NCTC 13478                    | 0578P           | NCTC                                   | 1997, Thailand    |                | [4]         |
| WHO K                    | NCTC 13479                    | 0579P           | NCTC                                   |                   |                | [4]         |
| WHO L                    | NCTC 13480                    | 0580P           | NCTC                                   | 1996, Asia        |                | [4]         |
| WHO M                    | NCTC 13481                    | 0581P           | NCTC                                   | 1992, Philippines |                | [4]         |
| WHO N                    | NCTC 13482                    | 0582P           | NCTC                                   | 2001, Australia   |                | [4]         |
| WHO O                    | NCTC 13483                    | 0583P           | NCTC                                   | 1991, Canada      |                | [4]         |
| WHO P                    | NCTC 13484                    | 0584P           | NCTC                                   |                   |                | [4]         |
| WHO P                    | WHO P TetM A                  | 0575P           | pTetM conjugant of WHO P               |                   |                | this study  |
|                          | WHO P TetM A                  | 0576P           | pTetM conjugant of WHO P               |                   |                | this study  |
|                          | WHO P $\epsilon/\zeta$        | 0743P           | pNEISS $\epsilon/1/\zeta$ transformant |                   |                | this study  |

Thomas F. Meyer, Max Planck Institute for Infection Biology, Berlin, Germany

Dermatology, Hautklinik, University of Würzburg, Würzburg, Germany

NCTC = National Collection of Type Cultures, Salisbury, United Kingdom

Magnus Unemo, Örebro University Hospital, Örebro, Sweden

- [1] Edwards M, McDade RL, Schoolnik G, Rothbard JB, Gotschlich EC (1984) Antigenic analysis of gonococcal pili using monoclonal antibodies. *J Exp Med* 160, 1782-1791.
- [2] Unemo M, Golparian D, Stary A, Eigentler A (2011) First *Neisseria gonorrhoeae* strain with resistance to cefixime causing gonorrhoea treatment failure in Austria, 2011. *Euro surveillance* 16.
- [3] Unemo M, Golparian D, Potocnik M, Jeverica S (2012) Treatment failure of pharyngeal gonorrhoea with internationally recommended first-line ceftriaxone verified in Slovenia, September 2011. *Euro surveillance* 17.
- [4] Unemo M, Fasth O, Fredlund H, Limnios A, Tapsall J (2009) Phenotypic and genetic characterization of the 2008 WHO *Neisseria gonorrhoeae* reference strain panel intended for global quality assurance and quality control of gonococcal antimicrobial resistance surveillance for public health purposes. *J Antimicrob Chemother* 63, 1142-1151.

**Suppl. Table S4. Origin of non-gonococcal bacterial strains used in this study**

| Name according to source             | Number according to source | Internal number | Source               | Publication |
|--------------------------------------|----------------------------|-----------------|----------------------|-------------|
| <i>N. mucosa</i>                     | N350                       | 0019P           | Thomas F. Meyer      | [5]         |
| <i>N. cinerea</i>                    | N340                       | 0020P           | Thomas F. Meyer      | [6]         |
| <i>N. lactamica</i>                  | N348                       | 0021P           | Thomas F. Meyer      | [6]         |
| <i>N. sicca</i>                      | N349                       | 0038P           | Thomas F. Meyer      | [6]         |
| <i>N. elongata elongata</i>          | DSM 17712                  | 0123P           | DSMZ                 | [7]         |
| <i>N. flavescens</i>                 | DSM 17633                  | 0124P           | DSMZ                 | [8]         |
| <i>N. macacae</i>                    | DSM 19175                  | 0125P           | DSMZ                 | [9]         |
| <i>N. perflava</i>                   | DSM 18009                  | 0126P           | DSMZ                 | [8]         |
| <i>N. subflava</i>                   | DSM 17610                  | 0127P           | DSMZ                 | [8]         |
| <i>Escherichia coli</i>              | EPEC                       | 0026P           | Thomas F. Meyer      |             |
| <i>Escherichia coli</i>              | Nova Blue                  | 360             | Novagen (Merck KGaA) |             |
| <i>Klebsiella pneumoniae</i>         | Strain 3091                | 0234P           | Tobias Oelschläger   |             |
| <i>Lactobacillus gasseri</i>         | DSM 20243                  | 0655P           | DSMZ                 |             |
| <i>Lactobacillus jensenii</i>        | DSM 20557                  | 0656P           | DSMZ                 |             |
| <i>Lactobacillus paragasseri</i>     | DSM 20077                  | 0657P           | DSMZ                 |             |
| <i>Lactobacillus delbrueckii</i>     | DSM 0513                   | 0658P           | DSMZ                 |             |
| <i>Lactobacillus hominis</i>         | DSM 23910                  | 0705P           | DSMZ                 |             |
| <i>Limosilactobacillus vaginalis</i> | DSM 5837                   | 0704P           | DSMZ                 |             |
| <i>P. aeruginosa</i> PAO1            | DSM 22644                  | 0498P           | DSMZ                 |             |
| <i>P. aeruginosa</i> pqsL            | PW 8104                    | 0507P           | UW Genome Sciences   | [10, 11]    |
| <i>P. aeruginosa</i> pqsH            | PW 5343                    | 0508P           | UW Genome Sciences   | [10, 11]    |
| <i>P. aeruginosa</i> pqsR            | PW 2812                    | 0514P           | UW Genome Sciences   | [10, 11]    |

DSMZ, Leibniz-Institute DSZM-German Collection of Microorganisms and Cell Cultures, Braunschweig, Germany

UW Genome Sciences, Seattle, USA

Thomas F. Meyer, Max Planck Institute for Infection Biology, Berlin, Germany

Tobias Oelschläger, Institute for Molecular Infection Biology, Julius-Maximilian-Universität Würzburg, Germany

- [5] Berger U. (1961) [Reduction of nitrate and nitrite by *Neisseria*]. *Zeitschrift für Hygiene und Infektionskrankheiten; medizinische Mikrobiologie, Immunologie und Virologie*, 148, 45-50.
- [6] Berger U. (1971) [*Neisseria mucosa* var. *heidelbergensis*]. *Zeitschrift für medizinische Mikrobiologie und Immunologie* 156, 154-158.
- [7] Bove K, Holten E (1970) *Neisseria elongata* sp. nov., a rod-shaped member of the genus *Neisseria*. Re-evaluation of cell shape as a criterion in classification. *J Gen Microbiol* 60, 67-75.
- [8] Skerman VBD, McGowan V, Sneath PHA (1980) Approved Lists of Bacterial Names, vol. 30. USA: Int J. Syst. Bacteriol.
- [9] Vedros NAH, C.; Chun, P. (1983) *Neisseria macacae* sp. nov., a new *Neisseria* species isolated from the Oropharynxes of Rhesus Monkeys (*Macaca mulatta*). *Int J Syst Bact* 33, 515-520.
- [10] Jacobs MA, Alwood A, Thaipisuttikul I, Spencer D, Haugen E, Ernst S, Will O, Kaul R, Raymond C, Levy R *et al* (2003) Comprehensive transposon mutant library of *Pseudomonas aeruginosa*. *Proc Natl Acad Sci U S A* 100, 14339-14344.
- [11] Held K, Ramage E, Jacobs M, Gallagher L, Manoil C (2012) Sequence-verified two-allele transposon mutant library for *Pseudomonas aeruginosa* PAO1. *J Bacteriol* 194, 6387-6389

**Suppl. Table S5. Overview of synthetic compound names, abbreviations and structures.**

| Name                                                    | Abbreviation               | Structure                                                                            |
|---------------------------------------------------------|----------------------------|--------------------------------------------------------------------------------------|
| 6-Chloro-2-nonylquinolin-4(1 <i>H</i> )-one             | <b>6Cl-NQ</b>              | 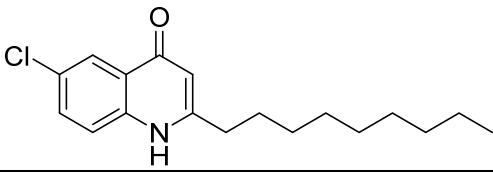   |
| 6-Bromo-2-nonylquinolin-4(1 <i>H</i> )-one              | <b>6Br-NQ</b>              |    |
| 6-Fluoro-2-nonylquinolin-4(1 <i>H</i> )-one             | <b>6F-NQ</b>               |    |
| 6-Methyl-2-nonylquinolin-4(1 <i>H</i> )-one             | <b>6Me-NQ</b>              |   |
| 6-Methoxy-2-nonylquinolin-4(1 <i>H</i> )-one            | <b>6OMe-NQ</b>             |  |
| 2-Nonyl-6-(trifluoromethyl)quinolin-4(1 <i>H</i> )-one  | <b>6CF<sub>3</sub>-NQ</b>  |  |
| 2-Nonyl-6-(trifluoromethoxy)quinolin-4(1 <i>H</i> )-one | <b>6OCF<sub>3</sub>-NQ</b> |  |
| 5-Methyl-2-nonylquinolin-4(1 <i>H</i> )-one             | <b>5Me-NQ</b>              |  |
| 7-Methyl-2-nonylquinolin-4(1 <i>H</i> )-one             | <b>7Me-NQ</b>              |  |
| 7-Fluoro-2-nonylquinolin-4(1 <i>H</i> )-one             | <b>7F-NQ</b>               |  |

|                                                       |                   |                                                                                      |
|-------------------------------------------------------|-------------------|--------------------------------------------------------------------------------------|
| 3-Methyl-2-nonylquinolin-4(1 <i>H</i> )-one           | <b>3Me-NQ</b>     | 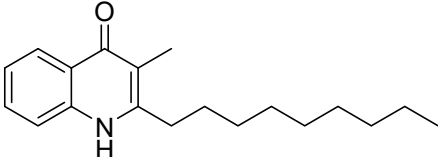   |
| 5,8-dimethyl-2-nonylquinolin-4(1 <i>H</i> )-one       | <b>5,8diMe-NQ</b> |    |
| 8-Methyl-2-nonylquinolin-4(1 <i>H</i> )-one           | <b>8Me-NQ</b>     |    |
| 8-Fluoro-2-nonylquinolin-4(1 <i>H</i> )-one           | <b>8F-NQ</b>      |    |
| 2-nonyl-1,8-naphthyridin-4(1 <i>H</i> )-one           | <b>C8Py-NQ</b>    |   |
| 6-hydroxy-2-nonylquinolin-4(1 <i>H</i> )-one          | <b>6OH-NQ</b>     |  |
| 6-Chloro-1-hydroxy-2-nonylquinolin-4(1 <i>H</i> )-one | <b>6Cl-NQNO</b>   |  |
| 6-Bromo-1-hydroxy-2-nonylquinolin-4(1 <i>H</i> )-one  | <b>6Br-NQNO</b>   |  |
| 6-Fluoro-1-hydroxy-2-nonylquinolin-4(1 <i>H</i> )-one | <b>6F-NQNO</b>    |  |
| 1-Hydroxy-6-methyl-2-nonylquinolin-4(1 <i>H</i> )-one | <b>6Me-NQNO</b>   |  |

|                                                                   |                              |                                                                                      |
|-------------------------------------------------------------------|------------------------------|--------------------------------------------------------------------------------------|
| 1-Hydroxy-6-methoxy-2-nonylquinolin-4(1 <i>H</i> )-one            | <b>6OMe-NQNO</b>             | 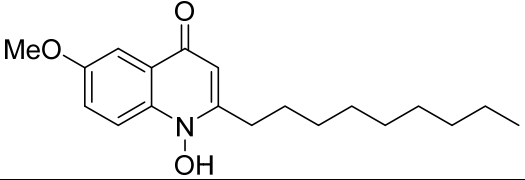   |
| 1-Hydroxy-2-nonyl-6-(trifluoromethyl)quinolin-4(1 <i>H</i> )-one  | <b>6CF<sub>3</sub>-NQNO</b>  |    |
| 1-Hydroxy-2-nonyl-6-(trifluoromethoxy)quinolin-4(1 <i>H</i> )-one | <b>6OCF<sub>3</sub>-NQNO</b> |    |
| 1-Hydroxy-5-methyl-2-nonylquinolin-4(1 <i>H</i> )-one             | <b>5Me-NQNO</b>              |    |
| 7-Fluoro-1-hydroxy-2-nonylquinolin-4(1 <i>H</i> )-one             | <b>7F-NQNO</b>               |   |
| 1-Hydroxy-3-methyl-2-nonylquinolin-4(1 <i>H</i> )-one             | <b>3Me-NQNO</b>              |  |
| 1,6-dihydroxy-2-nonylquinolin-4(1 <i>H</i> )-one                  | <b>6OH-NQNO</b>              |  |



## Supplementary Data File 1

### Synthesis, structures and NMR-based quality control of AQ compounds

#### 1. Materials and Methods

The solvents and chemicals for synthesis were purchased from Sigma-Aldrich, Acros Organics, Carl Roth, VWR Chemicals, Merck, and TCI chemicals and were used without further purification. For Silica gel chromatography, distilled technical grade solvents and silica gel 60 A (Carl Roth) was used. Thin layer chromatography (TLC) was performed using aluminium sheets “TLC Silica gel 60 F\_254” from Merck Millipore and analysed with UV light or by permanganate staining. NMR spectra were obtained with Bruker Avance-III 400 and Bruker Avance-III 600 NMR spectrometers at ambient temperature. Multiplicities are given as follows: s-singlet, d-doublet, t-triplet, q-quarter, m-multiplet. Chemical shifts ( $\delta$ ) are given in parts per million (ppm) relative to the solvent residual signal with  $\text{CDCl}_3$ -d ( $\delta_{\text{H}} = 7.26$  ppm and  $\delta_{\text{C}} = 77.16$  ppm),  $\text{DMSO}-d_6$  ( $\delta_{\text{H}} = 2.50$  ppm and  $\delta_{\text{C}} = 39.52$  ppm), or  $\text{MeOD}-d_4$  ( $\delta_{\text{H}} = 3.31$  ppm and  $\delta_{\text{C}} = 49.00$  ppm). The data obtained were processed and analysed with MestReNova 12.0 software. High resolution mass spectrometry data were obtained on an ESI-Orbitrap (Thermo Scientific, LTQ Orbitrap Velos) by direct injection and analysed with Xcalibur (Thermo Scientific) software.

#### 2. Syntheses

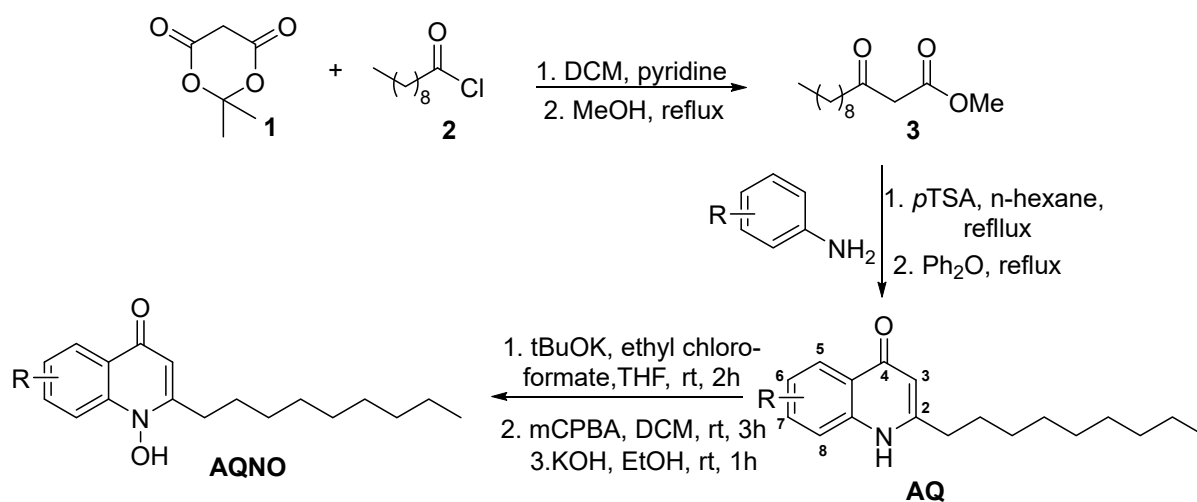

### Synthesis of methyl-3-oxododecanoate 3

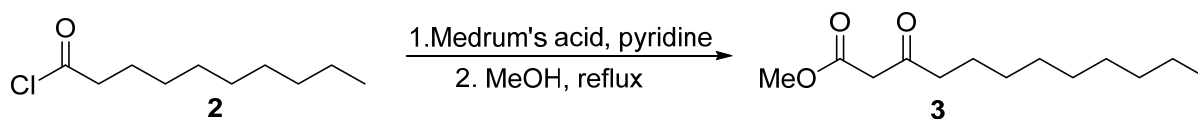

2,2-Dimethyl-1,3-dioxane-4,6-dione (Meldrum's acid) (4.45 g, 30.0 mmol, 1 eq.) was dissolved in 50 mL anhydrous DCM and cooled to 0°C. Pyridine (6.22 mL, 77.2 mmol, 2.5 eq.) was added and the reaction stirred for 30 min at 0°C. Decanoyl chloride (6.41 mL, 30.9 mmol, 1eq.) was added dropwise and the resulting orange/red solution was allowed to stir at 0°C for 1 h and at room temperature for 1 h. After the reaction time, the mixture was washed with 100 mL of 1M HCl. The layers were separated, and the aqueous phase was back-extracted three times with 20 mL of DCM. The combined organic layers were washed with 50 mL of 1M HCl followed by 30 mL of brine. The orange solution was dried over magnesium sulfate, filtered, and concentrated to give the desired adduct as an orange oil. The oil was dissolved in 50 mL of anhydrous MeOH and heated at reflux for 5 h. The solvent was evaporated, and the remaining oil was purified by column chromatography with silica gel 60 and hexane/ethyl acetate 9:1 to yield the desired product as the yellow oil.

Methyl 3-oxododecanoate **3**: 82%  $R_f$  = 0.50 (Hexane/EtOAc 8:1)

$^1\text{H}$  NMR (400 MHz,  $\text{CDCl}_3$ -*d*)  $\delta$  3.71 (s, 3H, -OCH<sub>3</sub>), 3.44 (s, 2H, -CH<sub>2</sub>-CO-), 2.50 (t,  $J$  = 7.4 Hz, 2H, -CO-CH<sub>2</sub>-), 1.63 – 1.48 (m, 2H, -CO-CH<sub>2</sub>-CH<sub>2</sub>), 1.34 – 1.15 (m, 12H, -(CH<sub>2</sub>)<sub>6</sub>CH<sub>3</sub>), 0.85 (t,  $J$  = 6.6 Hz, 3H, -CH<sub>3</sub>).

$^{13}\text{C}$  NMR (101 MHz,  $\text{CDCl}_3$ -*d*)  $\delta$  202.9 (-CO), 167.8 (-COOMe), 52.5 (-COOMe), 49.1 (COOMe-CH<sub>2</sub>-CO), 43.2 (-CO-CH<sub>2</sub>-), 32.0, 29.51, 29.5, 29.4, 29.1, 23.6, 22.8 (-(CH<sub>2</sub>)<sub>7</sub>CH<sub>3</sub>), 14.1 (-CH<sub>3</sub>).

### Synthesis of methyl 2-methyl-3-oxododecanoate

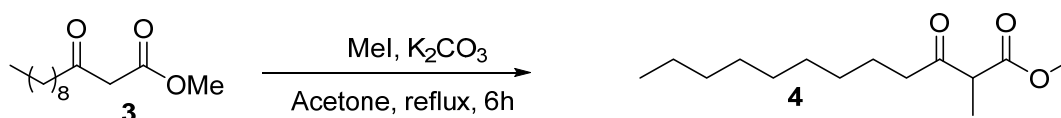

To the round-bottom flask containing dry potassium carbonate (0.969 g, 7 mmol, 2 eq.) was added a solution of methyl 3-oxododecanoate (800 mg, 3.5 mmol, 1 eq.) in acetone (12.5 mL). The resulting mixture was allowed to stir for 20 min before the addition of methyl iodide (241  $\mu\text{L}$ , 3.8 mmol, 1.1 eq.). The reaction mixture was allowed to stir under reflux for 6 h. The mixture was cooled to room temperature and the solvent was removed in vacuo to yield crude product as the colourless oil, which was used in the next step without further purification.

$^1\text{H}$  NMR (400 MHz,  $\text{CDCl}_3$ -*d*)  $\delta$  3.72 (s, 3H, -OCH<sub>3</sub>), 3.56 – 3.47 (m, 1H, -CH-CO-), 2.61 – 2.40 (m, 2H, -CO-CH<sub>2</sub>-), 1.63 – 1.52 (m, 2H, -CO-CH<sub>2</sub>-CH<sub>2</sub>), 1.37 – 1.19 (m, 15H, -(CH<sub>2</sub>)<sub>6</sub>CH<sub>3</sub>, -CO-CH(CH<sub>3</sub>)-CO-), 0.87 (t,  $J$  = 6.8 Hz, 3H, -CH<sub>3</sub>).

$^{13}\text{C}$  NMR (101 MHz,  $\text{CDCl}_3$ -*d*)  $\delta$  206.10 (-CO), 171.24 (-COOMe), 52.83 (-COOMe), 52.47 (COOMe-CH-CO), 41.53 (-CO-CH<sub>2</sub>-), 31.99, 29.55, 29.51, 29.39, 29.19, 23.68, 22.79 (-(CH<sub>2</sub>)<sub>7</sub>CH<sub>3</sub>), 14.22 (-CH<sub>3</sub>), 12.99 (-CO-CH(CH<sub>3</sub>)-CO-).

## General synthesis of quinoline-4-ones

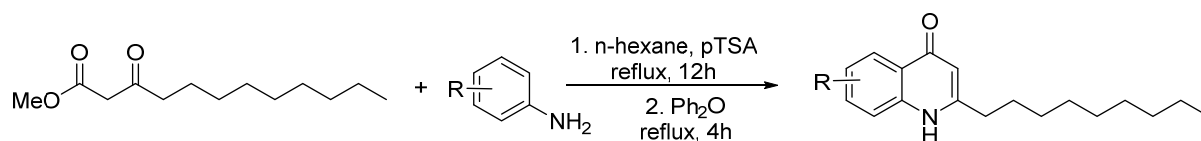

The  $\beta$ -ketoester (1 eq.) was dissolved in 20 mL anhydrous *n*-hexane with 1 eq. of aniline derivatives and 2 mol% pTSA. 2 g molecular sieve 4 Å was added and the mixture was refluxed for 12 h. After cooling down to room temperature, the reaction mixture was filtered to remove molecular sieve 4 Å, and the solvent was evaporated to give the desired product as a yellow oil. The oil was dissolved in diphenyl ether (10 mL/1 g educt) and the mixture was refluxed for 4 h. The reaction mixture was cooled to room temperature, and dropwise added to *n*-hexane. The precipitate was filtered and washed with *n*-hexane several time to obtain the desired products as the solid.

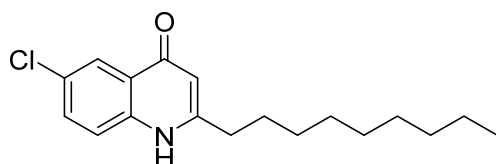

6-Chloro-2-nonylquinolin-4(1*H*)-one (**6Cl-NQ**): obtained from 4-chloroaniline and methyl-3-oxododecanoate **3** (55% over 2 steps)

$^1\text{H}$  NMR (400 MHz, DMSO- $d_6$ )  $\delta$  11.65 (s, 1H, NH), 8.03 – 7.91 (m, 1H, H-5), 7.65 (d,  $J$  = 8.8 Hz, 1H, H-7), 7.57 (d,  $J$  = 8.8 Hz, 1H, H-8), 5.97 (s, 1H, H-3), 2.59 (t,  $J$  = 7.7 Hz, 2H, H-9), 1.75 – 1.57 (m, 2H, H-10), 1.27 (d,  $J$  = 25.3 Hz, 12H, H-11-16), 0.84 (t,  $J$  = 6.7 Hz, 3H, H-17).

$^{13}\text{C}$  NMR (101 MHz, DMSO- $d_6$ )  $\delta$  175.41 (C-4), 154.18 (C-2), 138.39 (C-8a), 131.57 (C-7), 127.42 (C-6), 125.50 (C-5), 123.69 (C-4a), 120.35 (C-8), 107.82 (C-3), 33.23 (C-9), 31.22, 28.83, 28.67, 28.61, 28.45, 28.22, 22.05 (C-10-16), 13.91 (CH<sub>3</sub>).

TOF-HRMS:  $m/z$  = 306.1607 [ $\text{M}+\text{H}$ ] $^+$ , calc. for C<sub>18</sub>H<sub>24</sub>ClNO + H $^+$  = 306.1618; 328.1428 [ $\text{M}+\text{Na}$ ] $^+$ , calc. for C<sub>18</sub>H<sub>24</sub>ClNO + Na $^+$  = 328.1438

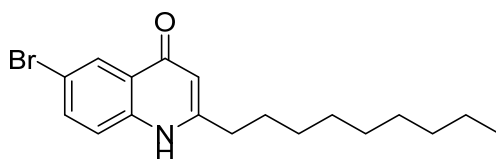

6-Bromo-2-nonylquinolin-4(1*H*)-one (**6Br-NQ**): obtained from 4-bromoaniline and methyl-3-oxododecanoate **3** (43% after 2 steps)

$^1\text{H}$  NMR (400 MHz, DMSO- $d_6$ )  $\delta$  11.63 (s, 1H, NH), 8.11 (d,  $J$  = 2.3 Hz, 1H, H-5), 7.75 (dd,  $J$  = 8.8, 2.4 Hz, 1H, H-8), 7.50 (d,  $J$  = 8.8 Hz, 1H, H-7), 5.97 (s, 1H, H-3), 2.63 – 2.54 (m, 2H, H-9), 1.65 (p,  $J$  = 7.2 Hz, 2H, H-10), 1.38-1.15 (m, 12H, H-11-16), 0.90 – 0.78 (m, 3H, H-17).

$^{13}\text{C}$  NMR (101 MHz, DMSO- $d_6$ )  $\delta$  175.4 (C-4), 154.2 (C-2), 139.0 (C-8a), 134.2 (C-7), 126.9 (C-5), 126.0 (C-4a), 120.5 (C-6), 115.4 (C-8), 107.9 (C-3), 33.2 (C-9), 31.2, 28.8, 28.7, 28.6, 28.4, 28.2, 22.0 (C-10-16), 13.9 (C-17).

TOF-HRMS:  $m/z = 350.1108$   $[M+H]^+$ , calc. for  $C_{18}H_{24}BrNO + H^+ = 350.1138$ ;  $372.0922$   $[M+Na]^+$ , calc. for  $C_{18}H_{24}BrNO + Na^+ = 372.0933$

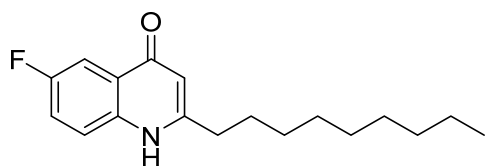

6-Fluoro-2-nonylquinolin-4(1*H*)-one (**6F-NQ**): obtained from 4-fluoroaniline and methyl-3-oxododecanoate **3** (64% over 2 steps)

$^1H$  NMR (400 MHz, DMSO- $d_6$ )  $\delta$  11.61 (s, 1H, NH), 7.67 (dd,  $J = 9.4, 3.0$  Hz, 1H, H-5), 7.60 (dd,  $J = 9.1, 4.7$  Hz, 1H, H-8), 7.52 (td,  $J = 8.6, 3.0$  Hz, 1H, H-7), 5.93 (s, 1H, H-3), 2.62 – 2.54 (m, 2H, H-9), 1.66 (p,  $J = 7.2$  Hz, 2H, H-10), 1.37 – 1.17 (m, 12H, H-11-16), 0.84 (t,  $J = 6.8$  Hz, 3H, H-17).

$^{13}C$  NMR (101 MHz, DMSO- $d_6$ )  $\delta$  175.9 (C-4), 158.1 (d,  $J = 242.2$  Hz, C-6), 153.8 (C-2), 136.8 (C-8a), 125.7d,  $J = 6.1$  Hz, C-8), 120.6 (d,  $J = 8.1$  Hz, C-4a), 120.2 (d,  $J = 26.3$  Hz, C-7), 108.7 (d,  $J = 21.2$  Hz, C-5), 106.9 (C-3), 33.2 (C-9), 31.2, 28.8, 28.7, 28.6, 28.4, 28.3, 22.0 (C-10-16), 13.9 (C-17).

TOF-HRMS:  $m/z = 290.1902$   $[M+H]^+$ , calc. for  $C_{18}H_{24}FNO + H^+ = 290.1911$ ;  $312.1719$   $[M+Na]^+$ , calc. for  $C_{18}H_{24}FNO + Na^+ = 312.1734$

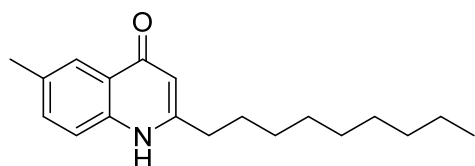

6-Methyl-2-nonylquinolin-4(1*H*)-one (**6Me-NQ**): obtained from 4-methylaniline and methyl-3-oxododecanoate **3** (54% over 2 steps)

$^1H$  NMR (400 MHz, DMSO- $d_6$ )  $\delta$  11.40 (s, 1H, NH), 7.82 (s, 1H, H-5), 7.43 (s, 2H, H-7, H-8), 5.88 (s, 1H, H-3), 2.56 (t,  $J = 7.7$  Hz, 2H, H-9), 2.38 (s, 3H, Ar-Me), 1.64 (q,  $J = 7.7$  Hz, 2H, H-10), 1.41 – 1.13 (m, 12H, H-11-16), 0.84 (t,  $J = 6.8$  Hz, 3H, H-17).

$^{13}C$  NMR (101 MHz, DMSO- $d_6$ )  $\delta$  176.50 (C-2), 153.07 (C-4), 138.17 (C-8a), 132.68 (C-6), 131.82 (C-7), 124.49 (C-4a), 123.97 (C-5), 117.74 (C-8), 107.27 (C-3), 33.17 (C-9), 31.18, 28.80, 28.64, 28.57, 28.43, 28.27, 22.00 (C-10-16), 20.64 (Ar-Me), 13.86 (C-17).

TOF-HRMS:  $m/z = 286.2154$   $[M+H]^+$ , calc. for  $C_{19}H_{27}NO + H^+ = 286.2166$ ;  $308.1970$   $[M+Na]^+$ , calc. for  $C_{19}H_{27}NO + Na^+ = 308.1985$

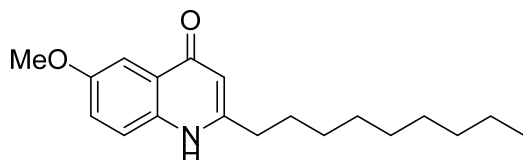

6-Methoxy-2-nonylquinolin-4(1*H*)-one (**6OMe-NQ**): obtained from 4-methoxyaniline and methyl-3-oxododecanoate **3** (68% after 2 steps)

$^1\text{H}$  NMR (400 MHz,  $\text{DMSO-}d_6$ )  $\delta$  11.43 (s, 1H, NH), 7.48 (d,  $J = 9.0$  Hz, 1H, H-5), 7.45 (d,  $J = 2.9$  Hz, 1H, H-8), 7.25 (dd,  $J = 9.0, 3.0$  Hz, 1H, H-7), 5.88 (s, 1H, H-3), 3.81 (s, 3H, Ar-OMe), 2.60 – 2.52 (m, 2H, H-9), 1.65 (p,  $J = 7.1$  Hz, 2H, H-10), 1.36 – 1.17 (m, 12H, H-11-16), 0.89 – 0.79 (m, 3H, H-17).

$^{13}\text{C}$  NMR (101 MHz,  $\text{DMSO-}d_6$ )  $\delta$  176.2 (C-4), 155.2 (C-2), 152.5 (C-6), 134.7 (C-8a), 125.6 (C-4a), 121.7 (C-7), 119.6 (C-8), 106.6 (C-5), 104.2 (C-3), 55.3 (Ar-OMe), 33.2 (C-9), 31.2, 28.8, 28.7, 28.6, 28.5, 28.4, 22.0 (C-10-16), 13.1 (C-17).

TOF-HRMS:  $m/z = 302.2101$   $[\text{M}+\text{H}]^+$ , calc. for  $\text{C}_{19}\text{H}_{27}\text{NO}_2 + \text{H}^+ = 302.2115$ ; 324.1923  $[\text{M}+\text{Na}]^+$ , calc. for  $\text{C}_{19}\text{H}_{27}\text{NO}_2 + \text{Na}^+ = 324.1934$

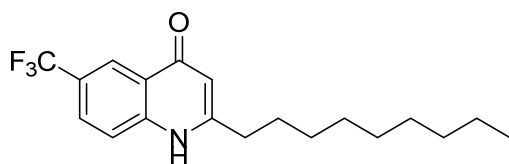

2-Nonyl-6-(trifluoromethyl)quinolin-4(1H)-one (**6CF<sub>3</sub>-NQ**): obtained from 4-(trifluoromethyl)aniline and methyl-3-oxododecanoate **3** (20% over 2 steps)

$^1\text{H}$  NMR (400 MHz,  $\text{DMSO-}d_6$ )  $\delta$  11.80 (s, 1H, NH), 8.33 – 8.27 (m, 1H, H-5), 7.91 (dd,  $J = 8.8, 2.2$  Hz, 1H, H-7), 7.72 (d,  $J = 8.7$  Hz, 1H, H-8), 6.04 (d,  $J = 1.5$  Hz, 1H, H-3), 2.65 – 2.57 (m, 2H, H-9), 1.67 (p,  $J = 7.4$  Hz, 2H, H-10), 1.40-1.15 (m, 12H, H-11-16), 0.90 – 0.78 (m, 3H, H-17).

$^{13}\text{C}$  NMR (101 MHz,  $\text{DMSO-}d_6$ )  $\delta$  176.2 (C-4), 154.8 (C-2), 142.3 (C-8a), 127.5 (C-7), 123.8 (C-5), 123.2 (C-4a), 122.9 (Ar-CF<sub>3</sub>), 122.4 (C-6), 119.5 (C-8), 108.7 (C-3), 33.2 (C-9), 31.2, 28.8, 28.7, 28.6, 28.4, 28.1, 22.0 (C-10-16), 13.9 (C-17).

TOF-HRMS:  $m/z = 340.1883$   $[\text{M}+\text{H}]^+$ , calc. for  $\text{C}_{19}\text{H}_{24}\text{F}_3\text{NO} + \text{H}^+ = 340.1871$ ; 362.1702  $[\text{M}+\text{Na}]^+$ , calc. for  $\text{C}_{19}\text{H}_{24}\text{F}_3\text{NO} + \text{Na}^+ = 362.1691$

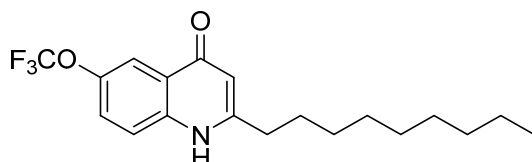

2-Nonyl-6-(trifluoromethoxy)quinolin-4(1H)-one (**6OCF<sub>3</sub>-NQ**): obtained from 4-(trifluoromethoxy)aniline and methyl-3-oxododecanoate **3** (40% over 2 steps)

$^1\text{H}$  NMR (400 MHz,  $\text{DMSO-}d_6$ )  $\delta$  11.72 (s, 1H, NH), 7.87 (s, 1H, H-5), 7.68 – 7.60 (m, 2H, H-7, H-8), 5.98 (s, 1H, H-3), 2.63 – 2.56 (m, 2H, H-9), 1.66 (p,  $J = 7.3$  Hz, 2H, H-10), 1.35-1.19 (m, 12H, H-11-16), 0.87 – 0.80 (m, 3H, H-17).

$^{13}\text{C}$  NMR (101 MHz,  $\text{DMSO-}d_6$ )  $\delta$  175.9 (C-4), 154.4 (C-2), 145.5 (C-6), 143.71 (C-4a), 138.8 (Ar-OCF<sub>3</sub>), 125.2 (C-4a), 125.1 (C-7), 120.6 (C-8), 115.8 (C-5), 107.6 (C-3), 33.2 (C-9), 31.2, 28.8, 28.7, 28.6, 28.4, 28.2, 22.0 (C-10-16), 13.9 (C-17).

TOF-HRMS:  $m/z = 356.1820$   $[\text{M}+\text{H}]^+$ , calc. for  $\text{C}_{19}\text{H}_{24}\text{F}_3\text{NO}_2 + \text{H}^+ = 356.1832$ ; 378.1639  $[\text{M}+\text{Na}]^+$ , calc. for  $\text{C}_{19}\text{H}_{24}\text{F}_3\text{NO}_2 + \text{Na}^+ = 378.1651$

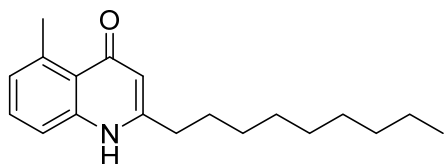

5-Methyl-2-nonylquinolin-4(1H)-one (**5Me-NQ**): obtained from 3-methylaniline and methyl-3-oxododecanoate **3** (32% over 2 steps)

$^1\text{H}$  NMR (400 MHz, DMSO- $d_6$ )  $\delta$  11.17 (s, 1H, NH), 7.42 – 7.35 (m, 1H, H-7), 7.32 (d,  $J$  = 8.1 Hz, 1H, H-8), 6.93 (d,  $J$  = 7.1 Hz, 1H, H-5), 5.80 (s, 1H, H-3), 2.77 (s, 3H, Ar-Me), 2.50 (dt,  $J$  = 4.1, 2.0 Hz, 2H, H-9 mix with DMSO), 1.63 (q,  $J$  = 6.7 Hz, 2H, H-10), 1.36-1.11 (m, 12H, H-11-16), 0.84 (t,  $J$  = 6.7 Hz, 3H, H-17).

$^{13}\text{C}$  NMR (101 MHz, DMSO- $d_6$ )  $\delta$  179.5 (C-4), 151.7 (C-2), 141.8 (C-8a), 139.0 (C-5), 130.4 (C-7), 125.0 (C-6), 122.9 (C-4a), 116.0 (C-8), 109.4 (C-3), 32.6 (C-9), 31.2, 28.9, 28.7, 28.6, 28.4, 28.1 (C-10-15), 23.1 (Ar-Me), 22.0 (C-16), 13.9 (C-17).

TOF-HRMS:  $m/z$  = 289.2156  $[\text{M}+\text{H}]^+$ , calc. for  $\text{C}_{19}\text{H}_{27}\text{NO} + \text{H}^+$  = 286.2166; 308.1972  $[\text{M}+\text{Na}]^+$ , calc. for  $\text{C}_{19}\text{H}_{27}\text{NO} + \text{Na}^+$  = 308.1985

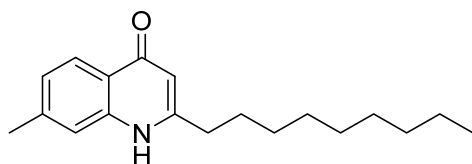

7-Methyl-2-nonylquinolin-4(1H)-one (**7Me-NQ**): obtained from 3-methylaniline and methyl-3-oxododecanoate **3** (40% over 2 steps)

$^1\text{H}$  NMR (400 MHz, DMSO- $d_6$ )  $\delta$  11.66 (s, 1H, NH), 7.90 (d,  $J$  = 8.2 Hz, 1H, H-5), 7.37 (s, 1H, H-8), 7.08 (d,  $J$  = 8.3 Hz, 1H, H-6), 5.84 (s, 1H, H-3), 2.57 (t,  $J$  = 7.6 Hz, 2H, H-9), 2.40 (s, 3H, Ar-Me), 1.65 (p,  $J$  = 6.7 Hz, 2H, H-10), 1.36 – 1.15 (m, 12H, H-11-16), 0.84 (t,  $J$  = 6.7 Hz, 3H, H-17).

$^{13}\text{C}$  NMR (101 MHz, DMSO- $d_6$ )  $\delta$  176.7 (C-4), 153.3 (C-2), 141.3 (C-8a), 140.4 (C-7), 124.7 (C-5), 124.3 (C-4a), 122.6 (C-6), 117.2 (C-8), 107.4 (C-3), 33.1 (C-9), 31.2, 28.9, 28.7, 28.6, 28.4, 28.3, 22.1 (C-10-16), 21.3 (Ar-Me), 13.9 (C-17).

TOF-HRMS:  $m/z$  = 286.2154  $[\text{M}+\text{H}]^+$ , calc. for  $\text{C}_{19}\text{H}_{27}\text{NO} + \text{H}^+$  = 286.2166; 308.1970  $[\text{M}+\text{Na}]^+$ , calc. for  $\text{C}_{19}\text{H}_{27}\text{NO} + \text{Na}^+$  = 308.1985

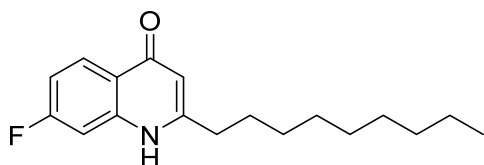

7-Fluoro-2-nonylquinolin-4(1H)-one (**7F-NQ**): obtained from 3-fluoroaniline and methyl-3-oxododecanoate **3** (41% over 2 steps)

$^1\text{H}$  NMR (400 MHz, DMSO- $d_6$ )  $\delta$  11.51 (s, 1H, NH), 8.07 (dd,  $J$  = 8.9, 6.5 Hz, 1H, H-5), 7.23 (dd,  $J$  = 10.2, 2.4 Hz, 1H, H-8), 7.12 (td,  $J$  = 8.8, 2.5 Hz, 1H, H-6), 5.91 (s, 1H, H-3), 2.60 –

2.53 (m, 2H, H-9), 1.65 (p,  $J = 7.3$  Hz, 2H, H-10), 1.37 – 1.16 (m, 12H, H-11-16), 0.89 – 0.79 (m, 3H, H-17).

$^{13}\text{C}$  NMR (101 MHz, DMSO- $d_6$ )  $\delta$  176.2 (C-4), 163.6 (d,  $J = 248.5$  Hz, C-7), 154.1 (C-2), 141.5 (d,  $J = 13.1$  Hz, C-8a), 128.1 (d,  $J = 10.1$  Hz, C-5), 121.6 (C-4a), 111.5 (d,  $J = 24.2$  Hz, C-6), 107.9 (C-3), 103.0 (d,  $J = 25.3$  Hz, C-8), 33.2 (C-9), 31.2, 28.8, 28.7, 28.6, 28.4, 28.1, 22.0 (C-10-16), 13.9 (C-17).

TOF-HRMS:  $m/z = 290.1902$   $[\text{M}+\text{H}]^+$ , calc. for  $\text{C}_{18}\text{H}_{24}\text{FNO} + \text{H}^+ = 290.1914$ ;  $312.1718$   $[\text{M}+\text{Na}]^+$ , calc. for  $\text{C}_{18}\text{H}_{24}\text{FNO} + \text{Na}^+ = 312.1734$

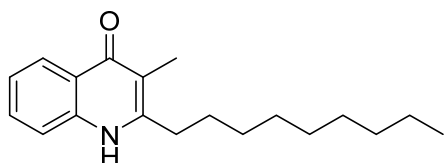

3-Methyl-2-nonylquinolin-4(1H)-one (**3Me-NQ**): obtained from aniline and methyl 2-methyl-3-oxododecanoate **4** (60% after 2 steps)

$^1\text{H}$  NMR (400 MHz,  $\text{CDCl}_3$ - $d$ )  $\delta$  11.72 (s, 1H, NH), 8.39 (d,  $J = 8.2$  Hz, 1H, H-5), 7.77 (d,  $J = 8.4$  Hz, 1H, H-7), 7.53 (t,  $J = 7.6$  Hz, 1H, H-8), 7.29 (d,  $J = 7.6$  Hz, 1H, H-6), 2.85 – 2.72 (m, 2H, H-9), 2.22 (s, 3H, - $\text{CH}_3$ ), 1.66 (p,  $J = 7.7$  Hz, 2H, H-10), 1.37-1.09 (m, 12H, H-11-16), 0.85 (t,  $J = 6.9$  Hz, 3H, H-17).

$^{13}\text{C}$  NMR (101 MHz,  $\text{CDCl}_3$ - $d$ )  $\delta$  177.8 (C-4), 151.7 (C-2), 139.7 (C-8a), 131.2 (C-7), 125.6 (C-5), 123.6 (C-4a), 123.3 (C-6), 118.3 (C-8), 115.2 (C-3), 33.0 (C-9), 32.0, 29.7, 29.6, 29.5, 29.4, 29.1, 22.8 (C-10-16), 14.2 (C-17), 11.0 ( $\text{CH}_3$ ).

TOF-HRMS:  $m/z = 286.2151$   $[\text{M}+\text{H}]^+$ , calc. for  $\text{C}_{19}\text{H}_{27}\text{NO} + \text{H}^+ = 286.2166$ ;  $308.1967$   $[\text{M}+\text{Na}]^+$ , calc. for  $\text{C}_{19}\text{H}_{27}\text{NO} + \text{Na}^+ = 308.1985$

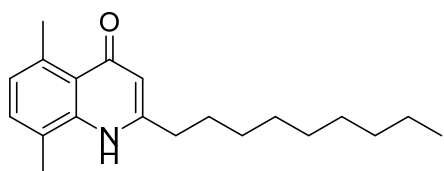

5,8-dimethyl-2-nonylquinolin-4(1H)-one (**5,8diMe-NQ**): obtained from 2,5-dimethylaniline and methyl-3-oxododecanoate **3** (70% after 2 steps)

$^1\text{H}$  NMR (400 MHz, DMSO- $d_6$ )  $\delta$  9.80 (s, 1H, NH), 7.25 (d,  $J = 7.4$  Hz, 1H, H-7), 6.85 (d,  $J = 7.4$  Hz, 1H, H-6), 5.83 (s, 1H, H-3), 2.73 (s, 3H, Ar-**Me** H-5), 2.67 – 2.56 (m, 2H, H-9), 2.44 (s, 3H, Ar-**Me**, H-8), 1.62 (p,  $J = 7.3$  Hz, 2H, H-10), 1.41-1.04 (m, 12H, H-11-16), 0.84 (t,  $J = 6.7$  Hz, 3H, H-17).

$^{13}\text{C}$  NMR (101 MHz, DMSO- $d_6$ )  $\delta$  179.8 (C-4), 152.2 (C-2), 140.2 (C-8a), 136.6 (C-5), 131.5 (C-7), 124.8 (C-8), 123.4 (C-4a), 123.1 (C-6), 109.7 (C-3), 32.4 (C-9), 31.2, 28.9, 28.8, 28.64 (2C), 28.58 (C-10-15), 23.3 (Ar-**Me** C-5), 22.0 (C-16), 17.8 (Ar-**Me** C-8), 13.9 (C-17).

TOF-HRMS:  $m/z = 300.2307$   $[\text{M}+\text{H}]^+$ , calc. for  $\text{C}_{20}\text{H}_{29}\text{NO} + \text{H}^+ = 300.2322$ ;  $322.2128$   $[\text{M}+\text{Na}]^+$ , calc. for  $\text{C}_{20}\text{H}_{29}\text{NO} + \text{Na}^+ = 322.2141$

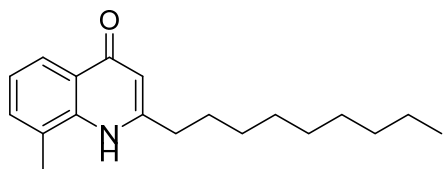

8-Methyl-2-nonylquinolin-4(1*H*)-one (**8Me-NQ**): obtained from 2-methylaniline and methyl-3-oxododecanoate **3** (67% after 2 steps)

$^1\text{H}$  NMR (400 MHz, DMSO- $d_6$ )  $\delta$  10.34 (s, 1H, NH), 7.93 (d,  $J$  = 8.0 Hz, 1H, H-5), 7.46 (d,  $J$  = 7.0 Hz, 1H, H-7), 7.18 (t,  $J$  = 7.6 Hz, 1H, H-6), 5.98 (s, 1H, H-3), 2.70 (t,  $J$  = 7.7 Hz, 2H, H-9), 2.52 (s, 3H, Ar-**Me**), 1.65 (p,  $J$  = 7.1 Hz, 2H, H-10), 1.41-1.14 (m, 12H, H-11-16), 0.84 (t,  $J$  = 6.3 Hz, 3H, H-17).

$^{13}\text{C}$  NMR (151 MHz, DMSO- $d_6$ )  $\delta$  176.8 (C-4), 154.4 (C-2), 138.8 (C-8a), 132.5 (C-7), 126.1 (C-8), 124.7 (C-4a), 122.6 (C-5), 118.6 (C-6), 107.7 (C-3), 33.0 (C-9), 31.3, 28.9 (2C), 28.8, 28.68, 28.66, 22.1 (C-10-16), 17.7 (Ar-**Me**), 13.9 (C-17).

TOF-HRMS:  $m/z$  = 286.2154  $[\text{M}+\text{H}]^+$ , calc. for  $\text{C}_{19}\text{H}_{27}\text{NO} + \text{H}^+ = 286.2166$ ; 308.1969  $[\text{M}+\text{Na}]^+$ , calc. for  $\text{C}_{19}\text{H}_{27}\text{NO} + \text{Na}^+ = 308.1985$

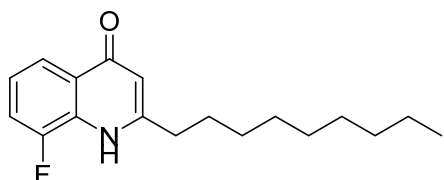

8-Fluoro-2-nonylquinolin-4(1*H*)-one (**8F-NQ**): obtained from 2-fluoroaniline and methyl-3-oxododecanoate **3** (46% over 2 steps)

$^1\text{H}$  NMR (400 MHz, DMSO- $d_6$ )  $\delta$  11.43 (s, 1H, NH), 7.85 (d,  $J$  = 8.0 Hz, 1H, H-5), 7.53 (ddd,  $J$  = 11.4, 7.9, 1.2 Hz, 1H, H-7), 7.25 (td,  $J$  = 8.0, 4.9 Hz, 1H, H-6), 5.97 (s, 1H, H-3), 2.69 – 2.59 (m, 2H, H-9), 1.64 (p,  $J$  = 7.4 Hz, 2H, H-10), 1.37 – 1.14 (m, 12H, H-11-16), 0.90 – 0.78 (m, 3H, H-17).

$^{13}\text{C}$  NMR (101 MHz, DMSO- $d_6$ )  $\delta$  175.9 (C-4), 154.4 (C-2), 151.5 (d,  $J$  = 249.5 Hz, C-8), 129.4 (d,  $J$  = 13.1 Hz, C-8a), 126.8 (C-4a), 122.3 (d,  $J$  = 7.1 Hz, C-6), 120.5 (d,  $J$  = 3.0 Hz, C-5), 116.1 (d,  $J$  = 17.2 Hz, C-7), 108.4 (C-3), 32.8 (C-9), 31.2, 28.9, 28.7, 28.7, 28.6, 28.5, 22.1 (C-10-16), 13.9 (C-17).

TOF-HRMS:  $m/z$  = 290.1902  $[\text{M}+\text{H}]^+$ , calc. for  $\text{C}_{18}\text{H}_{24}\text{FNO} + \text{H}^+ = 290.1914$ ; 312.1718  $[\text{M}+\text{Na}]^+$ , calc. for  $\text{C}_{18}\text{H}_{24}\text{FNO} + \text{Na}^+ = 312.1734$



## Syntheses of 2-nonyl-1,8-naphthyridin-4(1H)-one (C8Py-NQ)

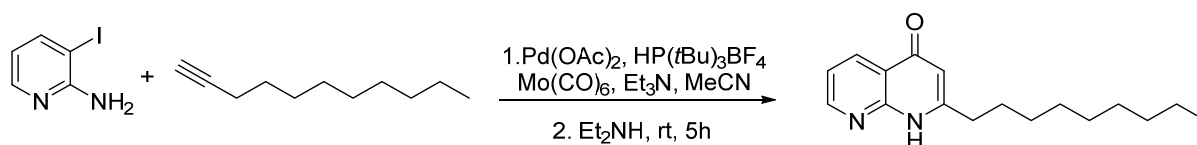

A mixture of 2-amino-1-iodoaniline (220 mg, 1 mmol, 1 eq.), Pd(OAc)<sub>2</sub> (4.5 mg, 0.02 mmol, 0.02 eq.), tri-*tert*-butylphosphonium tetrafluoroborate (17.4 mg, 0.06 mmol, 0.06 eq.), and Mo(CO)<sub>6</sub> (396 mg, 1.5 mmol, 1.5 eq.) in a sealed vial was evacuated and backfilled with nitrogen gas three times. Acetonitril (4 mL), and 1-undecyne (395  $\mu$ L, 2 mmol, 2 eq.), and triethylamine (279  $\mu$ L, 2 mmol, 2 eq.) were added by syringe. The reaction mixture was stirred at room temperature for 16 h whereafter all starting material had been consumed. Diethylamine (517  $\mu$ L, 5 mmol, 5 eq.) was added to the reaction mixture, and stirred at room temperature for another 5 h. The reaction mixture was poured over water and extracted with chloroform (3 x 15 mL). The combined organic phases were dried over MgSO<sub>4</sub>, filtered, and concentrated under vacuum. The residue was purified by column chromatography using silica gel and Hexane/EtOAc (gradient from Hexane/EtOAc 1:4) to obtained desired product as brown powder.

Yield 55%  $R_f$  = 0.55 (Hexane/EtOAc 1:3)

<sup>1</sup>H NMR (400 MHz, DMSO-*d*<sub>6</sub>)  $\delta$  12.03 (s, 1H, NH), 8.70 (dd,  $J$  = 4.5, 2.0 Hz, 1H, H-7), 8.40 (dd,  $J$  = 8.0, 2.1 Hz, 1H, H-5), 7.36 (dd,  $J$  = 7.9, 4.5 Hz, 1H, H-6), 5.98 (s, 1H, H-3), 2.60 (t,  $J$  = 7.6 Hz, 2H, H-9), 1.66 (p,  $J$  = 7.2 Hz, 2H, H-10), 1.37 – 1.13 (m, 12H, H-11-16), 0.89 – 0.76 (m, 3H, H-17).

<sup>13</sup>C NMR (101 MHz, DMSO-*d*<sub>6</sub>)  $\delta$  177.18 (C-4), 155.20 (C-2), 152.64 (C-7), 150.85 (C-8a), 134.38 (C-5), 119.43 (C-4a), 119.01 (C-6), 108.43 (C-3), 32.93 (C-9), 31.22, 28.82, 28.64, 28.62, 28.39, 28.29, 22.05 (C-10-16), 13.90 (C-17).

TOF-HRMS:  $m/z$  = 273.1952 [M+H]<sup>+</sup>, calc. for C<sub>17</sub>H<sub>24</sub>N<sub>2</sub>O + H<sup>+</sup> = 273.1962; 295.1767 [M+Na]<sup>+</sup>, calc. for C<sub>17</sub>H<sub>24</sub>N<sub>2</sub>O + Na<sup>+</sup> = 295.1781

### Synthesis of 6-hydroxy-2-nonylquinolin-4(1*H*)-one (6OH-NQ)

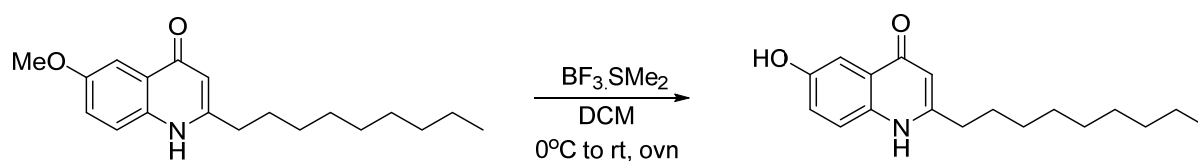

6-Methoxy-2-nonylquinolin-4(1*H*)-one (**6OMe-NQ**) (50 mg, 0.17 mmol, 1 eq.) was dissolved in anhydrous DCM (4 mL) and flushed with nitrogen. After the flask was cooled to 0°C, boron trifluoride-dimethyl sulfite complex (0.523 mL, 4.97 mmol, 30 eq.) was added dropwise. The reaction mixture was allowed to stir at room temperature overnight. The excess  $\text{BF}_3 \cdot \text{SMe}_2$  was quenched by addition of methanol (15 mL) and left to stir for another 30 min. After solvent was removed under vacuum, the residues were purified by column chromatography using silica gel and DCM/MeOH (gradient from 40:1 to 15:1)

Yield: 98%.  $R_f$  = 0.46 (DCM/MeOH 15:1)

$^1\text{H}$  NMR (400 MHz,  $\text{DMSO}-d_6$ )  $\delta$  11.37 (s, 1H, NH), 9.58 (s, 1H, OH), 7.40 (d,  $J$  = 8.9 Hz, 1H, H-8), 7.38 – 7.33 (m, 1H, H-5), 7.10 (dd,  $J$  = 8.8, 2.2 Hz, 1H, H-7), 5.81 (s, 1H H-3), 2.53 (t,  $J$  = 7.6 Hz, 2H, H-9), 1.69 – 1.57 (m, 2H, H-10), 1.35-1.15 (m, 12H, H-11-16), 0.83 (t,  $J$  = 6.4 Hz, 3H, H-17).

$^{13}\text{C}$  NMR (101 MHz,  $\text{DMSO}-d_6$ )  $\delta$  176.3 (C-4), 153.3 (C-2), 152.2 (C-6), 133.6 (C-8a), 126.0 (C-4a), 121.5 (C-7), 119.3 (C-8), 107.4 (C-5), 106.1 (C-3), 33.2 (C-9), 31.2, 28.9, 28.7, 28.6, 28.5, 28.5, 22.1 (C-10-16), 13.9 (C-17).

TOF-HRMS:  $m/z$  = 288.1948  $[\text{M}+\text{H}]^+$ , calc. for  $\text{C}_{18}\text{H}_{25}\text{NO}_2 + \text{H}^+$  = 288.1958; 310.1765  $[\text{M}+\text{Na}]^+$ , calc. for  $\text{C}_{18}\text{H}_{25}\text{NO}_2 + \text{Na}^+$  = 310.1778

### General synthesis of ethyl carbonates:

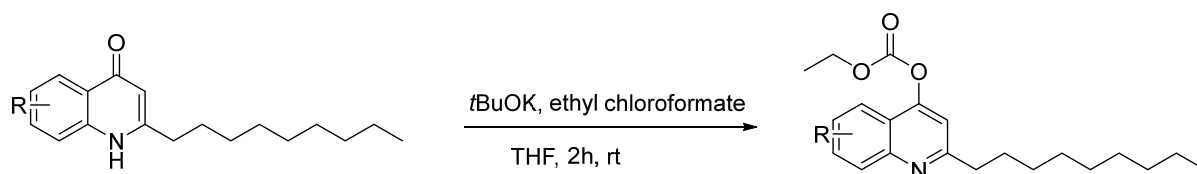

2-Alkyl-4(1*H*)-quinolones (1 eq.) were dissolved in THF (10 mL/ 0.4 g 2-Alkyl-4(1*H*)-quinolones) together with *t*BuOK (1.25 eq.). The reaction mixture was stirred at room temperature for 1 h. Ethyl chloroformate (2.15 eq.) was added and the mixture was stirred at room temperature for another 1 h. The reaction was quenched by the addition of H<sub>2</sub>O and the THF was evaporated under reduced pressure. The residue was diluted with H<sub>2</sub>O and extracted with ethyl acetate. The combined organic phases were dried with MgSO<sub>4</sub>, filtered, and evaporated to yield the pure compound. If traces of educt or by-products were visible on TLC, the residue was purified by column chromatography on silica gel using *n*-hexane/ethyl acetate 7:3.

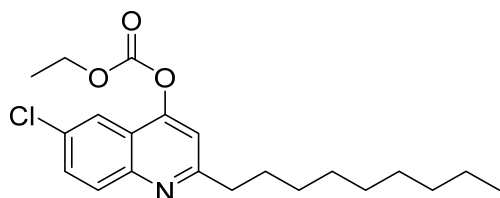

6-Chloro-2-nonylquinolin-4-yl ethyl carbonate: 83%. *R<sub>f</sub>* = 0.80 (Hexane/EtOAc 7:3)

<sup>1</sup>H NMR (400 MHz, CDCl<sub>3</sub>-*d*) δ 7.98 (d, *J* = 7.1 Hz, 2H, H-5, H-8), 7.63 (d, *J* = 9.2 Hz, 1H, H-7), 7.35 (s, 1H, H-3), 4.41 (q, *J* = 7.1 Hz, 2H, -OCH<sub>2</sub>CH<sub>3</sub>), 3.00 – 2.90 (m, 2H, H-9), 1.80 (p, *J* = 7.5 Hz, 2H, H-10), 1.49 – 1.21 (m, 15H, H-11-16, -OCH<sub>2</sub>CH<sub>3</sub>), 0.87 (t, *J* = 6.5 Hz, 3H, -CH<sub>3</sub>).

<sup>13</sup>C NMR (101 MHz, CDCl<sub>3</sub>-*d*) δ 164.6 (C-2), 153.5 (C-4), 152.3 (-OCOO), 148.0 (C-8a), 132.2 (C-6), 131.1 (C-7), 130.6 (C-8), 121.3 (C-5), 120.2 (C-4a), 112.6 (C-3), 65.8 (O-CH<sub>2</sub>-CH<sub>3</sub>), 39.7 (C-9), 32.00, 30.5, 29.8, 29.6 (2C), 29.4, 22.8 (C-10-16), 14.3 (O-CH<sub>2</sub>-CH<sub>3</sub>), 14.2 (C-17).

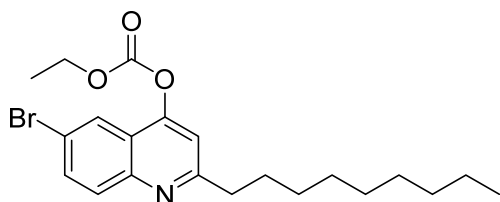

6-Bromo-2-nonylquinolin-4-yl ethyl carbonate: 77%. *R<sub>f</sub>* = 0.77 (Hexane/EtOAc 7:3)

<sup>1</sup>H NMR (400 MHz, CDCl<sub>3</sub>-*d*) δ 8.16 (s, 1H, H-5), 7.91 (d, *J* = 9.0 Hz, 1H, H-7), 7.77 (d, *J* = 9.2 Hz, 1H, H-8), 7.35 (s, 1H, H-3), 4.41 (q, *J* = 7.1 Hz, 2H, -OCH<sub>2</sub>CH<sub>3</sub>), 3.00 – 2.90 (m, 2H, H-9), 1.80 (p, *J* = 7.7 Hz, 2H, H-10), 1.50 – 1.19 (m, 15H, H-11-16, -OCH<sub>2</sub>CH<sub>3</sub>), 0.87 (t, *J* = 6.5 Hz, 3H, H-17).

<sup>13</sup>C NMR (101 MHz, CDCl<sub>3</sub>-*d*) δ 164.8 (C-2), 153.4 (C-4), 152.2 (-OCOO), 148.1 (C-8a), 133.7 (C-7), 130.6 (C-8), 123.6 (C-6), 121.7 (C-5), 120.2 (C-4a), 112.6 (C-3), 65.8 (-

OCH<sub>2</sub>CH<sub>3</sub>), 39.6 (C-9), 32.0, 29.8, 29.60 (2C), 29.59, 29.4, 22.8 (C-10-16), 14.3 (-OCH<sub>2</sub>CH<sub>3</sub>), 14.2 (C-17).

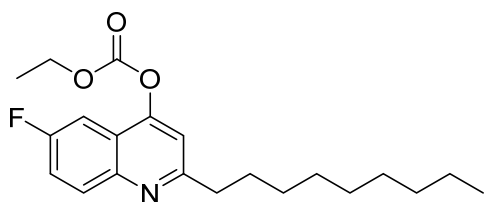

Ethyl (6-fluoro-2-nonylquinolin-4-yl) carbonate: 95%. *R<sub>f</sub>* = 0.72 (Hexane/EtOAc 7:3)

<sup>1</sup>H NMR (400 MHz, CDCl<sub>3</sub>-*d*) δ 8.05 (dd, *J* = 9.2, 5.2 Hz, 1H, H-8), 7.60 (dd, *J* = 9.0, 2.4 Hz, 1H, H-5), 7.47 (td, *J* = 9.2, 2.6 Hz, 1H, H-7), 7.35 (s, 1H, H-3), 4.41 (q, *J* = 7.1 Hz, 2H, -OCH<sub>2</sub>CH<sub>3</sub>), 3.00 – 2.91 (m, 2H, H-9), 1.80 (p, *J* = 7.7 Hz, 2H, H-10), 1.49 – 1.20 (m, 15H, H-11-16, -OCH<sub>2</sub>CH<sub>3</sub>), 0.87 (t, *J* = 6.6 Hz, 3H, H-17).

<sup>13</sup>C NMR (101 MHz, CDCl<sub>3</sub>-*d*) δ 163.5 (C-2), 161.7-159.2 (d, *J* = 248.5 Hz, C-6), 154.0 (C-4), 152.4 (-OCOO), 146.8 (C-8a), 131.6 (d, *J* = 9.1 Hz, C-8), 121.3 (d, *J* = 10.1 Hz, C-4a), 120.3 (d, *J* = 25.3 Hz, C-7), 112.6 (C-3), 105.0 (d, *J* = 24.2 Hz, C-5), 65.8 (-OCH<sub>2</sub>CH<sub>3</sub>), 39.6 (C-9), 34.8, 32.0, 29.9, 29.6 (2C), 29.4, 22.8 (C-10-16), 14.3(-OCH<sub>2</sub>CH<sub>3</sub>), 14.2 (C-17).

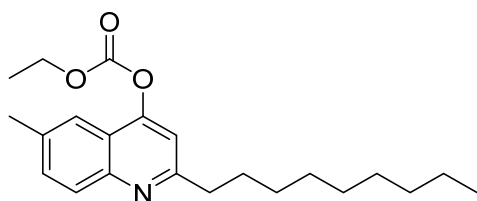

Ethyl (6-methyl-2-nonylquinolin-4-yl) carbonate: 75%. *R<sub>f</sub>* = 0.73 (Hexane/EtOAc 7:3)

<sup>1</sup>H NMR (400 MHz, CDCl<sub>3</sub>-*d*) δ 7.98 (d, *J* = 8.5 Hz, 1H, H-8), 7.74 (s, 1H, H-5), 7.54 (d, *J* = 9.7 Hz, 1H, H-7), 7.27 (s, 1H, H-3), 4.45 – 4.36 (m, 2H, -OCH<sub>2</sub>CH<sub>3</sub>), 3.04 – 2.91 (m, 2H, H-9), 2.53 (s, 3H, Ar-CH<sub>3</sub>), 1.80 (p, *J* = 7.6 Hz, 2H, H-10), 1.48 – 1.22 (m, 15H, H-11-16, -OCH<sub>2</sub>CH<sub>3</sub>), 0.87 (t, *J* = 6.8 Hz, 3H, H-17).

<sup>13</sup>C NMR (101 MHz, CDCl<sub>3</sub>-*d*) δ 163.1 (C-2), 154.1 (C-4), 152.5 (-OCOO), 136.3 (C-6), 132.6 (C-7), 128.5 (C-8), 120.5 (C-6), 119.8 (C-4a), 112.0 (C-3), 65.6 (-OCH<sub>2</sub>CH<sub>3</sub>), 39.4 (C-9), 32.0, 30.0, 29.65, 29.63 (2C), 29.4, 22.8 (C-10-16), 21.8 (Ar-CH<sub>3</sub>), 14.3 (-OCH<sub>2</sub>CH<sub>3</sub>), 14.2 (C-17).

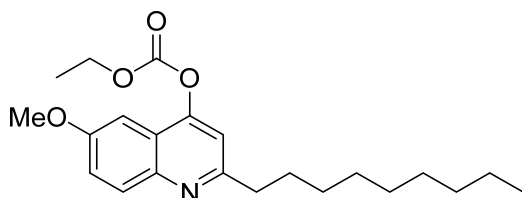

Ethyl (6-methoxy-2-nonylquinolin-4-yl) carbonate: 91%. *R<sub>f</sub>* = 0.65 (Hexane/EtOAc 7:3)

<sup>1</sup>H NMR (600 MHz, CDCl<sub>3</sub>-*d*) δ 7.98 (d, *J* = 7.3 Hz, 1H, H-8), 7.36 (dd, *J* = 9.2, 2.5 Hz, 1H, H-7), 7.28 (s, 1H, H-3), 7.20 (d, *J* = 6.0 Hz, 1H, H-5), 4.41 (q, *J* = 7.1 Hz, 2H, -OCH<sub>2</sub>CH<sub>3</sub>),

3.93 (s, 3H, Ar-OMe), 2.94 (t,  $J = 7.8$  Hz, 2H, H-9), 1.79 (p,  $J = 7.7$  Hz, 2H, H-10), 1.47 – 1.23 (m, 15H, H-11-16, -OCH<sub>2</sub>CH<sub>3</sub>), 0.87 (t,  $J = 6.9$  Hz, 3H, H-17).

<sup>13</sup>C NMR (151 MHz, CDCl<sub>3</sub>-*d*)  $\delta$  161.3 (C-2), 157.8 (C-4), 153.6 (C-6), 152.5 (-OCOO), 130.4 (C-8a), 122.9 (C-8), 121.3 (C-7), 119.0 (C-4a), 112.2 (C-3), 98.9 (C-5), 65.6 (-OCH<sub>2</sub>CH<sub>3</sub>), 55.8 (Ar-OMe), 39.3 (C-9), 32.0, 30.1, 29.6 (2C), 29.4, 22.8 (C-10-16), 14.4 (-OCH<sub>2</sub>CH<sub>3</sub>), 14.2 (C-17).

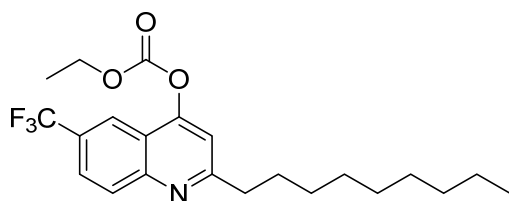

Ethyl (2-nonyl-6-(trifluoromethyl)quinolin-4-yl) carbonate: quant.  $R_f = 0.82$  (Hexane/EtOAc 7:3)

<sup>1</sup>H NMR (400 MHz, CDCl<sub>3</sub>-*d*)  $\delta$  8.33 (s, 1H, H-5), 8.16 (d,  $J = 8.9$  Hz, 1H, H-8), 7.88 (dd,  $J = 8.9, 1.9$  Hz, 1H, H-7), 7.45 (s, 1H, H-3), 4.43 (q,  $J = 7.1$  Hz, 2H, -OCH<sub>2</sub>CH<sub>3</sub>), 3.04 – 2.95 (m, 2H, H-9), 1.83 (p,  $J = 7.6$  Hz, 2H, H-10), 1.47 (t,  $J = 7.1$  Hz, 3H, -OCH<sub>2</sub>CH<sub>3</sub>), 1.45 – 1.23 (m, 12H, H-11-16), 0.87 (t,  $J = 6.8$  Hz, 3H, H-17).

<sup>13</sup>C NMR (101 MHz, CDCl<sub>3</sub>-*d*)  $\delta$  166.9 (C-2), 154.8 (C-4), 152.2 (-OCOO), 150.5 (C-8a), 130.2 (C-8), 129.9 (C-7), 125.93 (Ar-CF<sub>3</sub>), 125.9 (C-6), 119.8 (C-5), 119.5 (C-4a), 112.8 (C-3), 65.9 (-OCH<sub>2</sub>CH<sub>3</sub>), 39.9 (C-9), 32.0, 30.5, 29.8, 29.6, 29.4, 22.8 (C-10-16), 14.3 (-OCH<sub>2</sub>CH<sub>3</sub>), 14.2 (C-17).

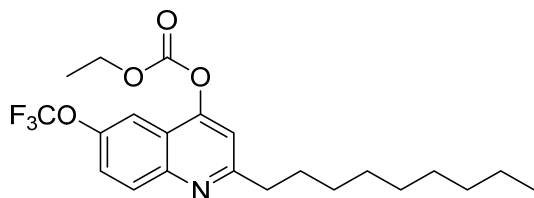

Ethyl (2-nonyl-6-(trifluoromethoxy)quinolin-4-yl) carbonate: quant.  $R_f = 0.80$  (Hexane/EtOAc 7:3)

<sup>1</sup>H NMR (400 MHz, CDCl<sub>3</sub>-*d*)  $\delta$  8.12 (s, 1H, H-5), 7.83 (s, 1H, H-8), 7.58 (d,  $J = 9.1$  Hz, 1H, H-7), 7.42 (s, 1H, H-3), 4.42 (q,  $J = 7.1$  Hz, 2H, -OCH<sub>2</sub>CH<sub>3</sub>), 3.06 – 2.92 (m, 2H, H-9), 1.81 (p,  $J = 7.4$  Hz, 2H, H-10), 1.46 (t,  $J = 7.1$  Hz, 3H, -OCH<sub>2</sub>CH<sub>3</sub>), 1.42 – 1.22 (m, 12H, H-11-16), 0.87 (t,  $J = 6.7$  Hz, 3H, H-17).

<sup>13</sup>C NMR (101 MHz, CDCl<sub>3</sub>-*d*)  $\delta$  164.93 (C-6), 154.35 (-OCOO), 152.15 (C-2), 147.53 (C-4), 146.93 (C-8a), 131.06 (Ar-OCF<sub>3</sub>), 124.37 (C-8), 120.84 (C-4a), 112.63 (C-3, C-7), 112.17 (C-5), 65.89 (-OCH<sub>2</sub>CH<sub>3</sub>), 39.51 (C-9), 32.00, 29.87, 29.61, 29.59 (2C), 29.41 (C-10-15), 22.80 (C-16), 14.28 (-OCH<sub>2</sub>CH<sub>3</sub>), 14.22 (C-17).

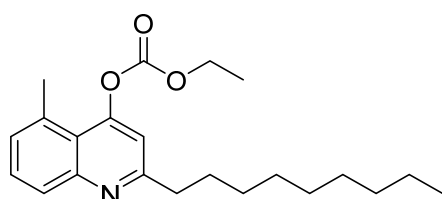

Ethyl (5-methyl-2-nonylquinolin-4-yl) carbonate: 93%.  $R_f$  = 0.93 (Hexane/EtOAc 7:3)

$^1\text{H}$  NMR (400 MHz,  $\text{CDCl}_3$ - $d$ )  $\delta$  7.92 (d,  $J$  = 8.5 Hz, 1H, H-8), 7.55 (t,  $J$  = 7.8 Hz, 1H, H-7), 7.27 (s, 1H, H-6), 7.13 (s, 1H, H-3), 4.40 (q,  $J$  = 7.1 Hz, 2H,  $-\text{OCH}_2\text{CH}_3$ ), 2.99 – 2.91 (m, 2H, H-9), 2.78 (s, 3H, Ar-Me), 1.81 (p,  $J$  = 7.5 Hz, 2H, H-10), 1.48 – 1.20 (m, 15H, H-11-16,  $-\text{OCH}_2\text{CH}_3$ ), 0.88 (t,  $J$  = 6.5 Hz, 3H, H-17).

$^{13}\text{C}$  NMR (101 MHz,  $\text{CDCl}_3$ - $d$ )  $\delta$  163.5 (C-2), 155.7 (C-4), 153.0 ( $-\text{OCOO}$ ), 151.4 (C-8a), 133.2 (C-7), 129.6 (C-5), 129.0 (C-8), 127.7 (C-6), 120.5 (C-4a), 114.0 (C-3), 65.5 ( $-\text{OCH}_2\text{CH}_3$ ), 39.2 (C-9), 32.0, 29.8, 29.6 (2C), 29.4 (C-10-15), 23.3 (Ar-Me), 22.8 (C-16), 14.4 ( $-\text{OCH}_2\text{CH}_3$ ), 14.2 (C-17).

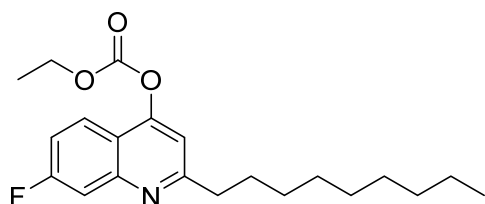

Ethyl (7-fluoro-2-nonylquinolin-4-yl) carbonate: quant.  $R_f$  = 0.78 (Hexane/EtOAc 7:3)

$^1\text{H}$  NMR (400 MHz,  $\text{CDCl}_3$ - $d$ )  $\delta$  8.00 (dd,  $J$  = 9.2, 6.0 Hz, 1H, H-8), 7.69 (dd,  $J$  = 10.2, 2.2 Hz, 1H, H-5), 7.33 – 7.26 (m, 2H, H-6, H-3), 4.40 (q,  $J$  = 7.1 Hz, 2H,  $-\text{OCH}_2\text{CH}_3$ ), 3.00 – 2.91 (m, 2H, H-9), 1.80 (p,  $J$  = 7.7 Hz, 2H, H-10), 1.48 – 1.20 (m, 15H, H-11-16,  $-\text{OCH}_2\text{CH}_3$ ), 0.92 – 0.82 (m, 3H, H-17).

$^{13}\text{C}$  NMR (101 MHz,  $\text{CDCl}_3$ - $d$ )  $\delta$  165.8 (C-2), 163.2 (d,  $J$  = 251.5 Hz, C-7), 154.5 (C-4), 152.3 ( $-\text{OCOO}$ ), 123.5 (d,  $J$  = 10.1 Hz, C-8a), 117.6 (d,  $J$  = 1.1 Hz, C-4a), 116.5 (d,  $J$  = 25.3 Hz, C-6), 112.8 (d,  $J$  = 21.2 Hz, C-8), 111.3 (C-3), 65.7 ( $-\text{OCH}_2\text{CH}_3$ ), 39.7, 32.0, 29.9, 29.6, 29.4, 22.8, 14.3 ( $-\text{OCH}_2\text{CH}_3$ ), 14.2 (C-17).

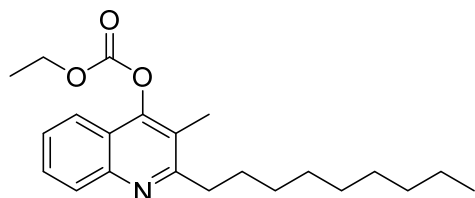

Ethyl (3-methyl-2-nonylquinolin-4-yl) carbonate: 98%.  $R_f$  = 0.68 (Hexane/EtOAc 7:3)

$^1\text{H}$  NMR (400 MHz,  $\text{CDCl}_3$ - $d$ )  $\delta$  8.04 (d,  $J$  = 8.4 Hz, 1H, H-8), 7.82 – 7.76 (m, 1H, H-5), 7.65 (ddd,  $J$  = 8.4, 6.9, 1.3 Hz, 1H, H-7), 7.49 (ddd,  $J$  = 8.1, 7.0, 1.0 Hz, 1H, H-6), 4.38 (q,  $J$  = 7.1 Hz, 2H,  $-\text{OCH}_2\text{CH}_3$ ), 3.03 – 2.95 (m, 2H, H-9), 2.35 (s, 3H,  $-\text{CH}_3$ ), 1.83 – 1.74 (m, 2H, H-10), 1.51 – 1.21 (m, 15H, H-11-16,  $-\text{OCH}_2\text{CH}_3$ ), 0.92 – 0.83 (m, 3H, H-17).

$^{13}\text{C}$  NMR (101 MHz,  $\text{CDCl}_3$ - $d$ )  $\delta$  163.9 (C-2), 152.5 ( $-\text{OCOO}$ ), 151.8 (C-4), 147.6 (C-8a), 129.2 (C-7), 128.9 (C-8), 126.4 (C-6), 121.4 (C-5), 121.2 (C-4a), 120.6 (C-3), 65.7 ( $-\text{OCH}_2\text{CH}_3$ ), 37.1 (C-9), 32.0, 30.0, 29.7 (2C), 29.4, 29.0, 22.8 (C-10-16), 14.4 ( $-\text{OCH}_2\text{CH}_3$ ), 14.2 (C-17), 12.1 ( $-\text{CH}_3$ ).

## General synthesis of ethyl carbonate N-oxides

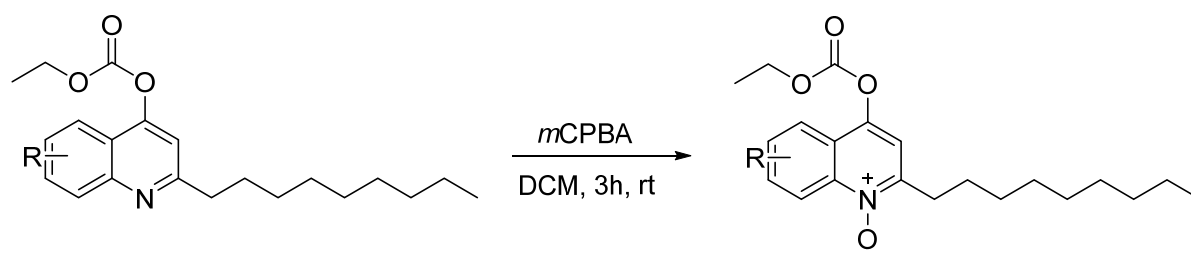

Ethyl carbonates were dissolved in DCM (10 mL/ 250 mg educt) together with *m*CPBA (1.1 eq). The reaction mixture was stirred at room temperature for 3 h. The solution was washed twice with aqueous Na<sub>2</sub>CO<sub>3</sub> 0.5 M and once with H<sub>2</sub>O. The organic phases were dried with MgSO<sub>4</sub>, filtered, and evaporated. The residue was purified by column chromatography on silica gel using Hexane/EtOAc.

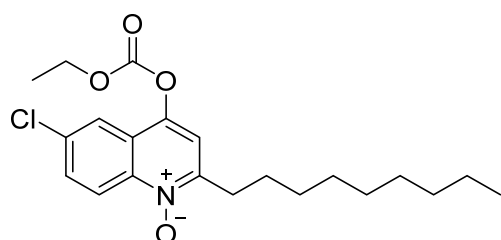

6-Chloro-4-((ethoxycarbonyl)oxy)-2-nonylquinoline 1-oxide: 90%. *R<sub>f</sub>* = 0.80 (EtOAc)

<sup>1</sup>H NMR (400 MHz, CDCl<sub>3</sub>-*d*) δ 8.73 (d, *J* = 9.3 Hz, 1H, H-8), 7.99 (d, *J* = 2.1 Hz, 1H, H-5), 7.72 (dd, *J* = 9.3, 2.1 Hz, 1H, H-7), 7.43 (s, 1H, H-3), 4.42 (q, *J* = 7.1 Hz, 2H, -OCH<sub>2</sub>CH<sub>3</sub>), 3.17 – 3.07 (m, 2H, H-9), 1.80 (p, *J* = 7.6 Hz, 2H, H-10), 1.54 – 1.17 (m, 15H, H-11-16, -OCH<sub>2</sub>CH<sub>3</sub>), 0.87 (t, *J* = 6.8 Hz, 3H, H-17).

<sup>13</sup>C NMR (101 MHz, CDCl<sub>3</sub>-*d*) δ 155.7 (-OCOO), 152.2 (C-2), 145.9 (C-4), 140.8 (C-8a), 135.0 (C-6), 132.0 (C-7), 123.5 (C-5), 122.3 (C-8), 121.1 (C-4a), 114.3 (C-3), 66.2 (-OCH<sub>2</sub>CH<sub>3</sub>), 32.0 (C-9), 31.9, 29.7, 29.6, 29.5, 29.4, 26.2, 22.8 (C-10-16), 14.3 (-OCH<sub>2</sub>CH<sub>3</sub>), 14.2 (C-17).

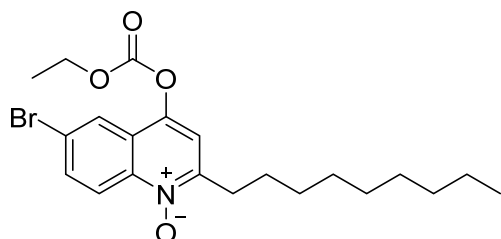

6-Bromo-4-((ethoxycarbonyl)oxy)-2-nonylquinoline 1-oxide: 93%. *R<sub>f</sub>* = 0.82 (EtOAc)

<sup>1</sup>H NMR (400 MHz, CDCl<sub>3</sub>-*d*) δ 8.65 (d, *J* = 9.3 Hz, 1H, H-8), 8.17 (d, *J* = 2.0 Hz, 1H, H-5), 7.85 (dd, *J* = 9.3, 2.0 Hz, 1H, H-7), 7.41 (s, 1H, H-3), 4.42 (q, *J* = 7.1 Hz, 2H, -OCH<sub>2</sub>CH<sub>3</sub>), 3.15 – 3.04 (m, 2H, H-9), 1.80 (p, *J* = 7.6 Hz, 2H, H-10), 1.55 – 1.15 (m, 15H, H-11-16, -OCH<sub>2</sub>CH<sub>3</sub>), 0.87 (t, *J* = 6.8 Hz, 3H, H-17).

<sup>13</sup>C NMR (101 MHz, CDCl<sub>3</sub>-*d*) δ 152.2 (-OCOO), 150.4 (C-2), 142.9 (C-4), 141.1 (C-8a), 134.5 (C-7), 124.4 (C-5), 123.8 (C-8), 123.0 (C-6), 122.3 (C-4a), 114.3 (C-3), 66.1 (-

OCH<sub>2</sub>CH<sub>3</sub>), 32.0 (C-9), 31.9, 29.7, 29.6, 29.5, 29.4, 26.1, 22.8 (C-10-16), 14.3 (-OCH<sub>2</sub>CH<sub>3</sub>), 14.2 (C-17).

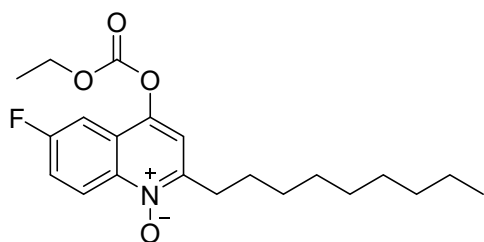

4-((Ethoxycarbonyl)oxy)-6-fluoro-2-nonylquinoline 1-oxide: 82%. *R<sub>f</sub>* = 0.68 (Hexane/EtOAc 1:3)

<sup>1</sup>H NMR (400 MHz, CDCl<sub>3</sub>-*d*) δ 8.78 (dd, *J* = 9.6, 5.1 Hz, 1H, H-8), 7.58 (dd, *J* = 8.7, 2.6 Hz, 1H, H-5), 7.53 – 7.45 (m, 1H, H-7), 7.38 (s, 1H, H-3), 4.38 (q, *J* = 7.1 Hz, 2H, -OCH<sub>2</sub>CH<sub>3</sub>), 3.12 – 3.01 (m, 2H, H-9), 1.78 (p, *J* = 7.6 Hz, 2H, H-10), 1.50 – 1.14 (m, 15H, H-11-16, -OCH<sub>2</sub>CH<sub>3</sub>), 0.90 – 0.77 (m, 3H, H-17).

<sup>13</sup>C NMR (101 MHz, CDCl<sub>3</sub>-*d*) δ 161.3 (d, *J* = 252.5 Hz, C-6), 152.3 (-OCOO), 149.1 (C-2), 143.1 (d, *J* = 6.1 Hz, C-4), 139.4 (C-8a), 124.0 (d, *J* = 10.1 Hz, C-8), 123.5 (d, *J* = 9.1 Hz, C-4a), 120.8 (d, *J* = 25.3 Hz, C-7), 114.4 (C-3), 106.4-106.2 (d, *J* = 24.2 Hz, C-7), 66.0 (-OCH<sub>2</sub>CH<sub>3</sub>), 31.9 (C-9), 31.7, 29.6, 29.6, 29.5, 29.4, 26.1, 22.7 (C-10-16), 14.24 (-OCH<sub>2</sub>CH<sub>3</sub>), 14.17 (C-17).

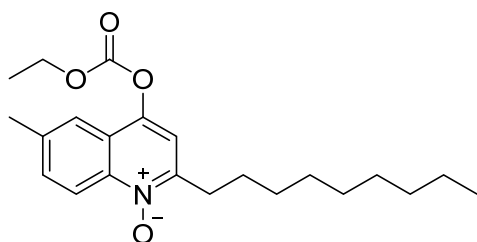

4-((Ethoxycarbonyl)oxy)-6-methyl-2-nonylquinoline 1-oxide: 69%. *R<sub>f</sub>* = 0.62 (EtOAc)

<sup>1</sup>H NMR (400 MHz, CDCl<sub>3</sub>-*d*) δ 8.66 (d, *J* = 8.9 Hz, 1H, H-8), 7.75 (s, 1H, H-5), 7.62 (d, *J* = 9.0 Hz, 1H, H-6), 7.33 (s, 1H, H-3), 4.41 (q, *J* = 7.1 Hz, 2H, -OCH<sub>2</sub>CH<sub>3</sub>), 3.12 (t, *J* = 7.7 Hz, 2H, H-9), 2.55 (s, 3H, Ar-CH<sub>3</sub>), 1.81 (p, *J* = 7.6 Hz, 2H, H-10), 1.51 – 1.18 (m, 15H, H-11-16, -OCH<sub>2</sub>CH<sub>3</sub>), 0.87 (t, *J* = 6.7 Hz, 3H, H-17).

<sup>13</sup>C NMR (101 MHz, CDCl<sub>3</sub>-*d*) δ 154.6 (-OCOO), 152.5 (C-2), 149.4 (C-4), 141.0 (C-8a), 138.7 (C-6), 133.5 (C-7), 122.7 (C-5), 120.8 (C-8), 120.1 (C-4a), 113.3 (C-3), 65.9 (-OCH<sub>2</sub>CH<sub>3</sub>), 32.0 (C-9), 31.8, 29.7, 29.2, 29.5, 29.4, 26.3, 22.8 (C-10-16), 21.7 (Ar-CH<sub>3</sub>), 14.3 (-OCH<sub>2</sub>CH<sub>3</sub>), 14.2 (C-17).

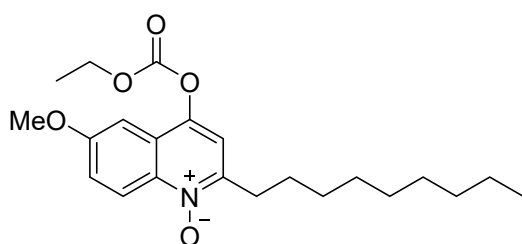

4-((Ethoxycarbonyl)oxy)-6-methoxy-2-nonylquinoline 1-oxide: 77%. *R<sub>f</sub>* = 0.62 (EtOAc)



$^1\text{H}$  NMR (400 MHz,  $\text{CDCl}_3$ -*d*)  $\delta$  8.69 (d,  $J$  = 9.6 Hz, 1H, H-8), 7.41 (dd,  $J$  = 9.5, 2.2 Hz, 1H, H-7), 7.35 (s, 1H, H-3), 7.20 (d,  $J$  = 2.2 Hz, 1H, H-5), 4.42 (q,  $J$  = 7.1 Hz, 2H,  $-\text{OCH}_2\text{CH}_3$ ), 3.95 (s, 3H, Ar-OMe), 3.17 – 3.06 (m, 2H, H-9), 1.80 (p,  $J$  = 7.6 Hz, 2H, H-10), 1.51 – 1.19 (m, 15H, H-11-16,  $-\text{OCH}_2\text{CH}_3$ ), 0.87 (t,  $J$  = 6.6 Hz, 3H, H-17).

$^{13}\text{C}$  NMR (101 MHz,  $\text{CDCl}_3$ -*d*)  $\delta$  159.4 (C-6), 152.4 ( $-\text{OCOO}$ ), 152.17 (C-2), 152.15 (C-4), 138.2 (C-8a), 137.8 (C-8), 123.9 (C-7), 122.1 (C-4a), 113.8 (C-3), 100.1 (C-5), 66.0 ( $-\text{OCH}_2\text{CH}_3$ ), 56.0 (Ar-OMe), 32.0 (C-9), 31.7, 29.1, 29.6, 29.5, 29.4, 26.4, 22.8 (C-10-16), 14.3 ( $-\text{OCH}_2\text{CH}_3$ ), 14.2 (C-17).

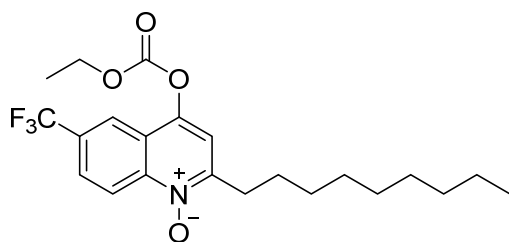

4-((Ethoxycarbonyl)oxy)-2-nonyl-6-(trifluoromethyl)quinoline 1-oxide: 72%.  $R_f$  = 0.79 (Hexane/EtOAc 1:2)

$^1\text{H}$  NMR (400 MHz,  $\text{CDCl}_3$ -*d*)  $\delta$  8.92 (d,  $J$  = 9.1 Hz, 1H, H-8), 8.33 (s, 1H, H-5), 7.96 (dd,  $J$  = 9.2, 1.8 Hz, 1H, H-7), 7.51 (s, 1H, H-3), 4.44 (q,  $J$  = 7.1 Hz, 2H,  $-\text{OCH}_2\text{CH}_3$ ), 3.19 – 3.09 (m, 2H, H-9), 1.82 (p,  $J$  = 7.6 Hz, 2H, H-10), 1.52 – 1.20 (m, 15H, H-11-16,  $-\text{OCH}_2\text{CH}_3$ ), 0.93 – 0.81 (m, 3H, H-17).

$^{13}\text{C}$  NMR (101 MHz,  $\text{CDCl}_3$ -*d*)  $\delta$  152.2 ( $-\text{OCOO}$ ), 151.9 (C-2), 143.8 (C-4), 143.3 (C-8a), 130.6 (C-6), 126.8 (C-5), 122.2 (C-7), 121.9 (Ar- $\text{CF}_3$ ), 120.4 (C-8), 120.3 (C-4a), 114.5 (C-3), 66.2 ( $-\text{OCH}_2\text{CH}_3$ ), 32.01 (C-9), 31.99, 29.7, 29.6, 29.5, 29.4, 26.0, 22.8 (C-10-16), 14.3 ( $-\text{OCH}_2\text{CH}_3$ ), 14.2 (C-17).

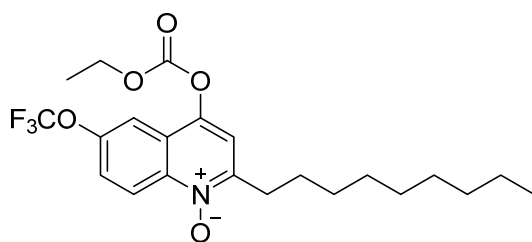

4-((Ethoxycarbonyl)oxy)-2-nonyl-6-(trifluoromethoxy)quinoline 1-oxide: 62%.  $R_f$  = 0.82 (EtOAc)

$^1\text{H}$  NMR (400 MHz,  $\text{CDCl}_3$ -*d*)  $\delta$  8.12 (d,  $J$  = 8.9 Hz, 1H, H-8), 7.82 (s, 1H, H-5), 7.62 – 7.52 (m, 1H, H-7), 7.42 (s, 1H, H-3), 4.42 (q,  $J$  = 7.1 Hz, 2H,  $-\text{OCH}_2\text{CH}_3$ ), 3.07 – 2.91 (m, 2H, H-9), 1.81 (p,  $J$  = 7.6 Hz, 2H, H-10), 1.48 – 1.20 (m, 15H, H-11-16,  $-\text{OCH}_2\text{CH}_3$ ), 0.87 (t,  $J$  = 6.7 Hz, 3H, H-17).

$^{13}\text{C}$  NMR (101 MHz,  $\text{CDCl}_3$ -*d*)  $\delta$  164.9 (C-6), 154.4 ( $-\text{OCOO}$ ), 152.2 (C-2), 147.5 (C-4), 146.9 (C-8a), 131.1 (Ar- $\text{OCF}_3$ ), 124.4 (C-8), 120.8 (C-4a), 112.6 (C-3, C-7), 112.2 (C-5), 65.9 ( $-\text{OCH}_2\text{CH}_3$ ), 39.5 (C-9), 32.0, 29.9, 29.61, 29.59 (2C), 29.4, 22.8 (C-10-16), 14.3 ( $-\text{OCH}_2\text{CH}_3$ ), 14.2 (C-17).

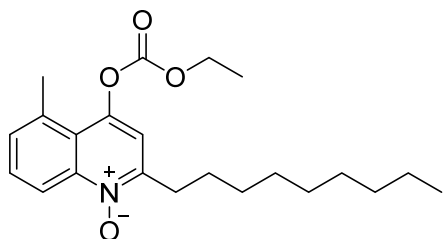

4-((Ethoxycarbonyl)oxy)-5-methyl-2-nonylquinoline 1-oxide: 88%.  $R_f$  = 0.62 (Hexane/EtOAc 1:2)

$^1\text{H}$  NMR (800 MHz,  $\text{CDCl}_3$ -*d*)  $\delta$  8.74 (d,  $J$  = 8.8 Hz, 1H, H-8), 7.66 – 7.60 (m, 1H, H-7), 7.38 (d,  $J$  = 7.1 Hz, 1H, H-6), 7.14 (s, 1H, H-3), 4.40 (q,  $J$  = 7.1 Hz, 2H, - $\text{OCH}_2\text{CH}_3$ ), 3.12 – 3.08 (m, 2H, H-9), 2.78 (s, 3H, Ar-Me), 1.80 (p,  $J$  = 7.8 Hz, 2H, H-10), 1.49-1.41 (m, 5H, H-11, - $\text{OCH}_2\text{CH}_3$ ), 1.37 (p,  $J$  = 7.0 Hz, 2H, H-12), 1.32-1.22 (m, 8H, H-13-16), 0.87 (t,  $J$  = 7.1 Hz, 3H, H-17).

$^{13}\text{C}$  NMR (201 MHz,  $\text{CDCl}_3$ -*d*)  $\delta$  153.0 (-OCOO), 149.2 (C-2), 145.0 (C-4), 144.2 (C-8a), 134.4 (C-5), 131.2 (C-6), 130.6 (C-7), 122.5 (C-8), 118.8 (C-4a), 115.1 (C-3), 65.8 (- $\text{OCH}_2\text{CH}_3$ ), 32.0 (C-9), 31.6, 29.7, 29.6, 29.55, 29.4, 26.0 (C-10-15), 23.0 (Ar-Me), 22.8 (C-16), 14.4 (- $\text{OCH}_2\text{CH}_3$ ), 14.2 (C-17).

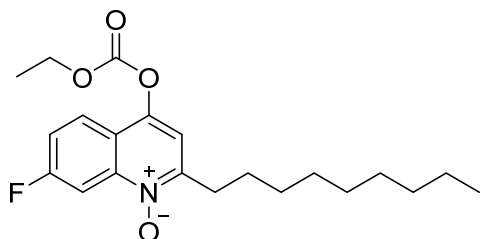

4-((Ethoxycarbonyl)oxy)-7-fluoro-2-nonylquinoline 1-oxide: 68%.  $R_f$  = 0.87 (Hexane/EtOAc 1:3)

$^1\text{H}$  NMR (400 MHz,  $\text{CDCl}_3$ -*d*)  $\delta$  8.46 (dd,  $J$  = 10.1, 2.5 Hz, 1H, H-5), 8.04 (dd,  $J$  = 9.2, 5.4 Hz, 1H, H-8), 7.41 (ddd,  $J$  = 9.2, 7.7, 2.6 Hz, 1H, H-6), 7.36 (s, 1H, H-3), 4.41 (q,  $J$  = 7.1 Hz, 2H, - $\text{OCH}_2\text{CH}_3$ ), 3.17 – 3.08 (m, 2H, H-9), 1.81 (p,  $J$  = 7.6 Hz, 2H, H-10), 1.51 – 1.19 (m, 15H, H-11-16, - $\text{OCH}_2\text{CH}_3$ ), 0.91 – 0.83 (m, 3H, H-17).

$^{13}\text{C}$  NMR (101 MHz,  $\text{CDCl}_3$ -*d*)  $\delta$  164.5 (d,  $J$  = 254.5 Hz, C-7), 152.3 (-OCOO), 151.3 (C-2), 144.1 (C-4), 143.5 (d,  $J$  = 11.1 Hz, C-8a), 124.9 (d,  $J$  = 9.1 Hz, C-5), 119.7 (C-4a), 118.6 (d,  $J$  = 26.3 Hz, H-6), 112.7 (C-3), 105.7 (d,  $J$  = 27.3 Hz, C-8), 66.1 (- $\text{OCH}_2\text{CH}_3$ ), 32.0 (C-9), 31.1, 29.7, 29.6, 29.5, 29.4, 26.1, 22.8 (C-10-16), 14.3 (- $\text{OCH}_2\text{CH}_3$ ), 14.2 (C-17).

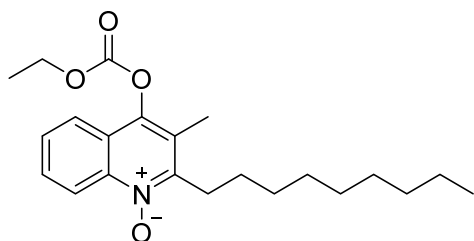

4-((Ethoxycarbonyl)oxy)-3-methyl-2-nonylquinoline 1-oxide: 75%.  $R_f$  = 0.68 (Hexane/EtOAc 1:4)

$^1\text{H}$  NMR (400 MHz,  $\text{CDCl}_3$ -*d*)  $\delta$  8.75 (d,  $J = 8.7$  Hz, 1H, H-8), 7.81 (d,  $J = 8.3$  Hz, 1H, H-5), 7.72 (ddd,  $J = 8.5, 7.0, 1.2$  Hz, 1H, H-7), 7.64 – 7.57 (m, 1H, H-6), 4.39 (q,  $J = 7.1$  Hz, 2H,  $-\text{OCH}_2\text{CH}_3$ ), 3.23 – 3.15 (m, 2H, H-9), 2.35 (s, 3H,  $-\text{CH}_3$ ), 1.73 (p,  $J = 7.6$  Hz, 2H, H-10), 1.55 – 1.19 (m, 15H, H-11-16,  $-\text{OCH}_2\text{CH}_3$ ), 0.91 – 0.82 (m, 3H, H-17).

$^{13}\text{C}$  NMR (101 MHz,  $\text{CDCl}_3$ -*d*)  $\delta$  152.6 ( $-\text{OCOO}$ ), 151.0 (C-2), 142.2 (C-4), 140.9 (C-8a), 130.2 (C-7), 128.5 (C-6), 123.1 (C-4a), 123.0 (C-5), 121.3 (C-8), 120.4 (C-3), 66.0 ( $-\text{OCH}_2\text{CH}_3$ ), 32.0 (C-9), 30.3, 29.7, 29.5, 29.4, 29.1, 25.5, 22.8 (C-10-16), 14.3 ( $-\text{OCH}_2\text{CH}_3$ ), 14.2 (C-17), 12.8 ( $-\text{CH}_3$ ).

## General synthesis of 1-hydroxy-quinoline-4-ones

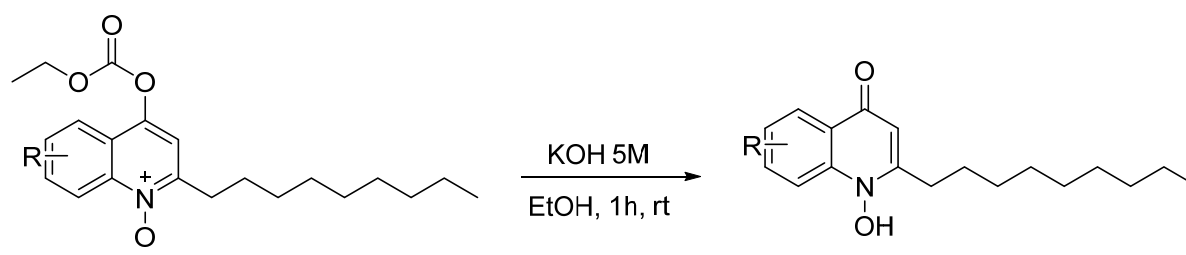

Ethyl-carbonate protected 4(1*H*)-quinolone *N*-oxides were dissolved in EtOH (10 mL/ 300 mg educts and aqueous KOH 5M (20 eq.) was added dropwise. The resulting yellow coloured reaction mixture was stirred at room temperature for 1 h. H<sub>2</sub>O was added and the reaction was cooled to 0°C, and pH was adjusted to 1-2 with conc. HCl to form the milky suspension which soon crystallized. The product was collected by vacuum filtration and washed with cold H<sub>2</sub>O. Recrystallization with EtOH/H<sub>2</sub>O allowed to obtain the desired product as crystalline white solid.

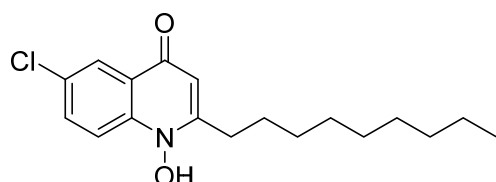

6-Chloro-1-hydroxy-2-nonylquinolin-4(1*H*)-one (**6Cl-NQNO**): 46%

<sup>1</sup>H NMR (400 MHz, CDCl<sub>3</sub>-*d*) δ 8.15 (d, *J* = 2.4 Hz, 1H, H-5), 8.08 (d, *J* = 9.2 Hz, 1H, H-7), 7.57 (dd, *J* = 9.1, 2.4 Hz, 1H, H-8), 6.12 (s, 1H, H-3), 2.63 (t, *J* = 8.0 Hz, 2H, H-9), 1.43 (q, *J* = 7.2 Hz, 2H, H-10), 1.28 – 1.15 (m, 12H, H-11-16), 0.86 (t, *J* = 7.0 Hz, 3H, H-17).

<sup>13</sup>C NMR (101 MHz, CDCl<sub>3</sub>-*d*) δ 170.19 (C-4), 158.16 (C-2), 138.93 (C-8a), 133.50 (C-6), 123.89 (C-7), 118.79 (C-4a), 106.00 (C-5), 93.42 (C-8), 85.80 (C-3), 32.03 (C-9), 29.86, 29.68, 29.62, 29.47, 29.43, 27.58, 22.81 (C-10-16), 14.23 (C-17).

TOF-HRMS: *m/z* = 322.1564 [M+H]<sup>+</sup>, calc. for C<sub>18</sub>H<sub>24</sub>ClNO<sub>2</sub> + H<sup>+</sup> = 322.1569; 344.1389 [M+Na]<sup>+</sup>, calc. for C<sub>18</sub>H<sub>24</sub>ClNO<sub>2</sub> + Na<sup>+</sup> = 344.1388

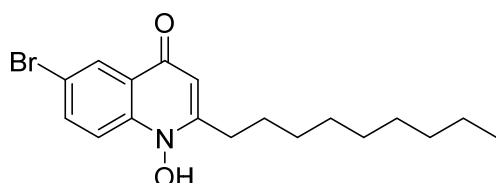

6-Bromo-1-hydroxy-2-nonylquinolin-4(1*H*)-one (**6Br-NQNO**): 33%

<sup>1</sup>H NMR (400 MHz, CDCl<sub>3</sub>-*d*) δ 8.31 (d, *J* = 1.8 Hz, 1H, H-5), 8.01 (d, *J* = 9.2 Hz, 1H, H-7), 7.71 (dd, *J* = 9.1, 2.4 Hz, 1H, H-8), 6.08 (s, 1H, H-3), 2.61 (t, *J* = 8.0 Hz, 2H, H-9), 1.52 – 1.35 (m, 2H, H-10), 1.29 – 1.16 (m, 12H, H-11-16), 0.87 (t, *J* = 7.0 Hz, 3H, H-17).

<sup>13</sup>C NMR (101 MHz, CDCl<sub>3</sub>-*d*) δ 177.75 (C-4), 139.29 (C-2), 136.00 (C-8a), 133.46 (C-7), 127.32 (C-4a), 125.43 (C-5), 118.74 (C-8), 113.01 (C-6), 106.10 (C-3), 32.05 (C-9), 29.86, 29.70, 29.62, 29.47, 29.45, 27.57, 22.83 (C-10-16), 14.26 (C-17).

TOF-HRMS:  $m/z = 366.1065$   $[M+H]^+$ , calc. for  $C_{18}H_{24}BrNO_2 + H^+ = 366.1063$ ;  $388.0881$   $[M+Na]^+$ , calc. for  $C_{18}H_{24}BrNO_2 + Na^+ = 388.0882$

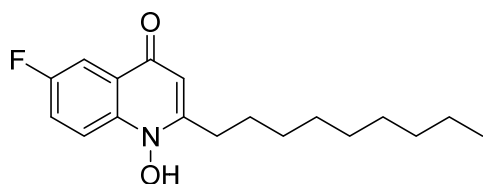

6-Fluoro-1-hydroxy-2-nonylquinolin-4(1*H*)-one (**6F-NQNO**): 62%

$^1H$  NMR (400 MHz,  $CDCl_3-d$ )  $\delta$  8.19 – 8.04 (m, 1H, H-5), 8.02 – 7.78 (m, 1H, H-7), 7.54 – 7.31 (m, 1H, H-8), 6.30 – 6.03 (m, 1H, H-3), 2.59 (t,  $J = 7.9$  Hz, 2H, H-9), 1.52–1.37 (m, 2H, H-10), 1.27 – 1.13 (m, 12H, H-11–16), 0.86 (t,  $J = 7.0$  Hz, 3H, H-17).

$^{13}C$  NMR (101 MHz,  $CDCl_3-d$ )  $\delta$  160.1 (C-6,  $J = 248.5$  Hz), 155.5 (C-4), 137.5 (C-2), 134.5 (C-8a), 121.6 (C-4a,  $J = 25.3$  Hz), 119.6 (C-7,  $J = 7.1$  Hz), 116.8 (C-8), 109.2 (C-5,  $J = 23.2$  Hz), 105.5 (C-3), 32.0 (C-9), 31.6, 29.9, 29.7, 29.6, 29.4, 27.5, 22.8 (C-10–16), 14.2 (C-17).

TOF-HRMS:  $m/z = 306.1852$   $[M+H]^+$ , calc. for  $C_{18}H_{24}FNO_2 + H^+ = 306.1852$ ;  $328.1683$   $[M+Na]^+$ , calc. for  $C_{18}H_{24}FNO_2 + Na^+ = 328.1677$ .

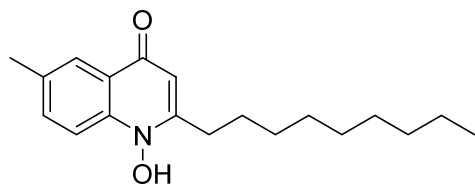

1-Hydroxy-6-methyl-2-nonylquinolin-4(1*H*)-one (**6Me-NQNO**): 88.50%

$^1H$  NMR (400 MHz,  $CDCl_3-d$ )  $\delta$  8.04 (d,  $J = 8.8$  Hz, 1H, H-5), 7.99 (s, 1H, H-7), 7.44 (d,  $J = 8.9$  Hz, 1H, H-8), 6.31 (s, 1H, H-3), 2.62 (t,  $J = 7.8$  Hz, 2H, H-9), 2.42 (s, 3H,  $-CH_3$ ), 1.53 – 1.39 (m, 2H, H-10), 1.32 – 1.10 (m, 12H, H-11–16), 0.85 (t,  $J = 7.0$  Hz, 3H, H-17).

$^{13}C$  NMR (101 MHz,  $CDCl_3-d$ )  $\delta$  154.80 (C-2), 138.68 (C-8a), 135.30 (C-6), 134.06 (C-7), 123.40 (C-4a), 122.95 (C-5), 116.49 (C-8), 104.90 (C-3), 31.71 (C-9), 31.33, 29.38, 29.32, 29.13 (2C), 27.22, 22.49 (C-10–16), 20.98 ( $-CH_3$ ), 13.92 (C-17).

TOF-HRMS:  $m/z = 302.2108$   $[M+H]^+$ , calc. for  $C_{19}H_{27}NO_2 + H^+ = 302.2115$ ;  $324.1932$   $[M+Na]^+$ , calc. for  $C_{19}H_{27}NO_2 + Na^+ = 324.1934$

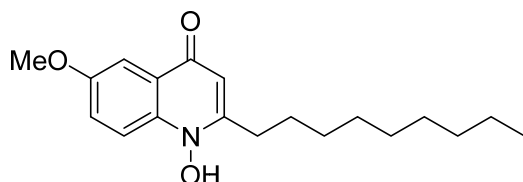

1-Hydroxy-6-methoxy-2-nonylquinolin-4(1*H*)-one (**6OMe-NQNO**): 41%

$^1H$  NMR (400 MHz,  $CDCl_3-d$ )  $\delta$  8.14 (d,  $J = 9.4$  Hz, 1H, H-5), 7.58 (d,  $J = 2.9$  Hz, 1H, H-8), 7.28 (dd,  $J = 9.4, 2.8$  Hz, 1H, H-7), 6.19 (s, 1H, H-3), 3.87 (s, 3H,  $-OMe$ ), 2.60 – 2.29 (m, 2H, H-9), 1.36 (q,  $J = 6.6$  Hz, 2H, H-10), 1.27 – 1.07 (m, 12H, H-11–16), 0.86 (t,  $J = 7.0$  Hz, 3H, H-17).

$^{13}\text{C}$  NMR (101 MHz,  $\text{CDCl}_3$ -*d*)  $\delta$  157.62 (C-2), 153.39 (C-6), 136.08 (C-8a), 124.74 (C-4a), 124.01 (C-8), 118.96 (C-7), 105.05 (C-5), 103.14 (C-3), 55.83 (-OMe), 32.05 (C-9), 31.31, 29.85, 29.72, 29.63, 29.41, 27.49, 22.80 (C-10-16), 14.22 (C-17).

TOF-HRMS:  $m/z$  = 318.2057  $[\text{M}+\text{H}]^+$ , calc. for  $\text{C}_{19}\text{H}_{27}\text{NO}_3 + \text{H}^+ = 318.2064$ ; 340.1881  $[\text{M}+\text{Na}]^+$ , calc. for  $\text{C}_{19}\text{H}_{27}\text{NO}_3 + \text{Na}^+ = 340.1883$

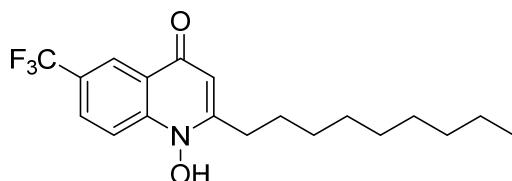

1-Hydroxy-2-nonyl-6-(trifluoromethyl)quinolin-4(1*H*)-one (**6CF<sub>3</sub>-NQNO**): 34%

$^1\text{H}$  NMR (400 MHz,  $\text{MeOD}$ -*d*<sub>4</sub>)  $\delta$  8.58 (s, 1H, H-5), 8.20 (d,  $J = 8.8$  Hz, 1H, H-8), 8.06 (d,  $J = 9.0$  Hz, 1H, H-7), 6.34 (s, 1H, H-3), 2.94 (t,  $J = 7.5$  Hz, 2H, H-9), 1.81 (q,  $J = 6.8$  Hz, 2H, H-10), 1.56 – 1.24 (m, 12H, H-11-16), 0.91 (t,  $J = 6.4$  Hz, 3H, H-17).

$^{13}\text{C}$  NMR (101 MHz,  $\text{MeOD}$ -*d*<sub>4</sub>)  $\delta$  173.9 (C-4, only in HMBC), 158.2 (C-2), 143.6 (C-8a), 129.7 (C-4a), 129.6 (C-7), 125.3 (C-6), 124.20 (Ar- $\text{CF}_3$ ), 124.16 (C-5), 117.8 (C-8), 109.2 (C-3), 33.0 (C-9), 32.6, 30.6, 30.4 (2C), 28.9, 23.7 (C-10-16), 14.4 (C-17).

TOF-HRMS:  $m/z$  = 356.1826  $[\text{M}+\text{H}]^+$ , calc. for  $\text{C}_{19}\text{H}_{24}\text{F}_3\text{NO}_2 + \text{H}^+ = 356.1832$ ; 378.1648  $[\text{M}+\text{Na}]^+$ , calc. for  $\text{C}_{19}\text{H}_{24}\text{F}_3\text{NO}_2 + \text{Na}^+ = 378.1651$

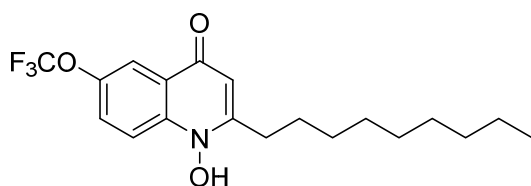

1-Hydroxy-2-nonyl-6-(trifluoromethoxy)quinolin-4(1*H*)-one (**6OCF<sub>3</sub>-NQNO**): 41%

$^1\text{H}$  NMR (400 MHz,  $\text{CDCl}_3$ -*d*)  $\delta$  8.18 (d,  $J = 9.4$  Hz, 1H, H-5), 8.05 (d,  $J = 2.7$  Hz, 1H, H-8), 7.49 (dd,  $J = 9.3, 2.9$  Hz, 1H, H-7), 6.23 (s, 1H, H-3), 2.69 (t,  $J = 8.2$  Hz, 2H, H-9), 1.62 – 1.45 (m, 2H, H-10), 1.28 – 1.18 (m, 12H, H-11-16), 0.85 (t,  $J = 7.0$  Hz, 3H, H-17).

$^{13}\text{C}$  NMR (101 MHz,  $\text{CDCl}_3$ -*d*)  $\delta$  156.62 (C-2), 146.50 (C-6), 138.87 (C-8a), 126.11 (C-4a), 124.47 (-OCF<sub>3</sub>), 121.86 (C-8), 119.19 (C-7), 115.85 (C-5), 106.08 (C-3), 31.97 (C-9), 31.75, 29.60, 29.55, 29.41, 29.37, 27.61, 22.76 (C-10-16), 14.14 (C-17).

TOF-HRMS:  $m/z$  = 372.1774  $[\text{M}+\text{H}]^+$ , calc. for  $\text{C}_{19}\text{H}_{24}\text{F}_3\text{NO}_3 + \text{H}^+ = 372.1780$ ; 394.1595  $[\text{M}+\text{Na}]^+$ , calc. for  $\text{C}_{19}\text{H}_{24}\text{F}_3\text{NO}_3 + \text{Na}^+ = 394.1600$

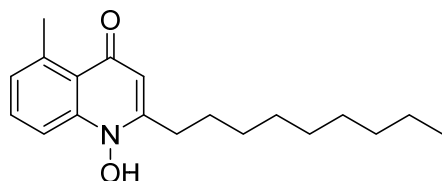

1-Hydroxy-5-methyl-2-nonylquinolin-4(1*H*)-one (**5Me-NQNO**): 44%

$^1\text{H}$  NMR (400 MHz,  $\text{CDCl}_3$ -*d*)  $\delta$  8.03 (d,  $J$  = 8.7 Hz, 1H, H-7), 7.43 (t,  $J$  = 7.9 Hz, 1H, H-8), 7.07 (d,  $J$  = 7.3 Hz, 1H, H-6), 6.09 (s, 1H, H-3), 2.85 (s, 3H, Ar-Me), 2.48 (t,  $J$  = 7.9 Hz, 2H, H-9), 1.46 – 1.00 (m, 14H, H-10-16), 0.87 (t,  $J$  = 7.0 Hz, 3H, H-17).

$^{13}\text{C}$  NMR (101 MHz,  $\text{CDCl}_3$ -*d*)  $\delta$  169.8 (C-4), 154.5 (C-2), 142.5 (C-8a), 139.6 (C-5), 131.8 (C-7), 127.9 (C-6), 122.4 (C-4a), 114.9 (C-8), 106.3 (C-3), 32.0 (C-9), 31.1, 29.7, 29.6, 29.4, 29.4, 27.2 (C-10-15), 24.0 (Ar-Me), 22.8 (C-16), 14.2 (C-17)

TOF-HRMS:  $m/z$  = 302.2106  $[\text{M}+\text{H}]^+$ , calc. for  $\text{C}_{19}\text{H}_{27}\text{NO}_2 + \text{H}^+ = 302.2115$ ; 324.1931  $[\text{M}+\text{Na}]^+$ , calc. for  $\text{C}_{19}\text{H}_{27}\text{NO}_2 + \text{Na}^+ = 324.1934$

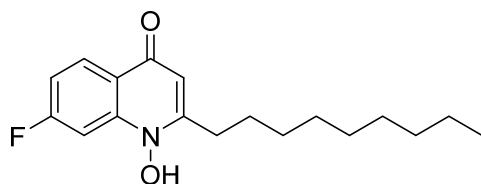

7-Fluoro-1-hydroxy-2-nonylquinolin-4(1*H*)-one (**7F-NQNO**): 66%

$^1\text{H}$  NMR (400 MHz,  $\text{CDCl}_3$ -*d*)  $\delta$  8.19 (dd,  $J$  = 9.0, 5.9 Hz, 1H, H-5), 7.73 (dd,  $J$  = 10.1, 2.6 Hz, 1H, H-8), 7.07 (td,  $J$  = 8.0, 2.5 Hz, 1H, H-6), 6.16 (s, 1H, H-3), 2.66 (t,  $J$  = 7.9 Hz, 2H, H-9), 1.55-1.44 (m, 2H, H-10), 1.26 – 1.18 (m, 12H, H-11-16), 0.86 (t,  $J$  = 7.0 Hz, 3H, H-17).

$^{13}\text{C}$  NMR (101 MHz,  $\text{CDCl}_3$ -*d*)  $\delta$  166.68 (C-4), 164.16 (C-7,  $J$  = 252.5 Hz), 156.98 (C-2), 142.20, 142.08 (C8a,  $J$  = 12.1 Hz), 128.08, 127.99 (C-5,  $J$  = 9.1 Hz), 120.42 (C-4a), 114.72, 114.47 (C-6,  $J$  = 25.3 Hz), 105.58 (C-3), 102.50, 102.23 (C-8,  $J$  = 27.3 Hz), 32.01 (C-9), 31.74 (C-10), 29.86, 29.64, 29.58, 29.43, 27.50, 22.81 (C-11-16), 14.22 (C-17).

TOF-HRMS:  $m/z$  = 306.1855  $[\text{M}+\text{H}]^+$ , calc. for  $\text{C}_{18}\text{H}_{24}\text{FNO}_2 + \text{H}^+ = 306.1864$ ; 328.1680  $[\text{M}+\text{Na}]^+$ , calc. for  $\text{C}_{18}\text{H}_{24}\text{FNO}_2 + \text{Na}^+ = 328.1683$

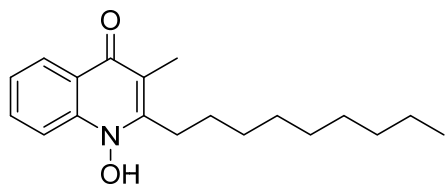

1-Hydroxy-3-methyl-2-nonylquinolin-4(1*H*)-one (**3Me-NQNO**): 72%

$^1\text{H}$  NMR (400 MHz,  $\text{MeOD}$ -*d*<sub>4</sub>)  $\delta$  8.31 (dd,  $J$  = 8.2, 1.0 Hz, 1H, H-5), 7.99 (d,  $J$  = 8.5 Hz, 1H, H-8), 7.77 (ddd,  $J$  = 8.6, 7.0, 1.5 Hz, 1H, H-7), 7.45 (ddd,  $J$  = 8.1, 7.0, 1.0 Hz, 1H, H-6), 3.06 (dd,  $J$  = 9.3, 6.9 Hz, 2H, H-9), 2.25 (s, 3H, -CH<sub>3</sub>), 1.80 – 1.70 (m, 2H, H-10), 1.58 – 1.26 (m, 12H, H-11-16), 0.97 – 0.85 (m, 3H, H-17).

$^{13}\text{C}$  NMR (101 MHz,  $\text{MeOD}$ -*d*<sub>4</sub>)  $\delta$  173.9 (C-4, only in HMBC), 154.2 (C-2), 140.9 (C-8a), 133.1 (C-7), 126.2 (C-6), 125.1 (C-5), 124.5 (C-4a), 115.9 (C-8), 115.8 (C-3), 33.0 (C-9), 30.8, 30.6, 30.40, 30.38, 29.8, 28.8, 23.7 (C-10-16), 14.4 (C-17), 11.6 (-CH<sub>3</sub>).

TOF-HRMS:  $m/z$  = 302.2105  $[\text{M}+\text{H}]^+$ , calc. for  $\text{C}_{19}\text{H}_{27}\text{NO}_2 + \text{H}^+ = 302.2115$ ; 324.1928  $[\text{M}+\text{Na}]^+$ , calc. for  $\text{C}_{19}\text{H}_{27}\text{NO}_2 + \text{Na}^+ = 324.1934$

### Synthesis of 1,6-dihydroxy-2-nonylquinolin-4(1*H*)-one (6OH-NQNO)

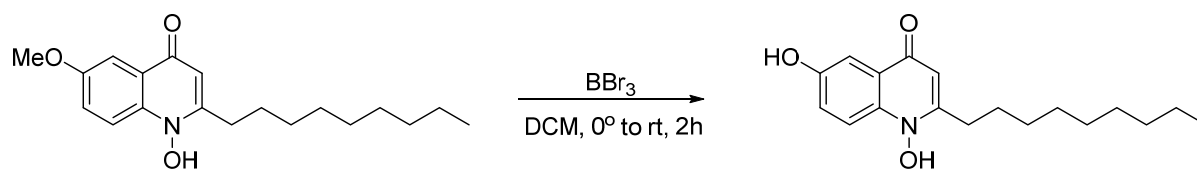

1-Hydroxy-6-methoxy-2-nonylquinolin-4(1*H*)-one (**6OMe-NQNO**) (140 mg, 0.44 mmol, 1 eq.) was dissolved in anhydrous DCM (4.4 mL) and flushed with nitrogen. After the flask was cooled to 0°C, boron tribromide (1M in DCM) (1.32 mL, 1.32 mmol, 3 eq.) was added dropwise. The reaction mixture was warmed to room temperature and stirred for 2 h. H<sub>2</sub>O was added and the reaction was cooled to 0°C, and pH was adjusted to 1-2 with conc. HCl to form a milky suspension which soon crystallized. The product was collected by vacuum filtration and washed with cold H<sub>2</sub>O. Recrystallization with EtOH/H<sub>2</sub>O to obtain the desired product as crystalline white solid.

Yield: 95%

<sup>1</sup>H NMR (400 MHz, MeOD-*d*<sub>4</sub>) δ 8.13 (d, *J* = 9.5 Hz, 1H, H-5), 7.54 (d, *J* = 2.6 Hz, 1H, H-7), 7.43 – 7.31 (m, 1H, H-8), 6.43 (s, 1H, H-3), 2.96 (t, *J* = 7.9 Hz, 2H, H-9), 1.86-1.71 (m, 2H, H-10), 1.54 – 1.24 (m, 12H, H-11-16), 0.92 (t, *J* = 6.9 Hz, 3H, H-17).

<sup>13</sup>C NMR (101 MHz, MeOD-*d*<sub>4</sub>) δ 157.04 (C-2), 153.35 (C-6), 147.46 (C-8a), 136.40 (C-4a), 124.22 (C-7), 119.47 (C-8), 107.31 (C-5), 106.06 (C-3), 33.02 (C-9), 32.34, 30.59, 30.50, 30.41 (2C), 28.64, 23.72 (C-10-16), 14.41 (C-17).

TOF-HRMS: *m/z* = 304.1904 [M+H]<sup>+</sup>, calc. for C<sub>18</sub>H<sub>25</sub>NO<sub>3</sub> + H<sup>+</sup> = 304.1907; 326.1928 [M+Na]<sup>+</sup>, calc. for C<sub>18</sub>H<sub>25</sub>NO<sub>3</sub> + Na<sup>+</sup> = 326.1726.



## Annex I: NMR spectra

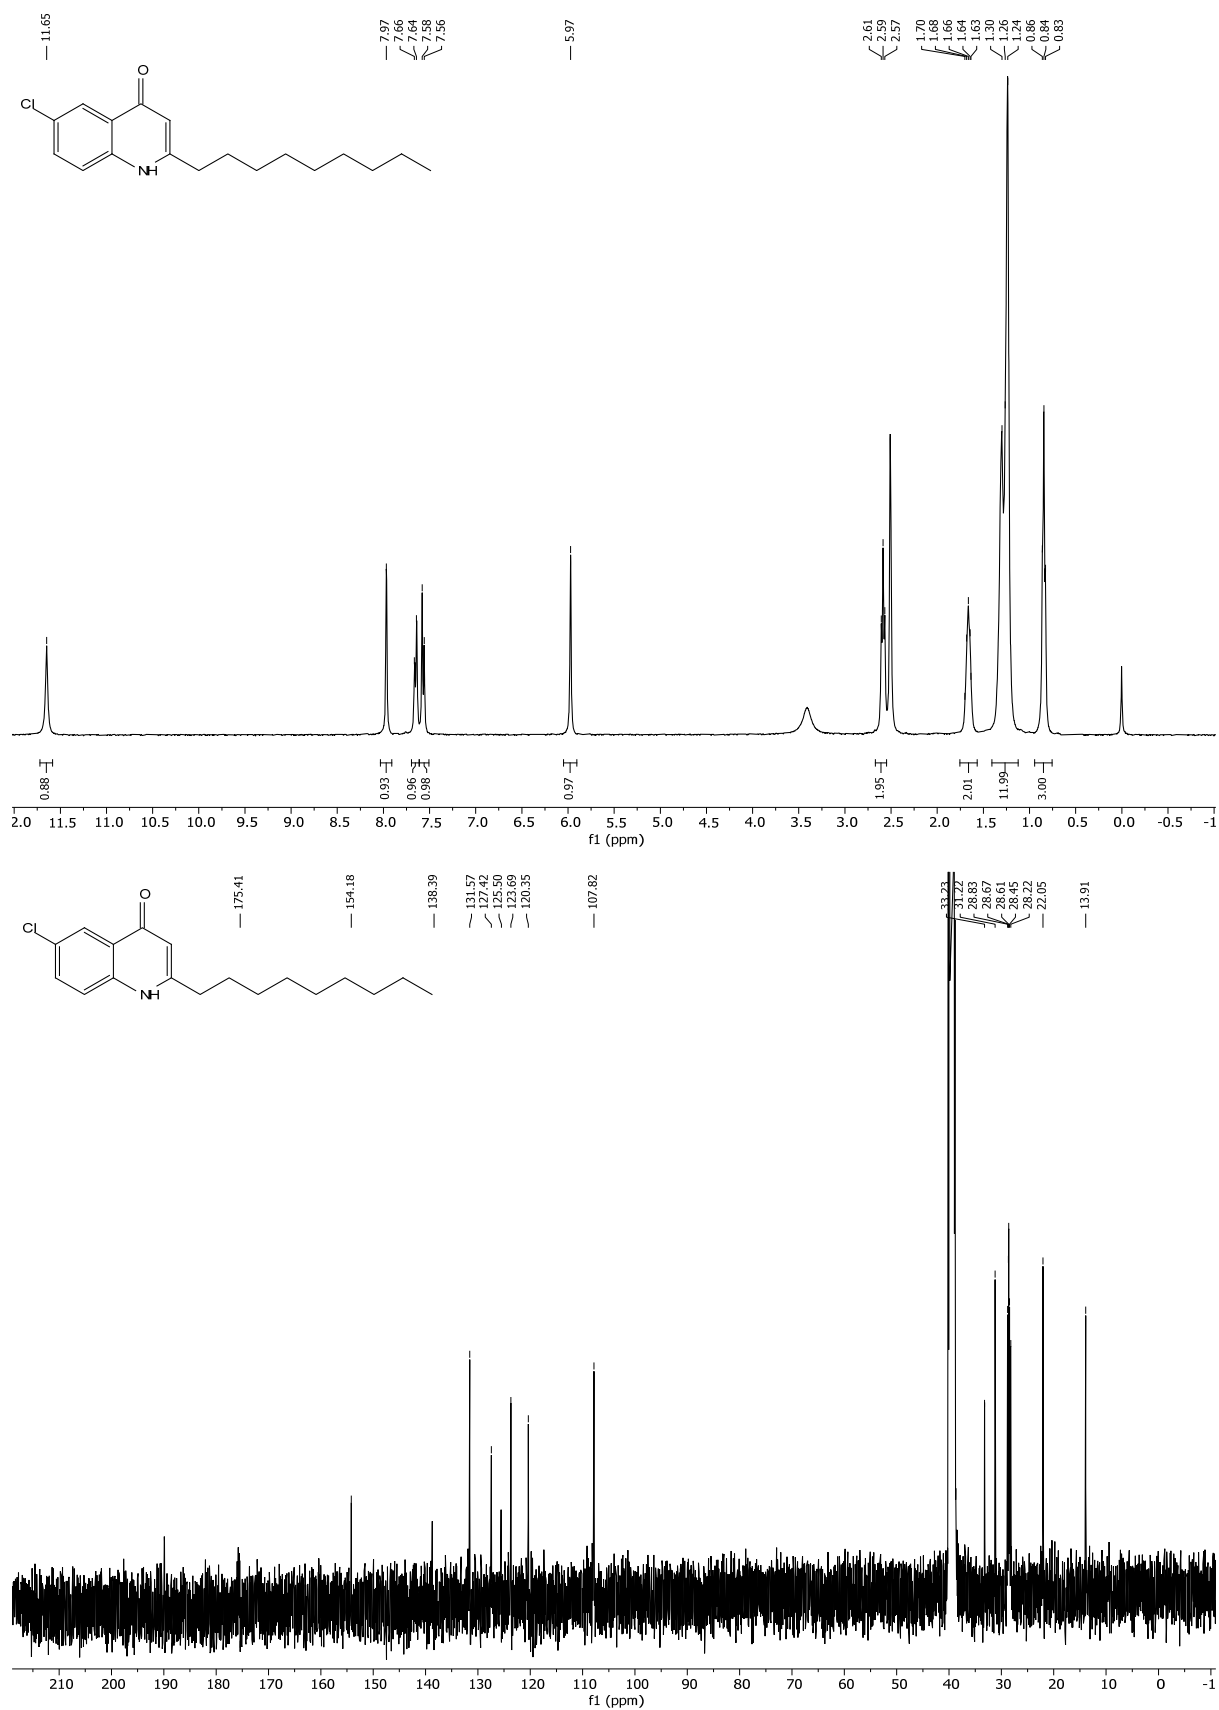

Figure SA1.  $^1\text{H}$ -NMR and  $^{13}\text{C}$ -NMR spectra of 6Cl-NQ in  $\text{DMSO}-d_6$ .

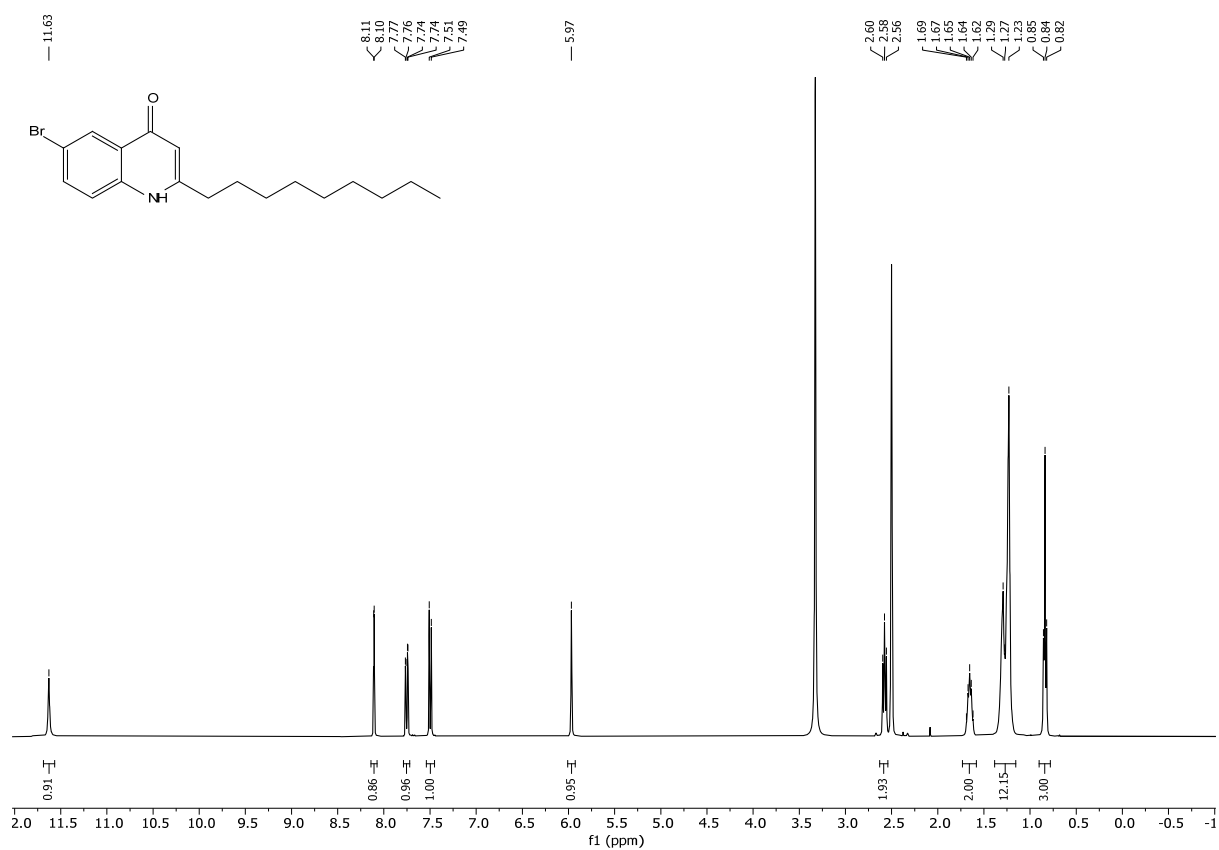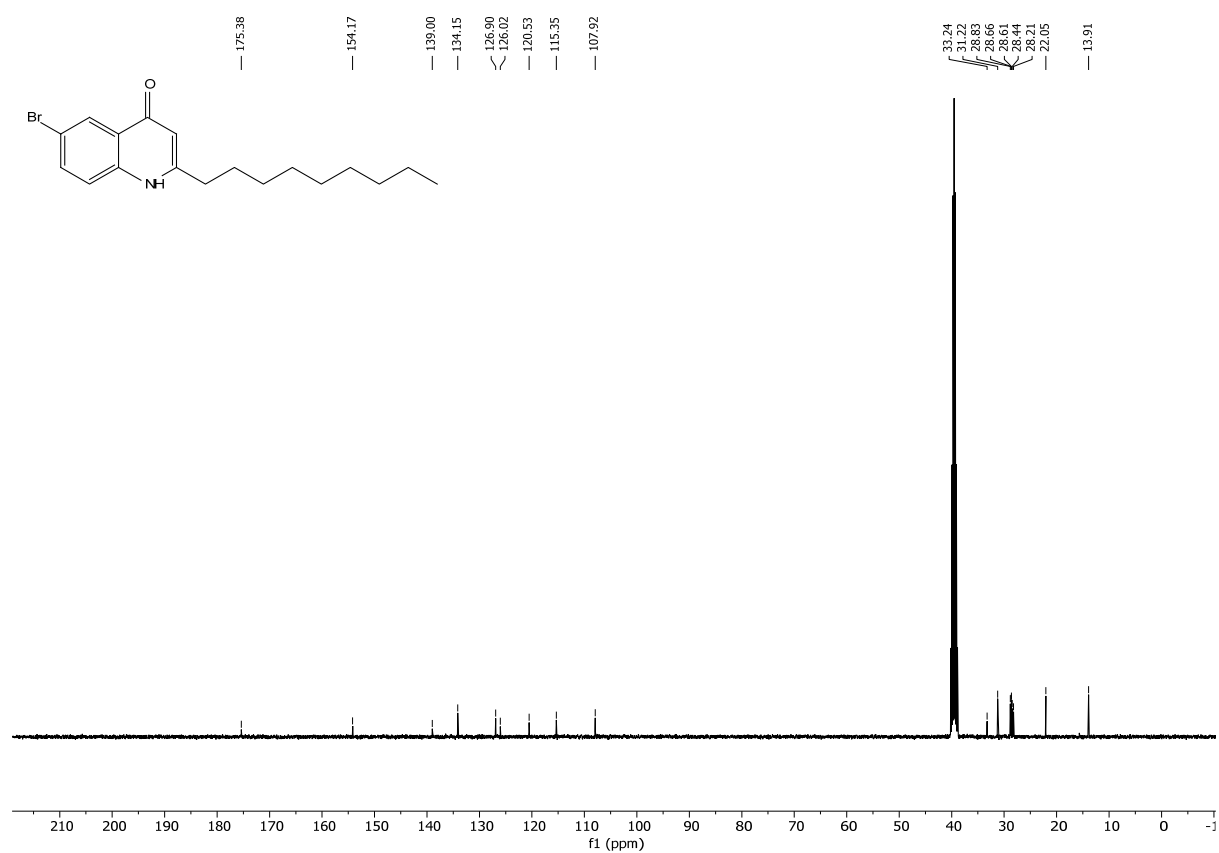

Figure SA2.  $^1\text{H}$ -NMR and  $^{13}\text{C}$ -NMR spectra of 6Br-NQ in  $\text{DMSO}-d_6$ .

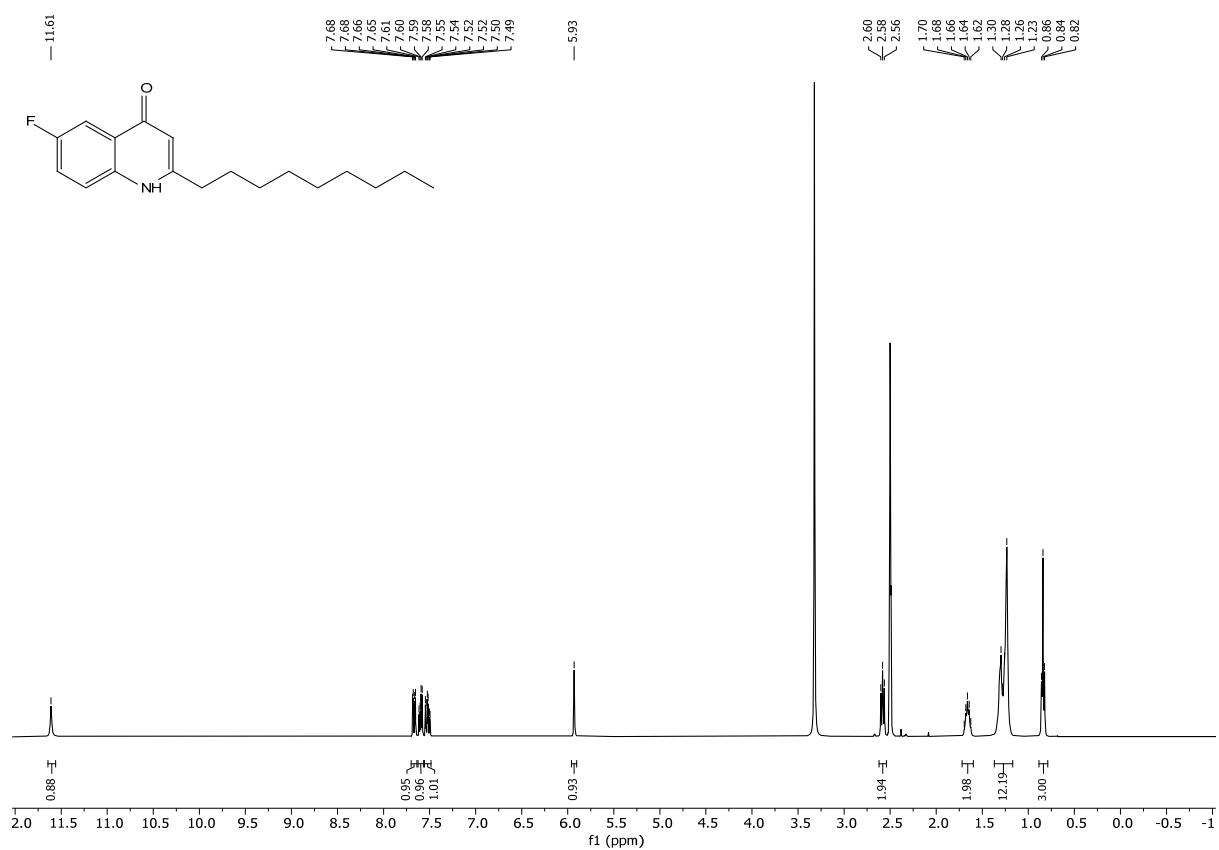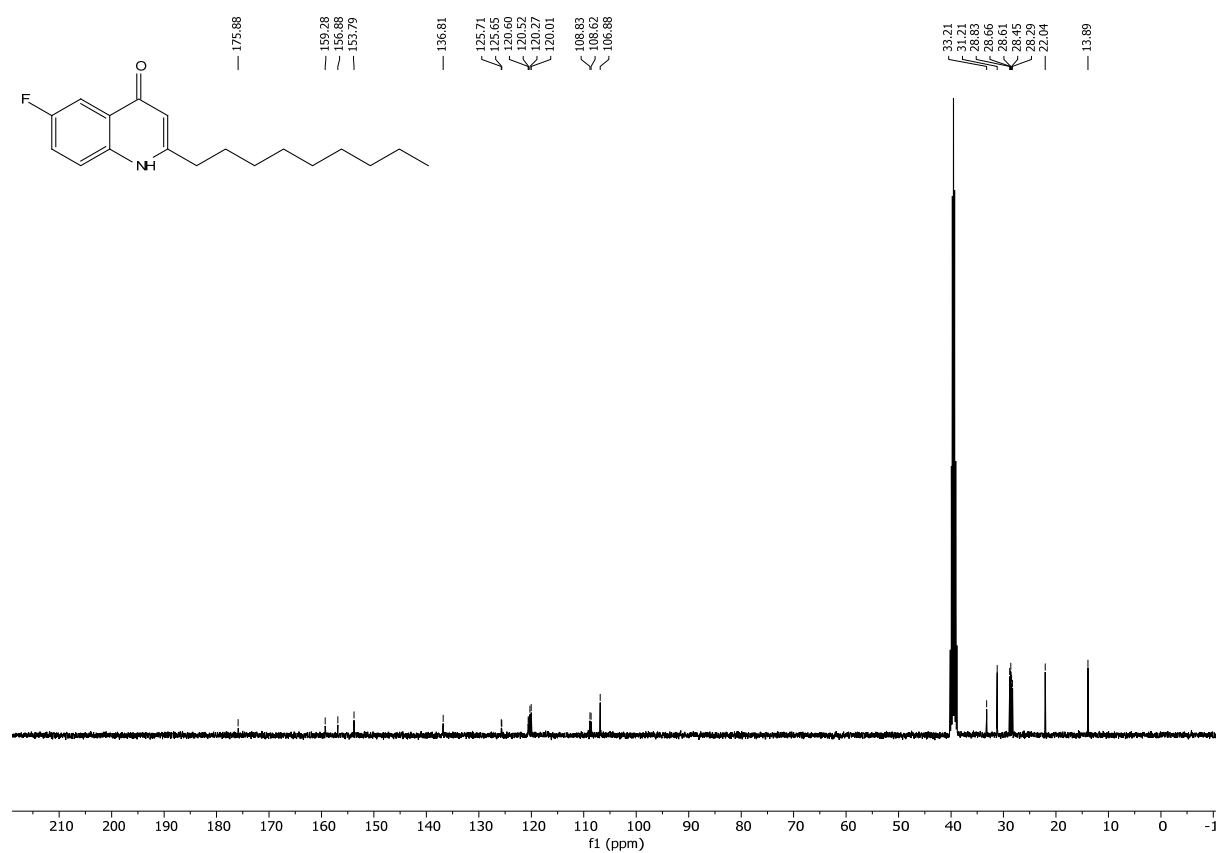

**Figure SA3.** <sup>1</sup>H-NMR and <sup>13</sup>C-NMR spectra of **6F-NQ** in DMSO-*d*<sub>6</sub>.

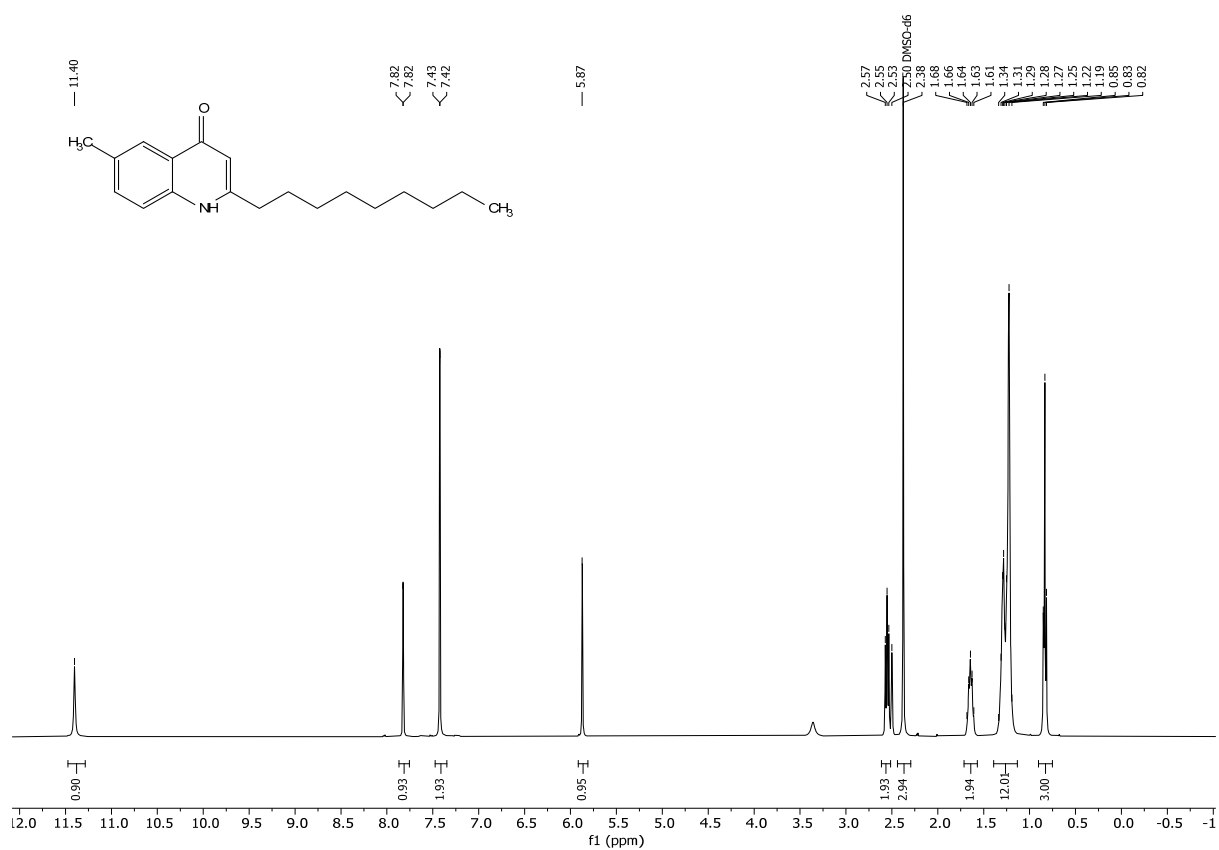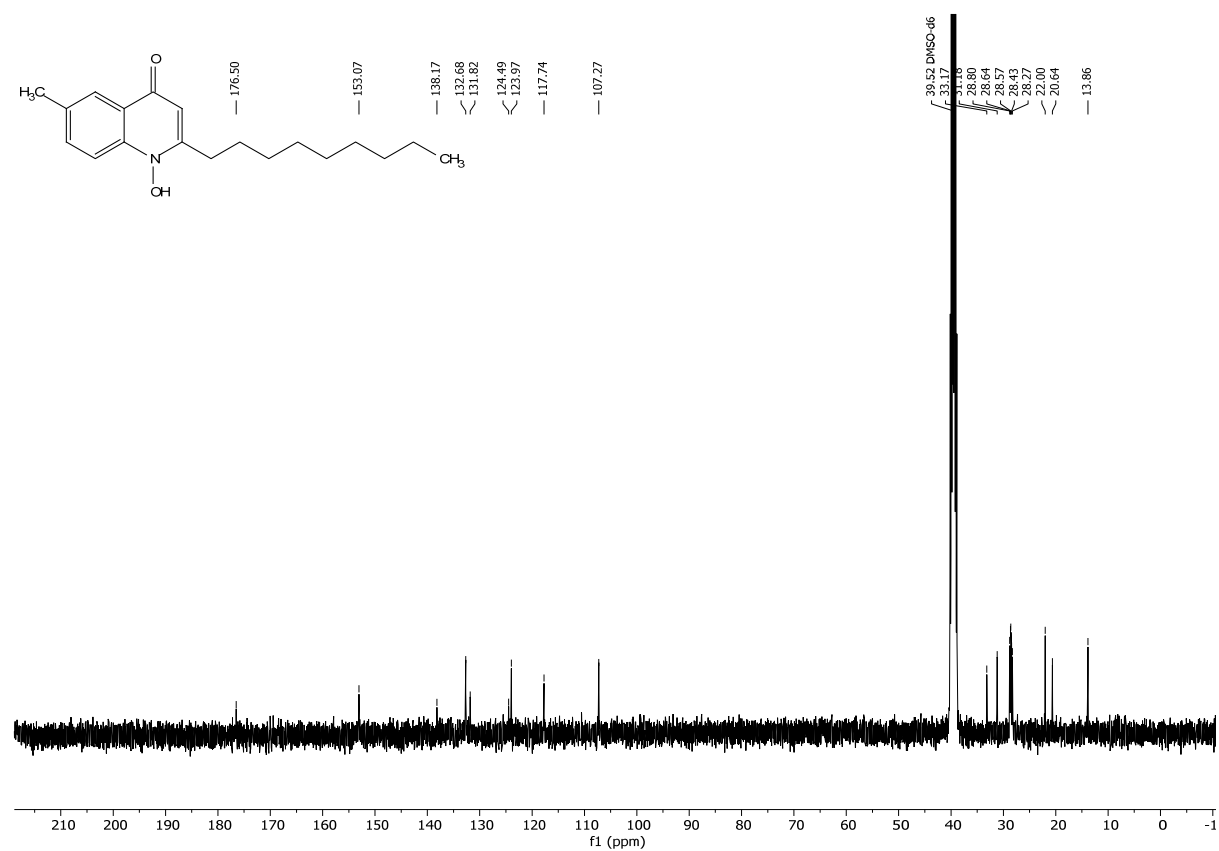

**Figure SA4.** <sup>1</sup>H-NMR and <sup>13</sup>C-NMR spectra of 6Me-NQ in DMSO-*d*<sub>6</sub>.

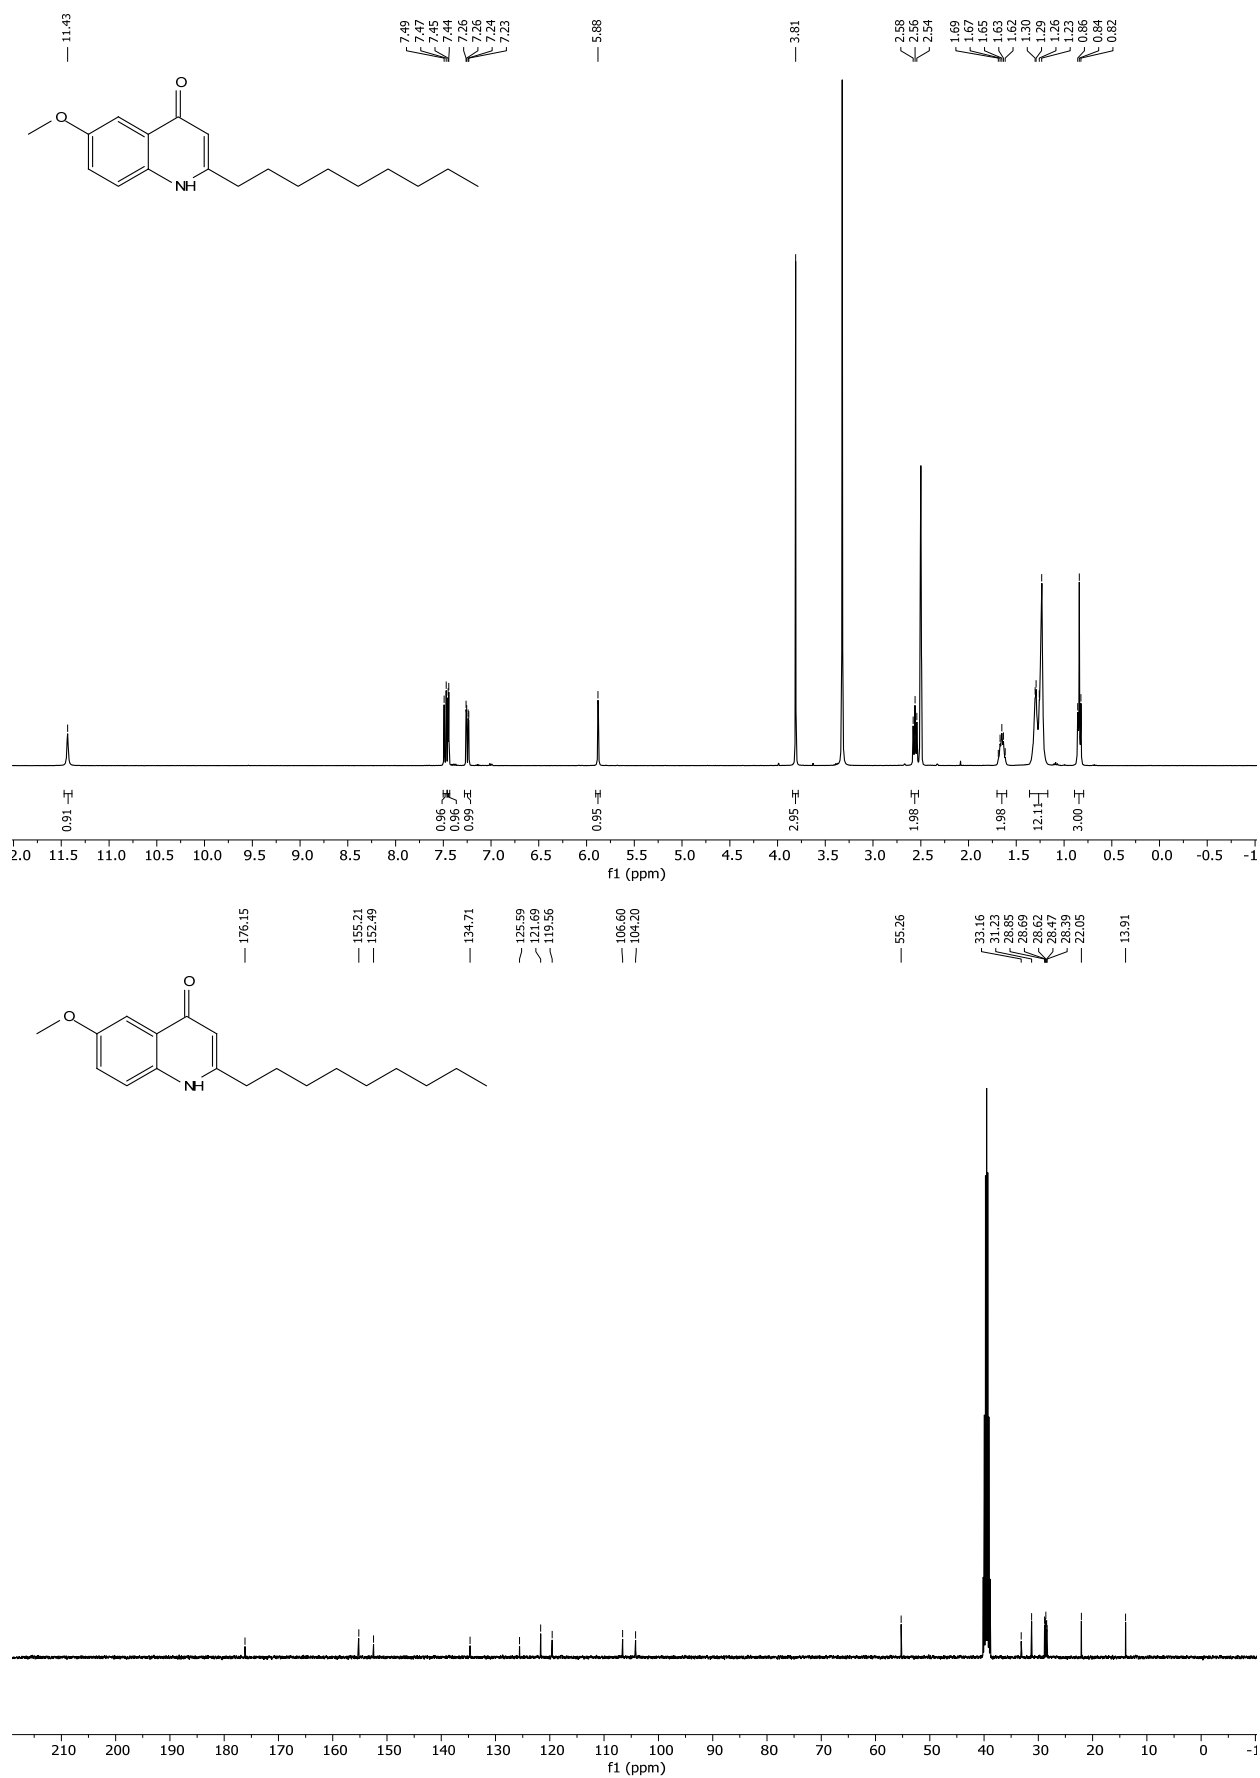

Figure SA5.  $^1\text{H}$ -NMR and  $^{13}\text{C}$ -NMR spectra of 6OMe-NQ in DMSO- $d_6$ .

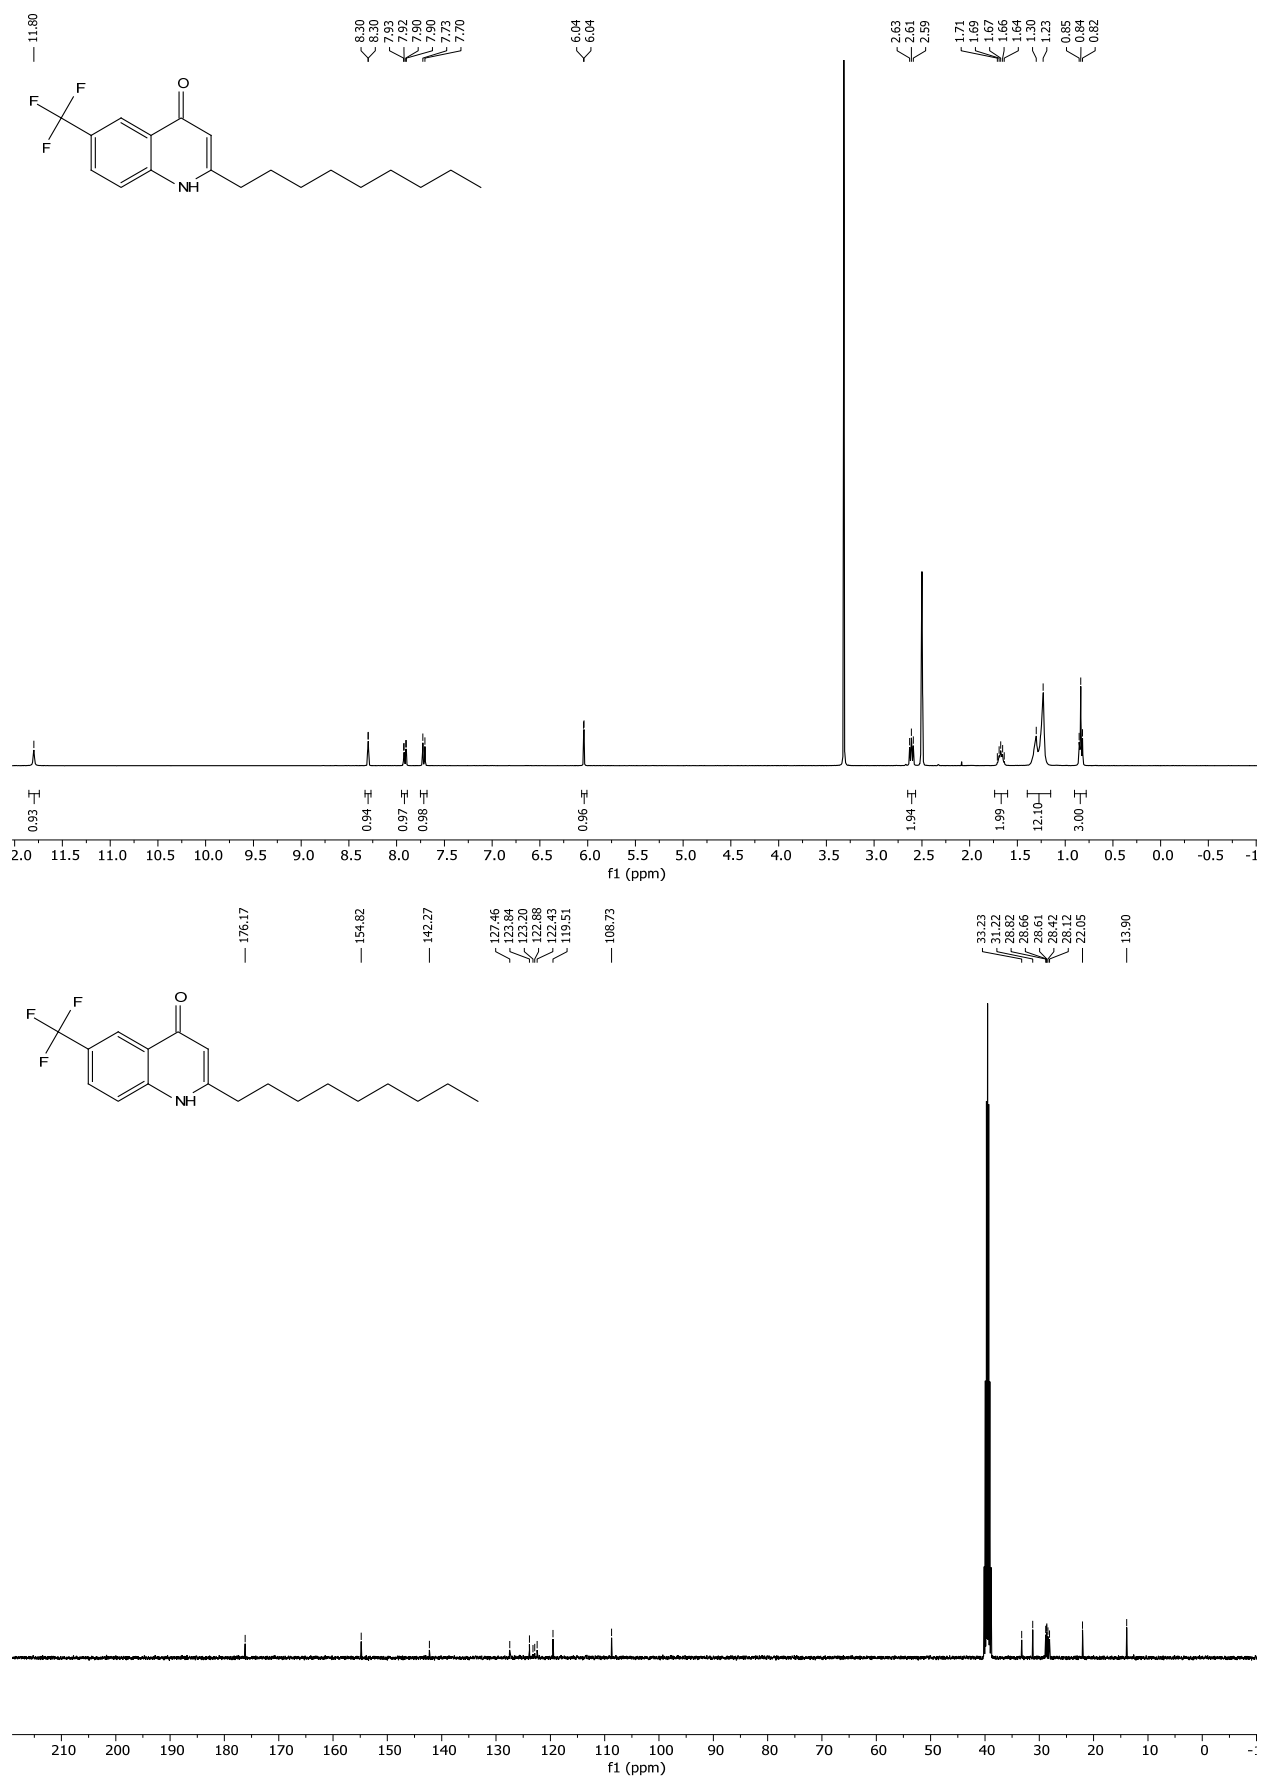

Figure SA6. <sup>1</sup>H-NMR and <sup>13</sup>C-NMR spectra of 6CF<sub>3</sub>-NQ in DMSO-d<sub>6</sub>.

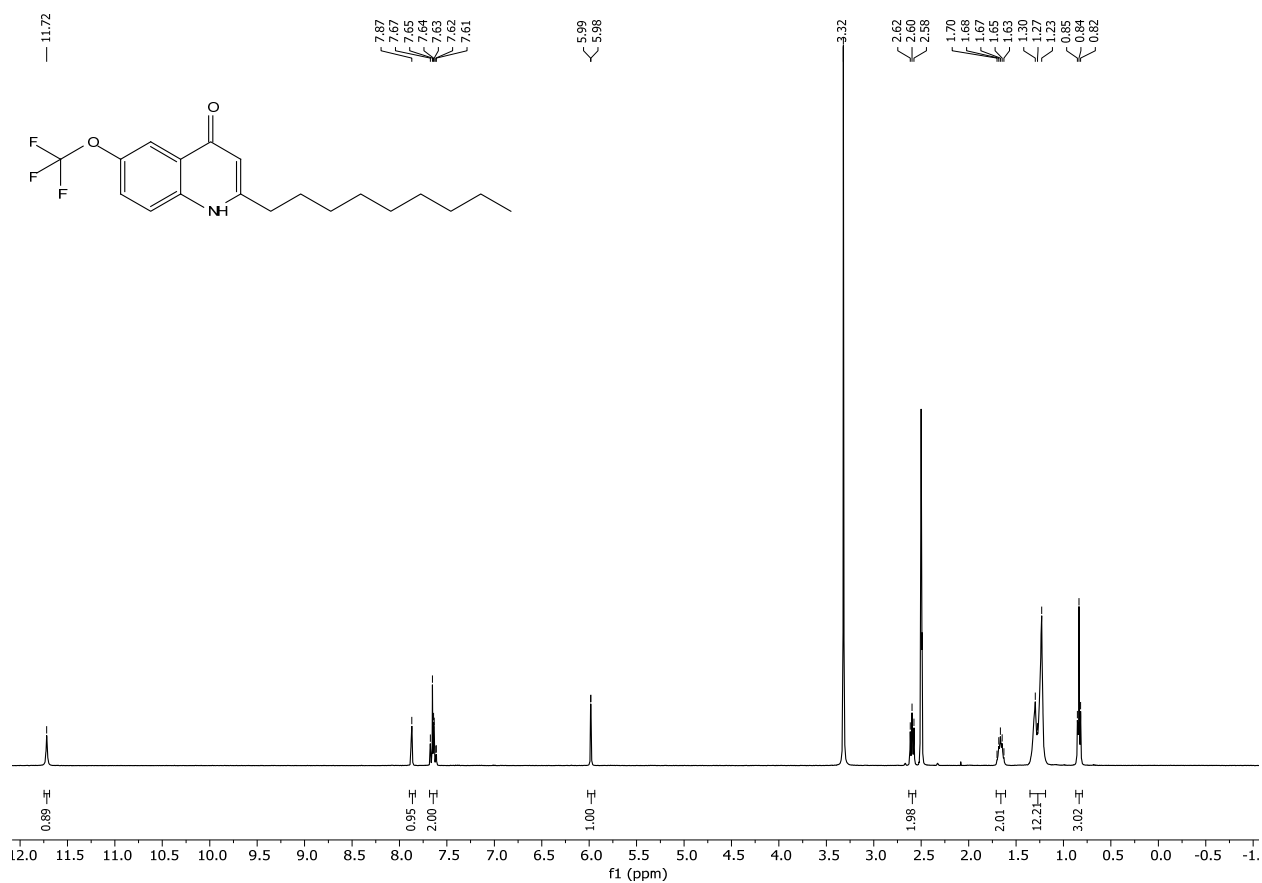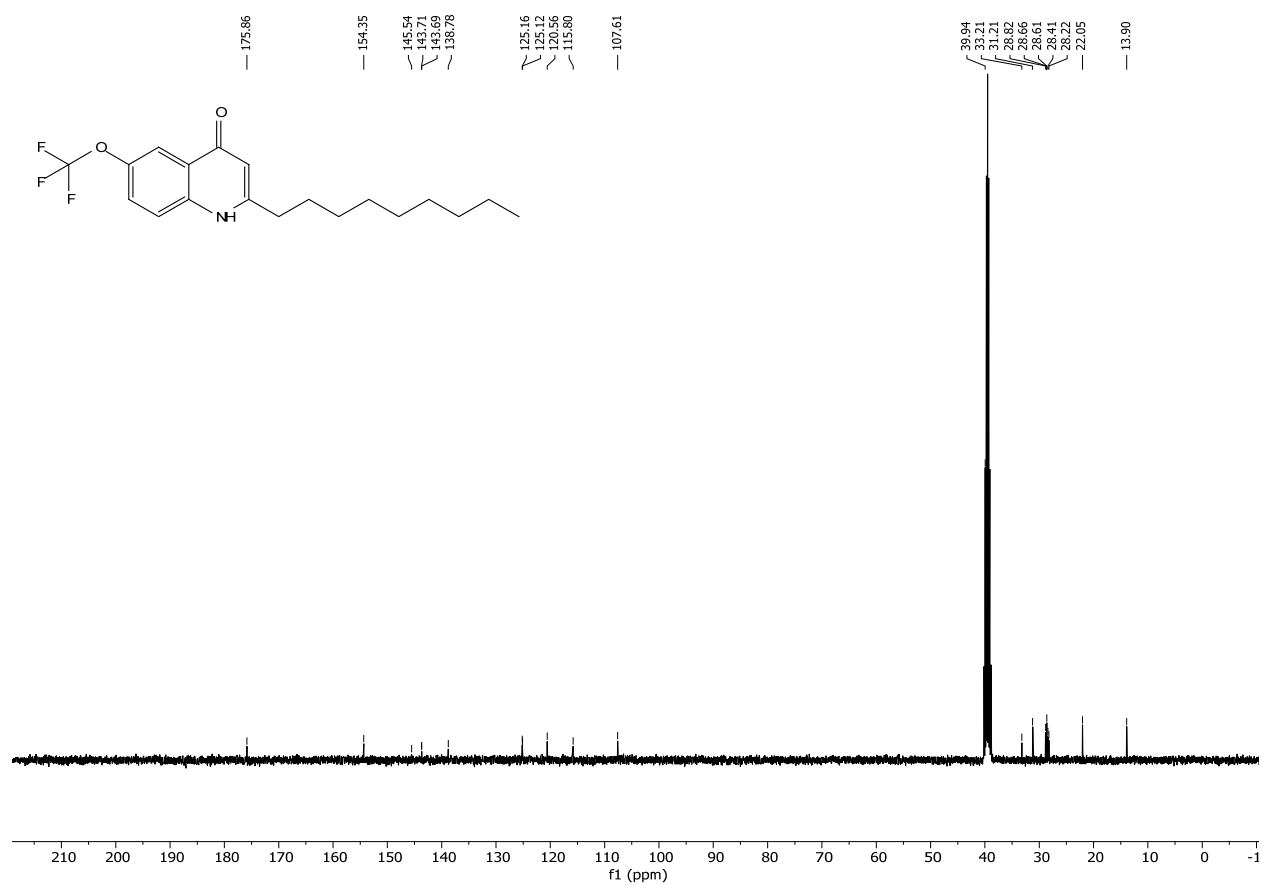

**Figure SA7.** <sup>1</sup>H-NMR and <sup>13</sup>C-NMR spectra of 6OCF<sub>3</sub>-NQ in DMSO-*d*<sub>6</sub>.

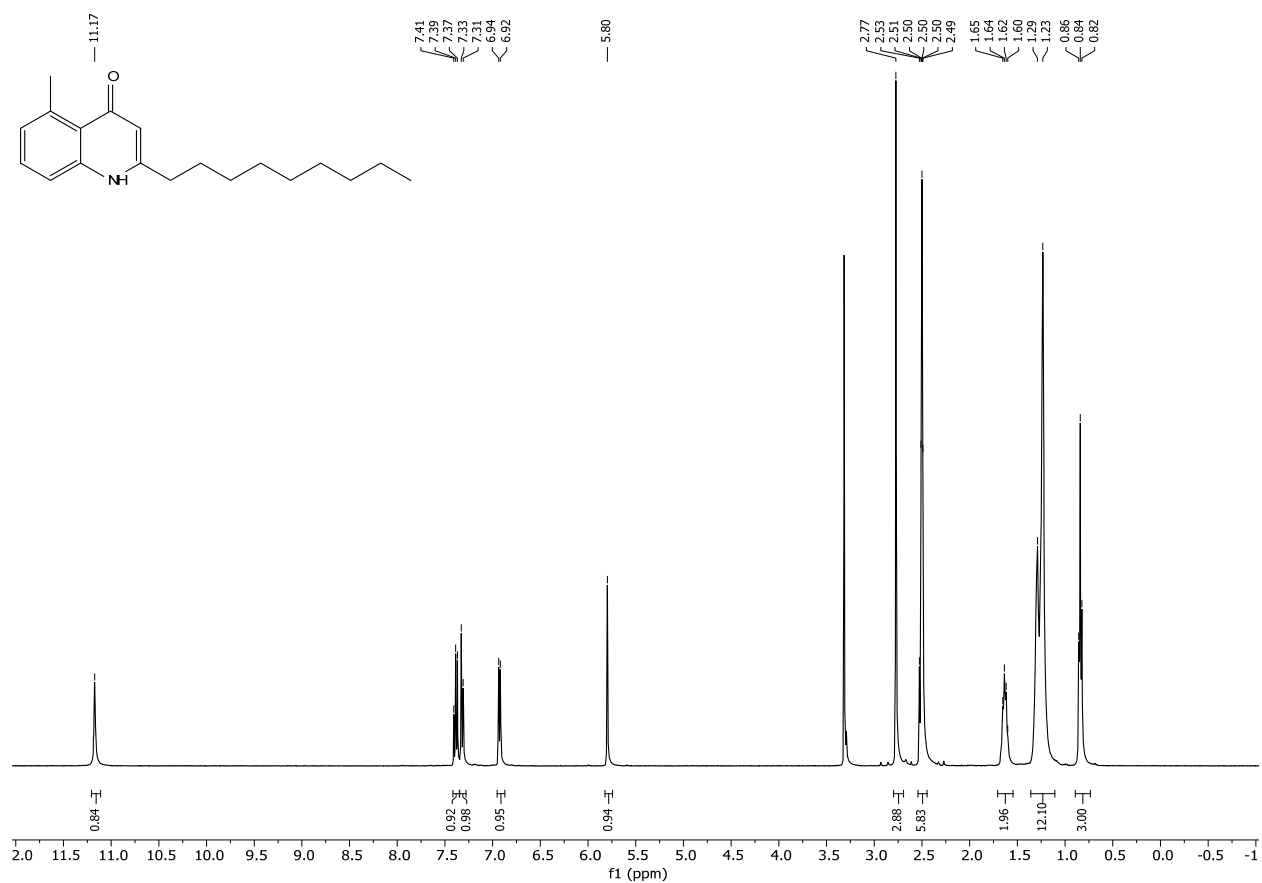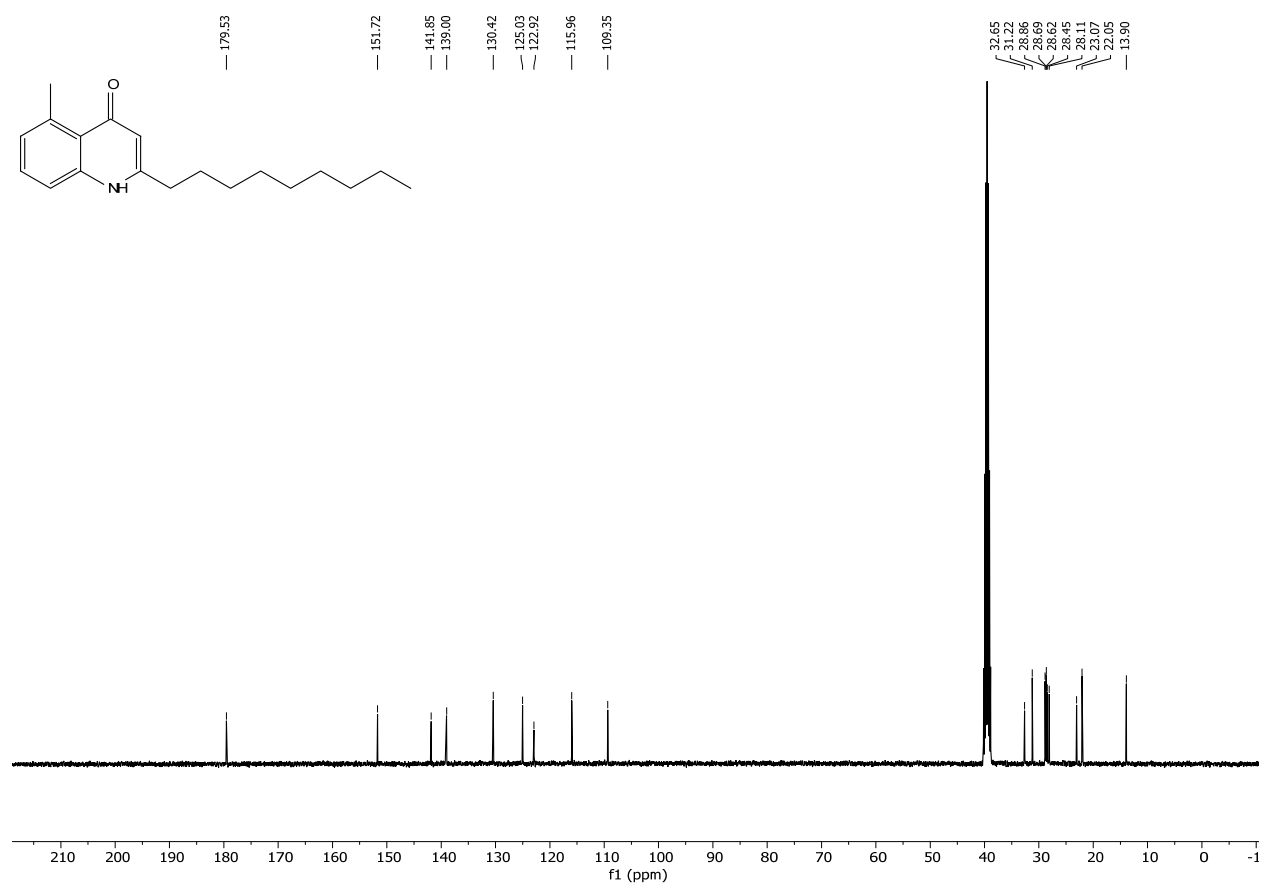

**Figure SA8.**  $^1\text{H}$ -NMR and  $^{13}\text{C}$ -NMR spectra of 5Me-NQ in  $\text{DMSO}-d_6$ .



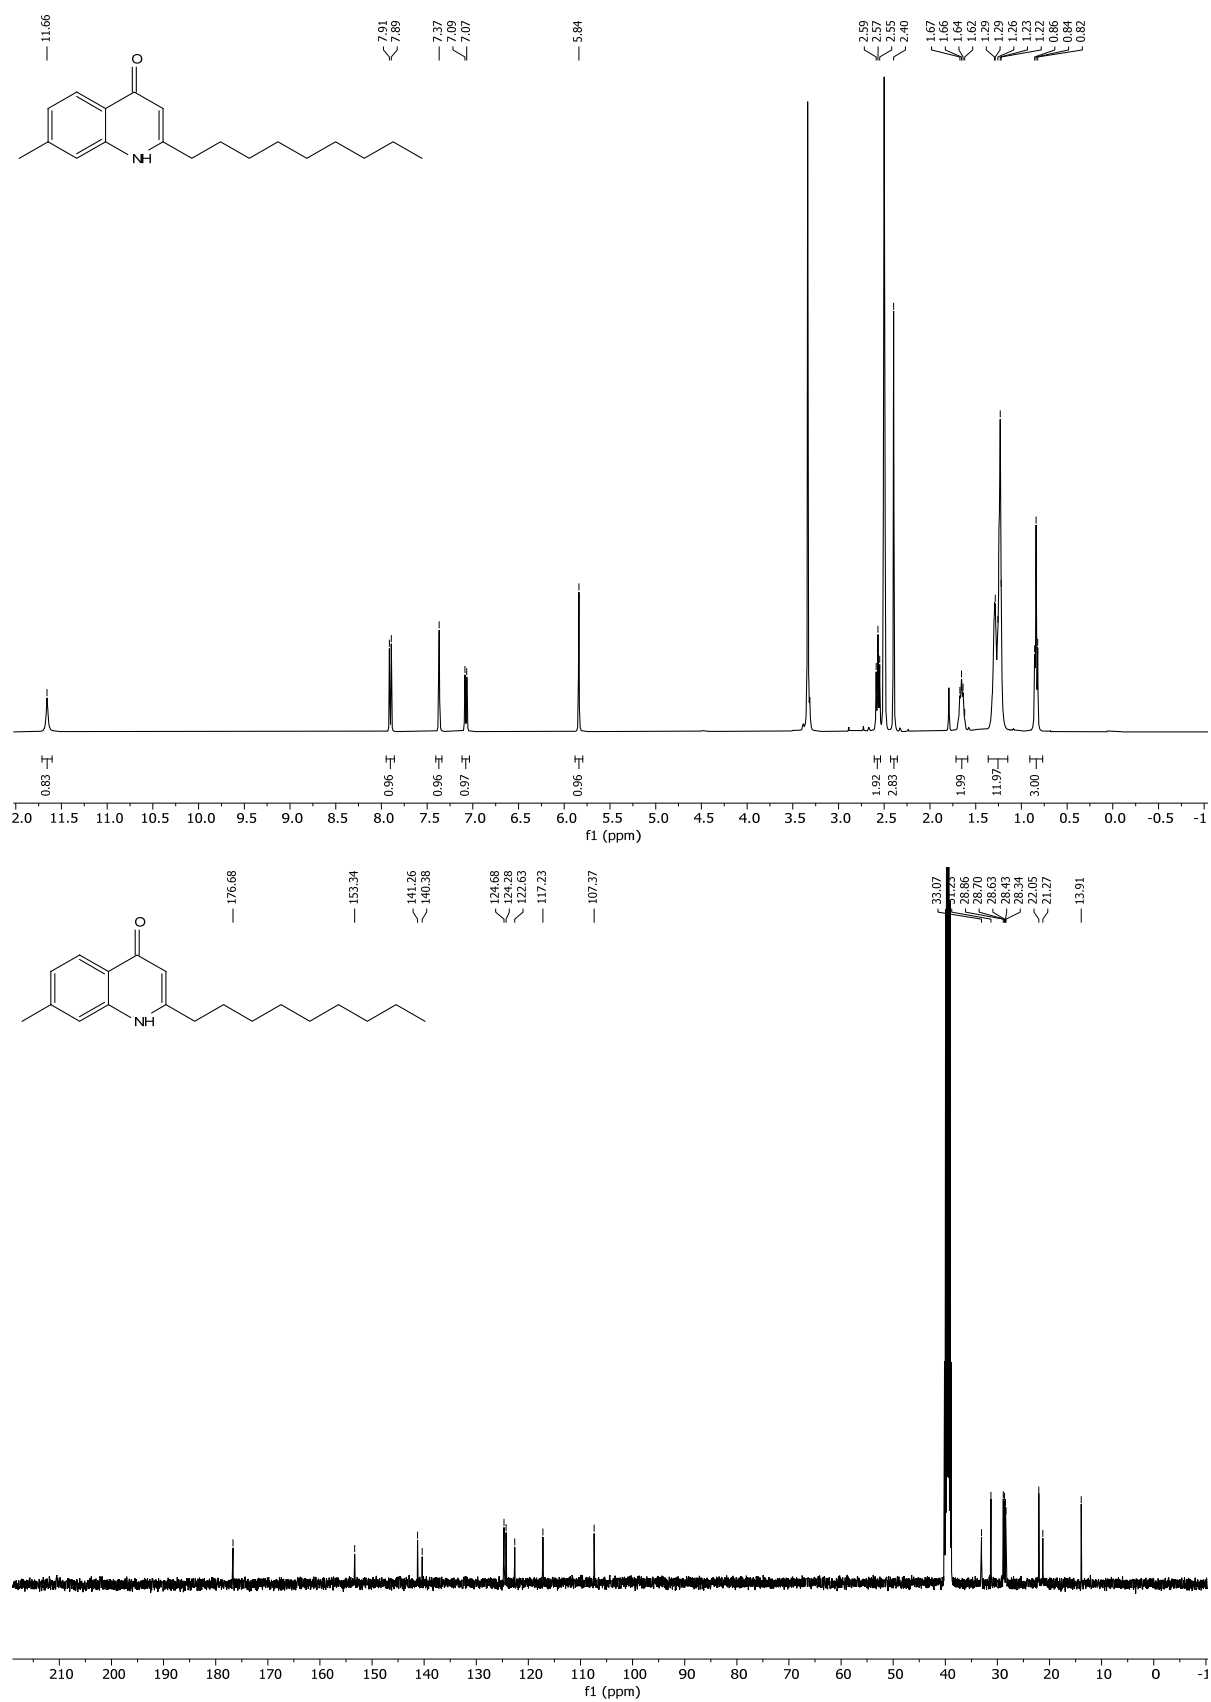

**Figure SA9.**  $^1\text{H}$ -NMR and  $^{13}\text{C}$ -NMR spectra of 7Me-NQ in DMSO- $d_6$ .

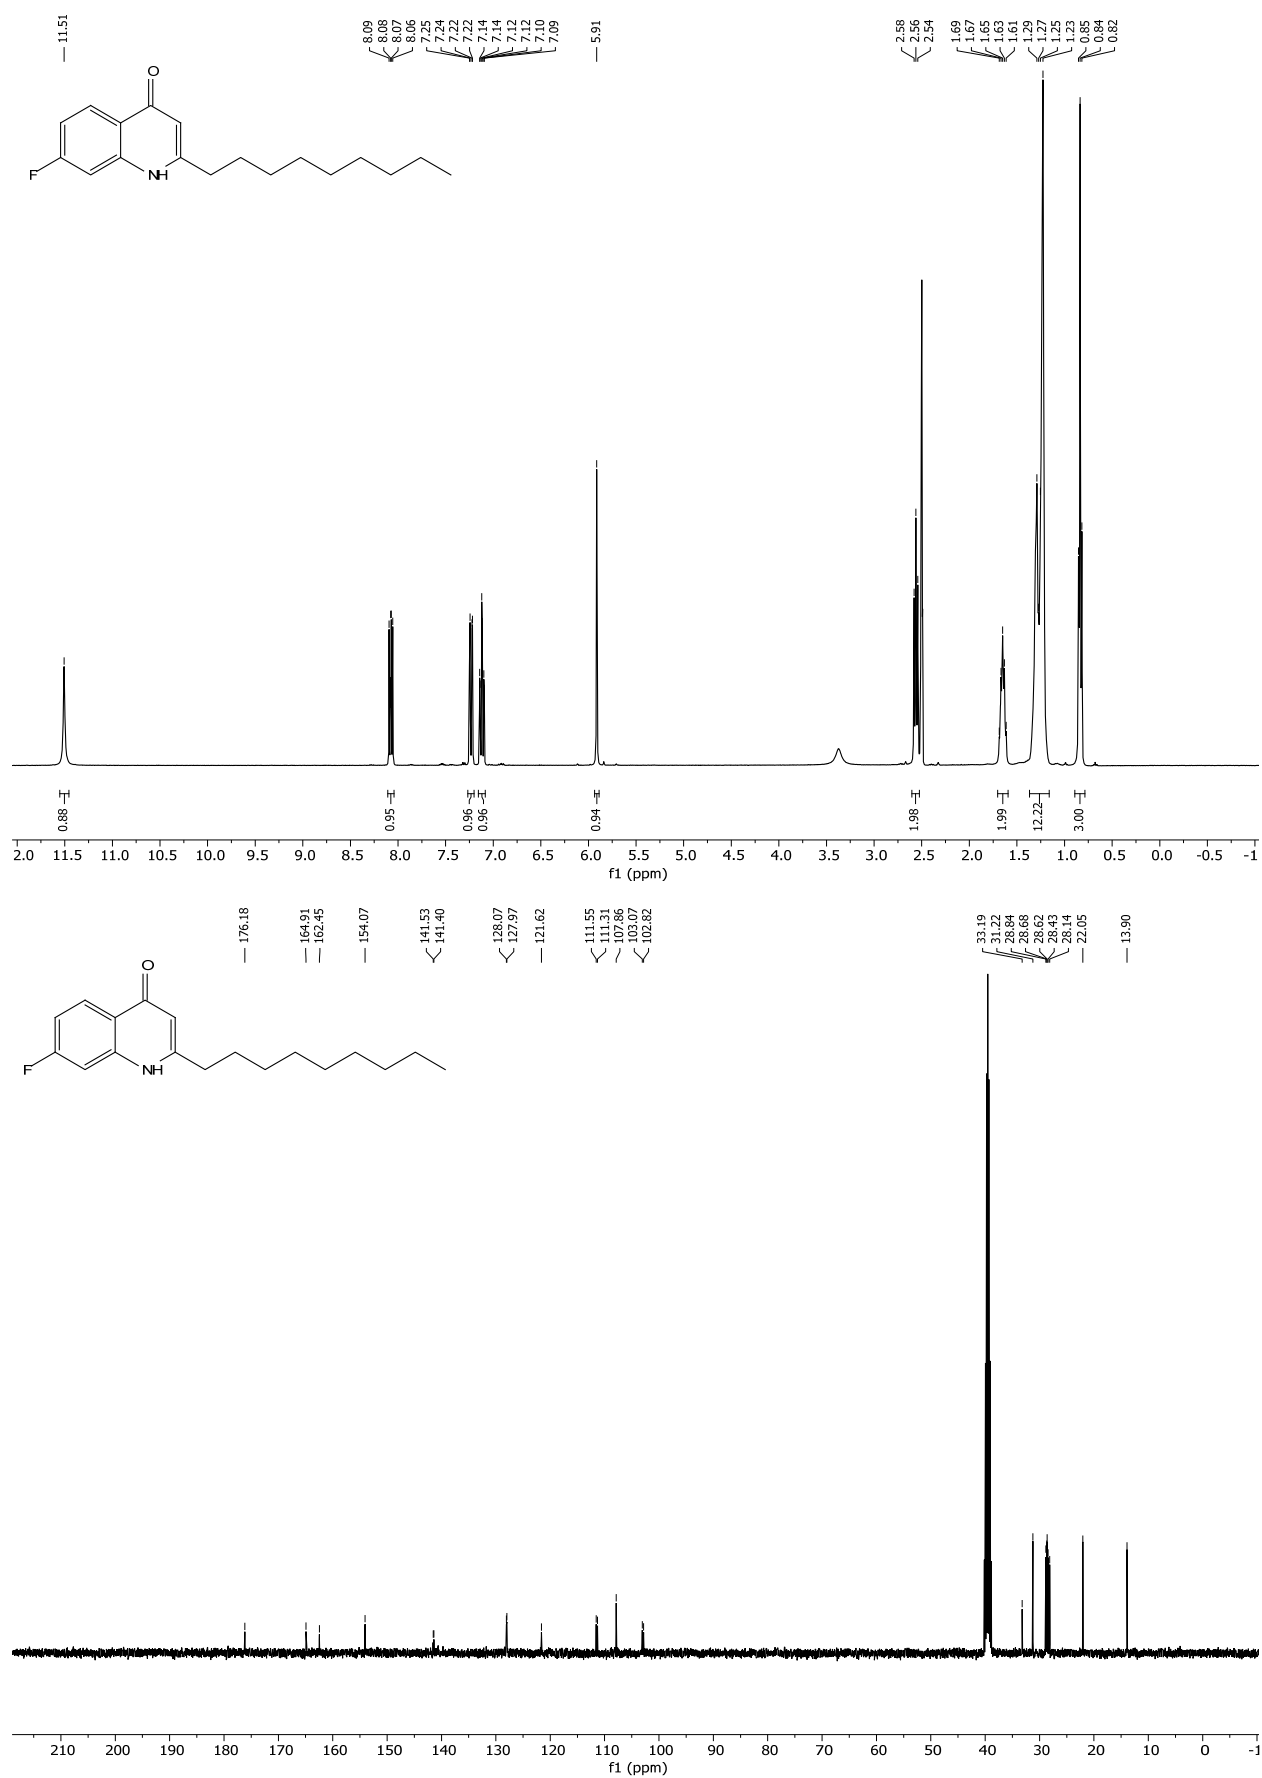

Figure SA10.  $^1\text{H}$ -NMR and  $^{13}\text{C}$ -NMR spectra of 7F-NQ in DMSO- $d_6$ .

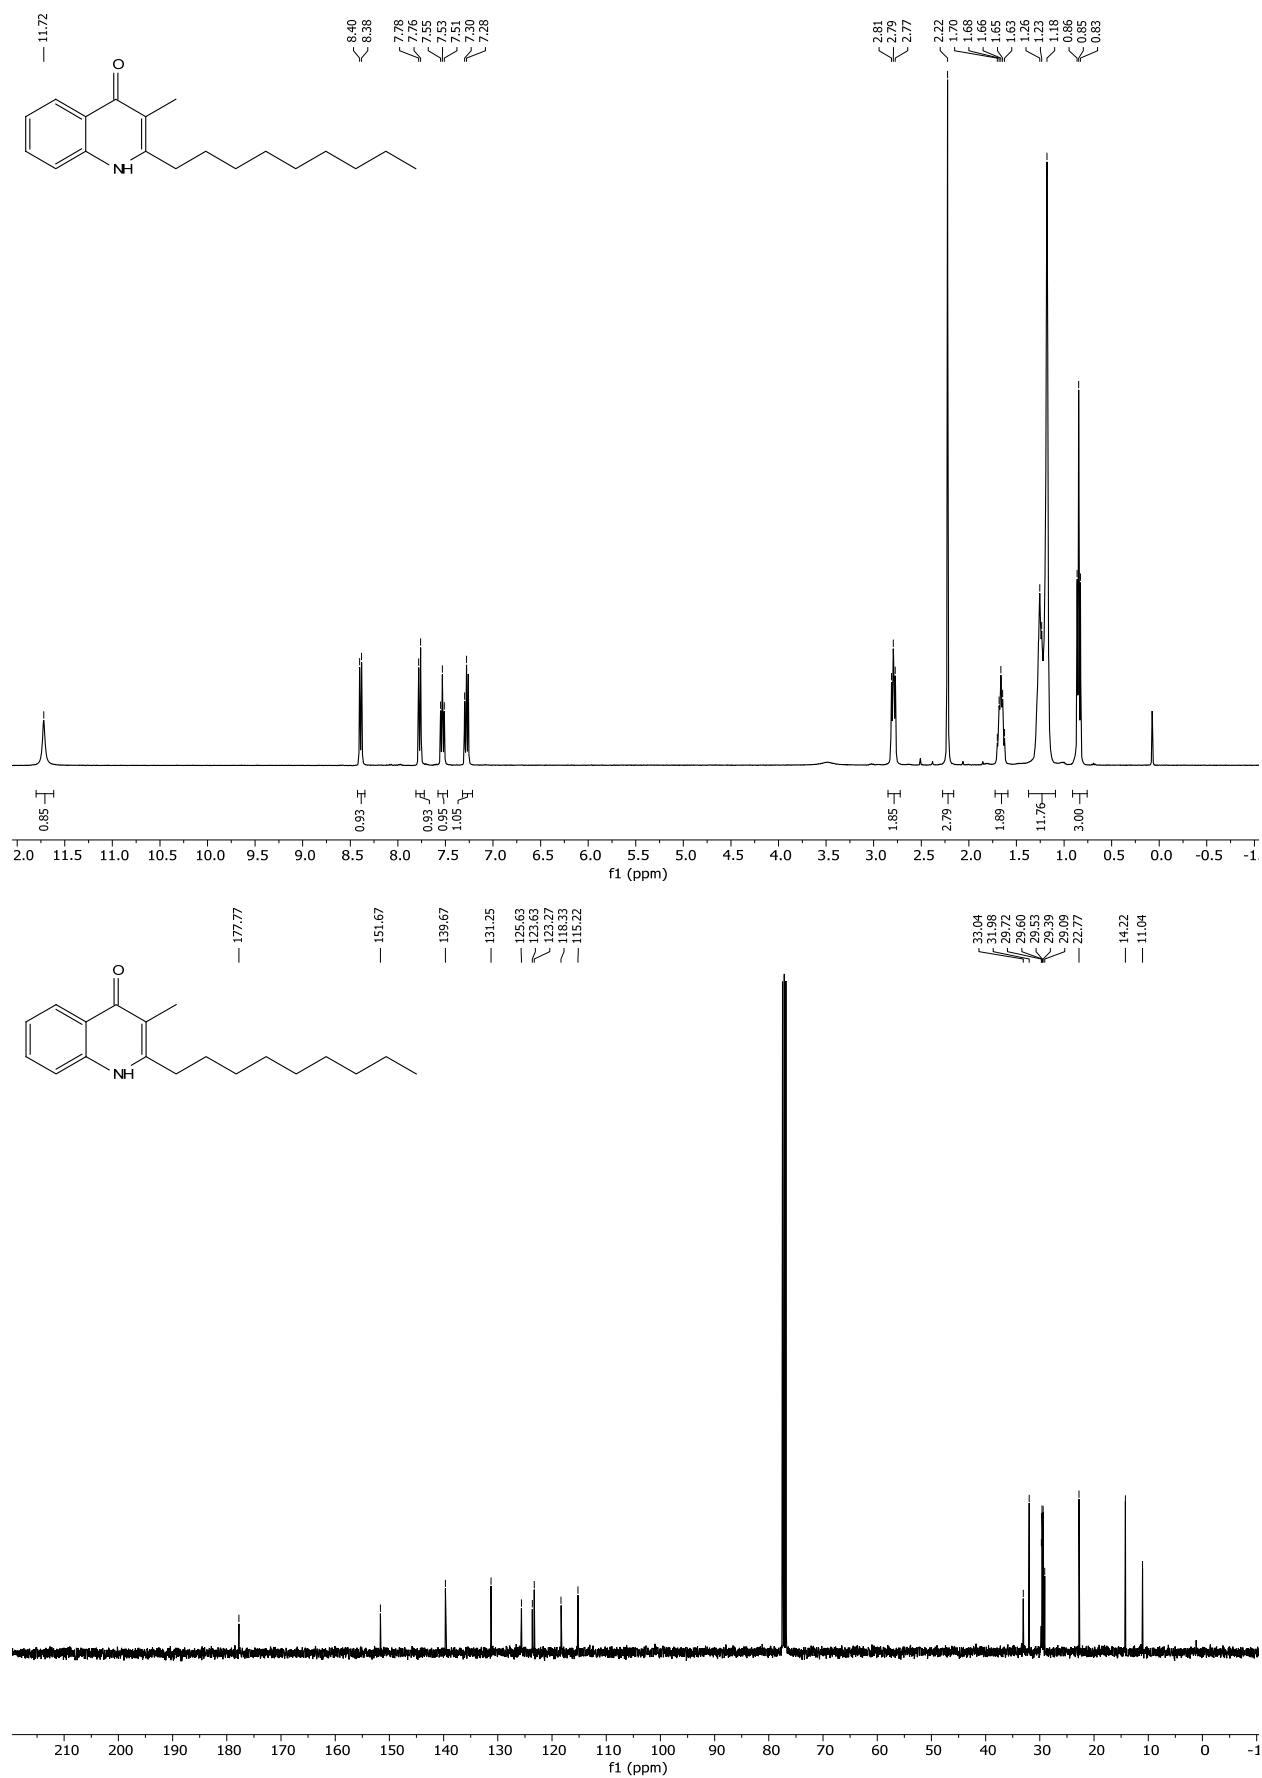

Figure SA11.  $^1\text{H}$ -NMR and  $^{13}\text{C}$ -NMR spectra of 3Me-NQ in  $\text{CDCl}_3\text{-}d$ .

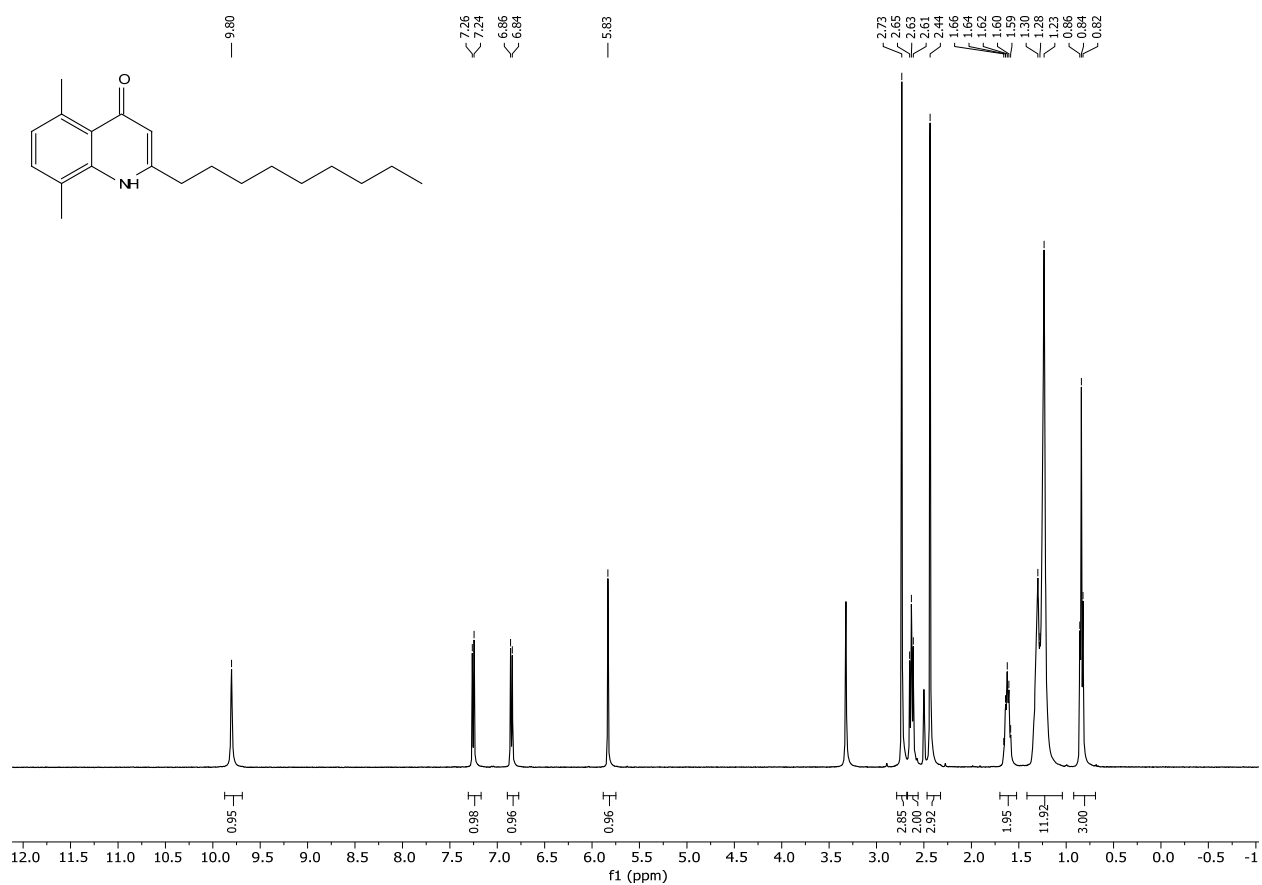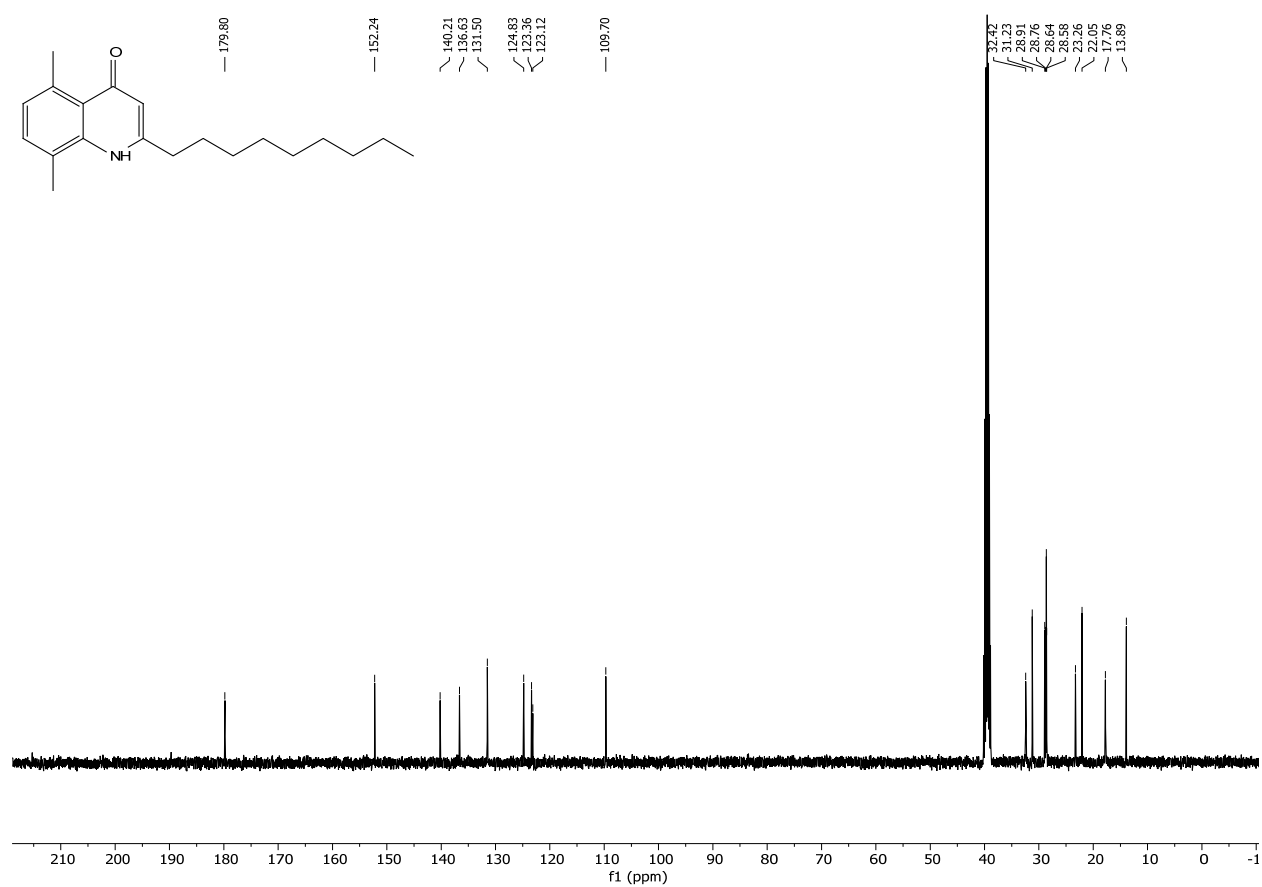

Figure SA12.  $^1\text{H}$ -NMR and  $^{13}\text{C}$ -NMR spectra of 5,8diMe-NQ in  $\text{DMSO}-d_6$ .

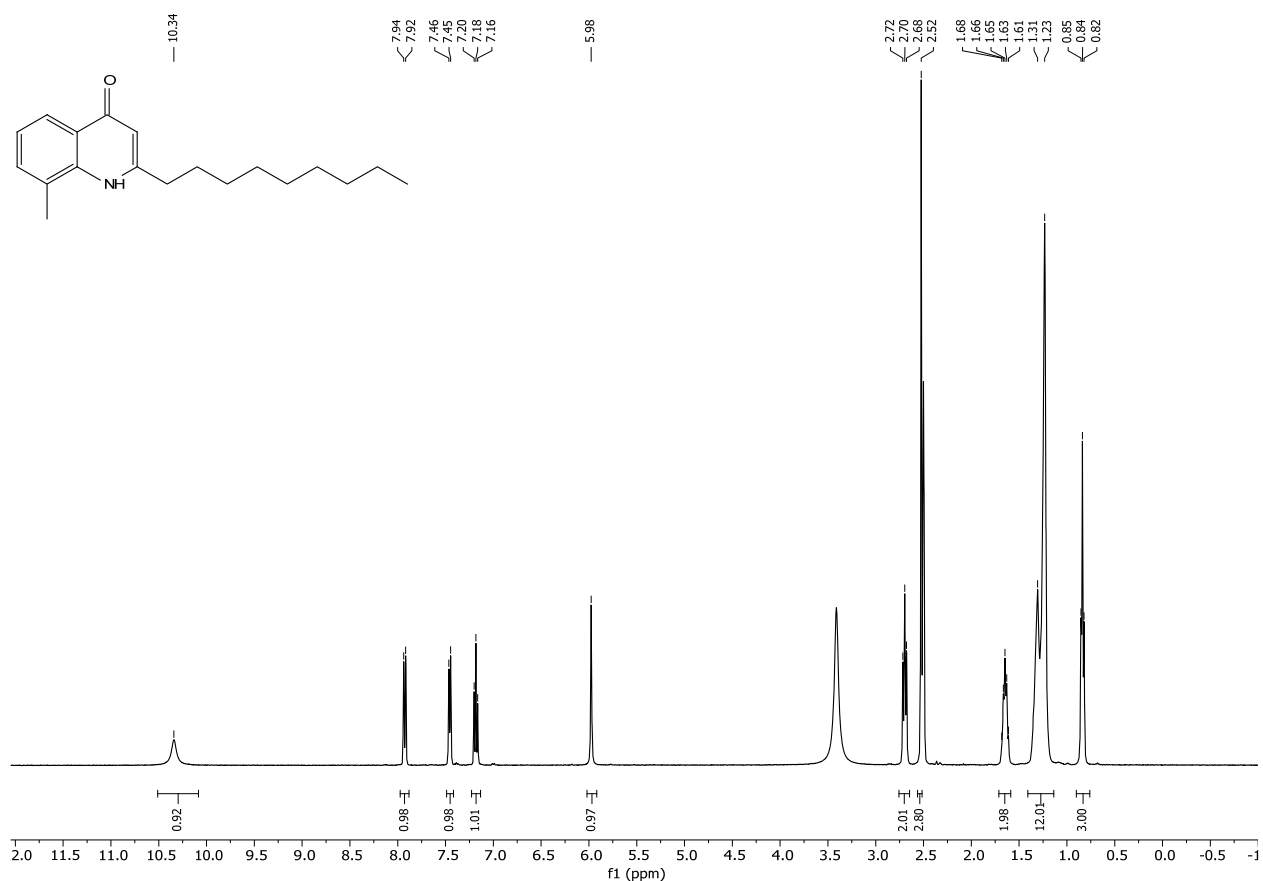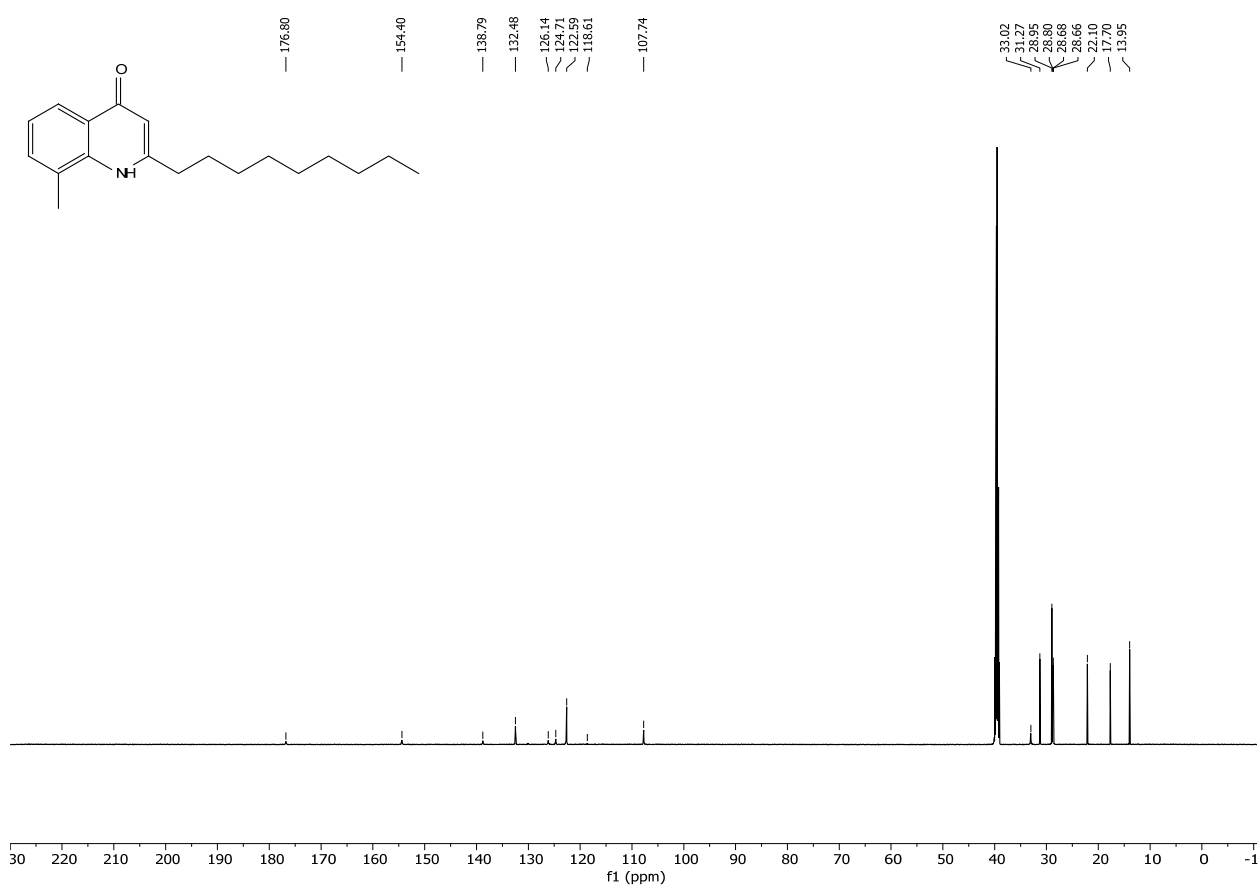

**Figure SA13.**  $^1\text{H}$ -NMR and  $^{13}\text{C}$ -NMR spectra of **8Me-NQ** in  $\text{DMSO-}d_6$ .

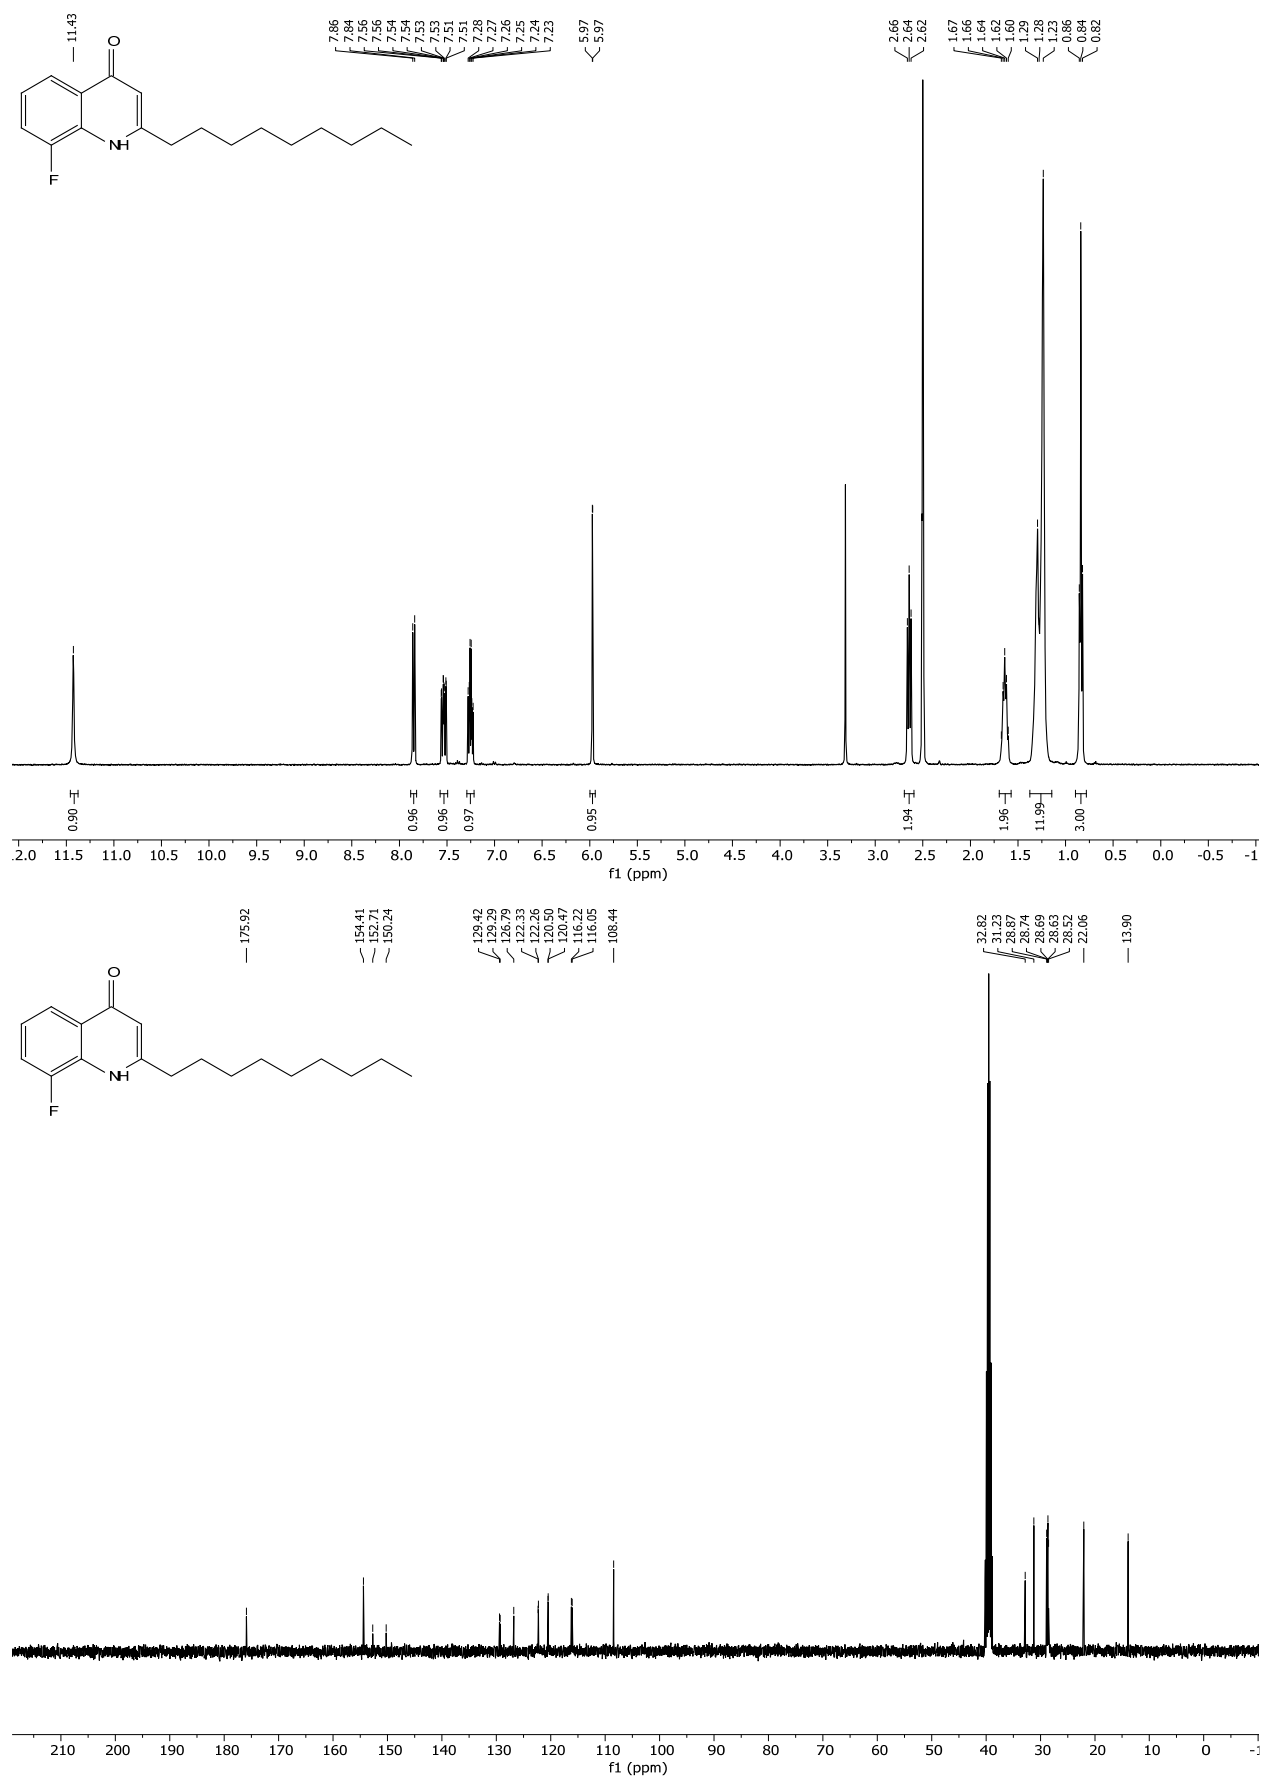

Figure SA14.  $^1\text{H}$ -NMR and  $^{13}\text{C}$ -NMR spectra of 8F-NQ in DMSO- $d_6$ .



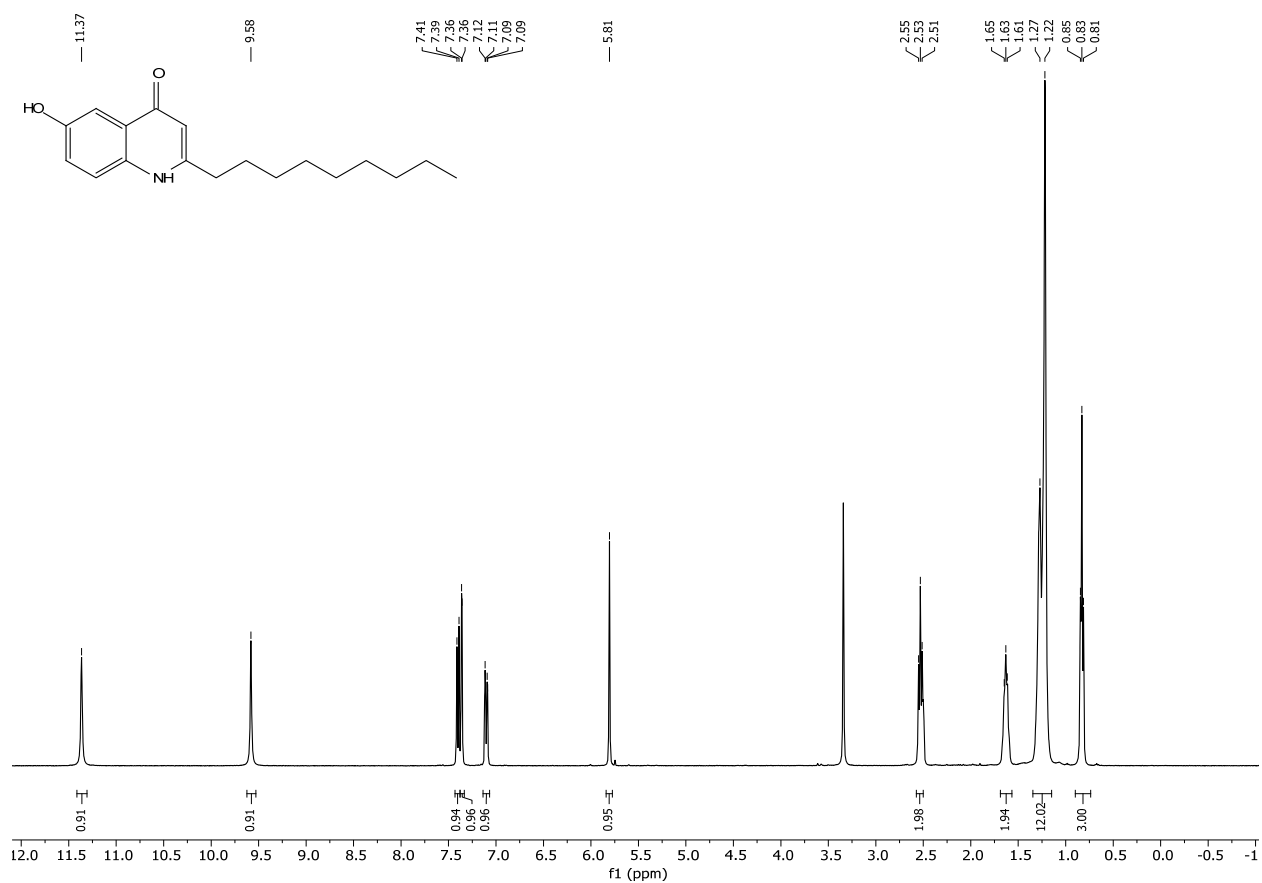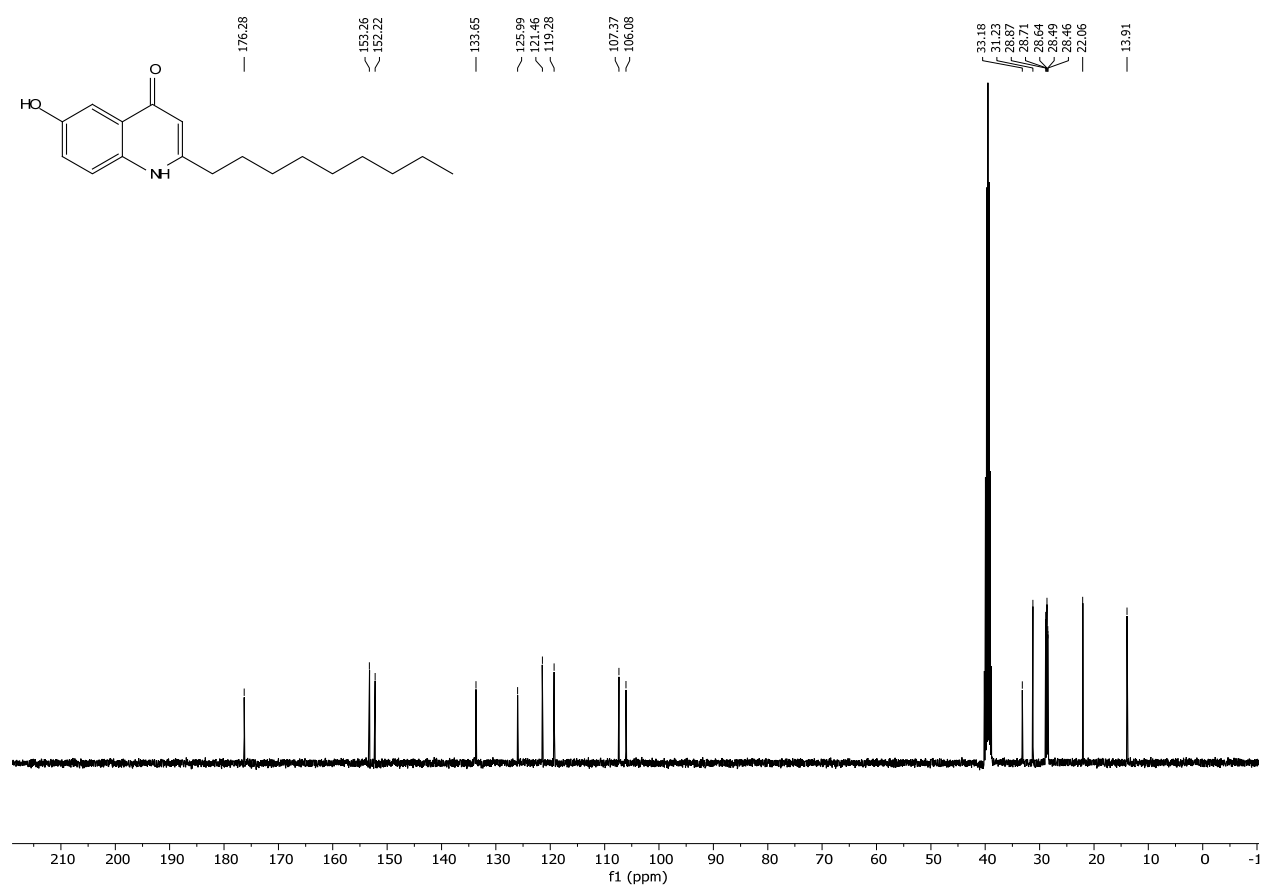

Figure SA16.  $^1\text{H}$ -NMR and  $^{13}\text{C}$ -NMR spectra of 6OH-NQ in DMSO- $d_6$ .





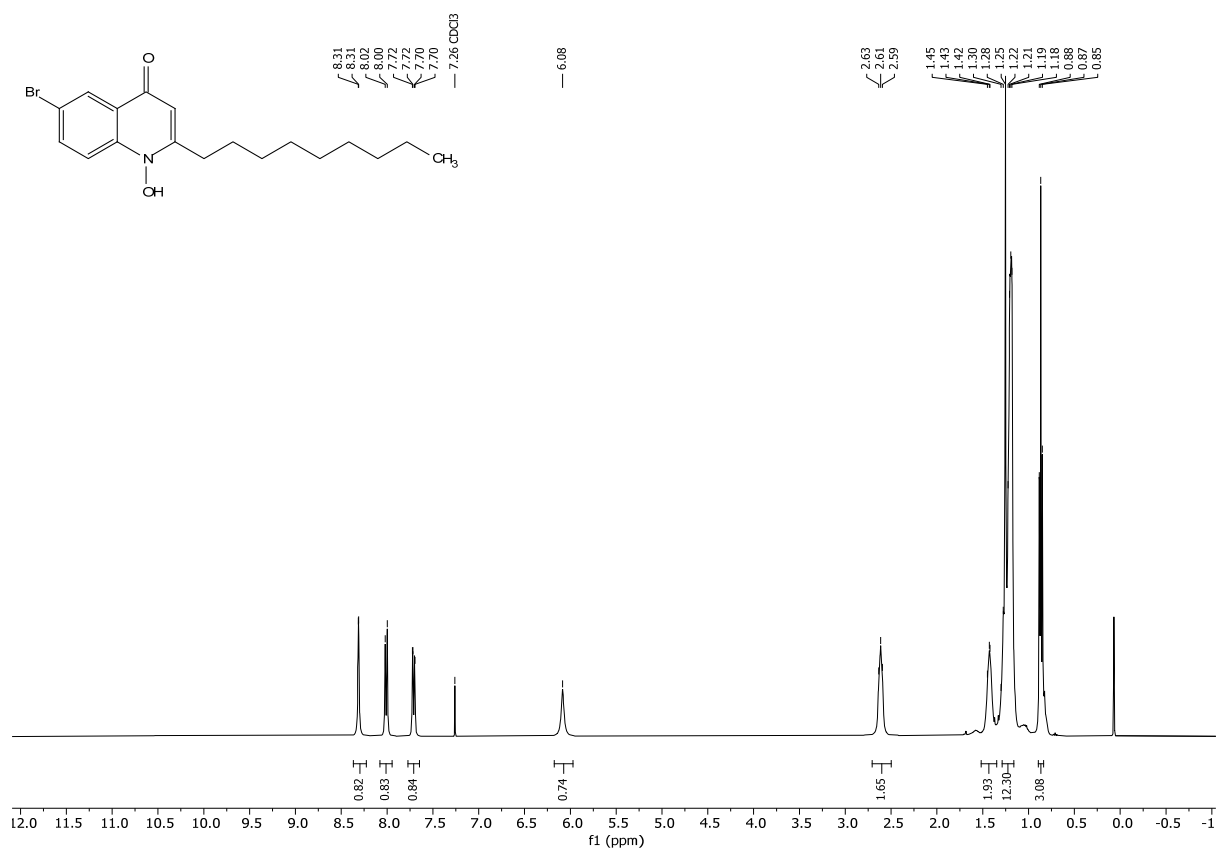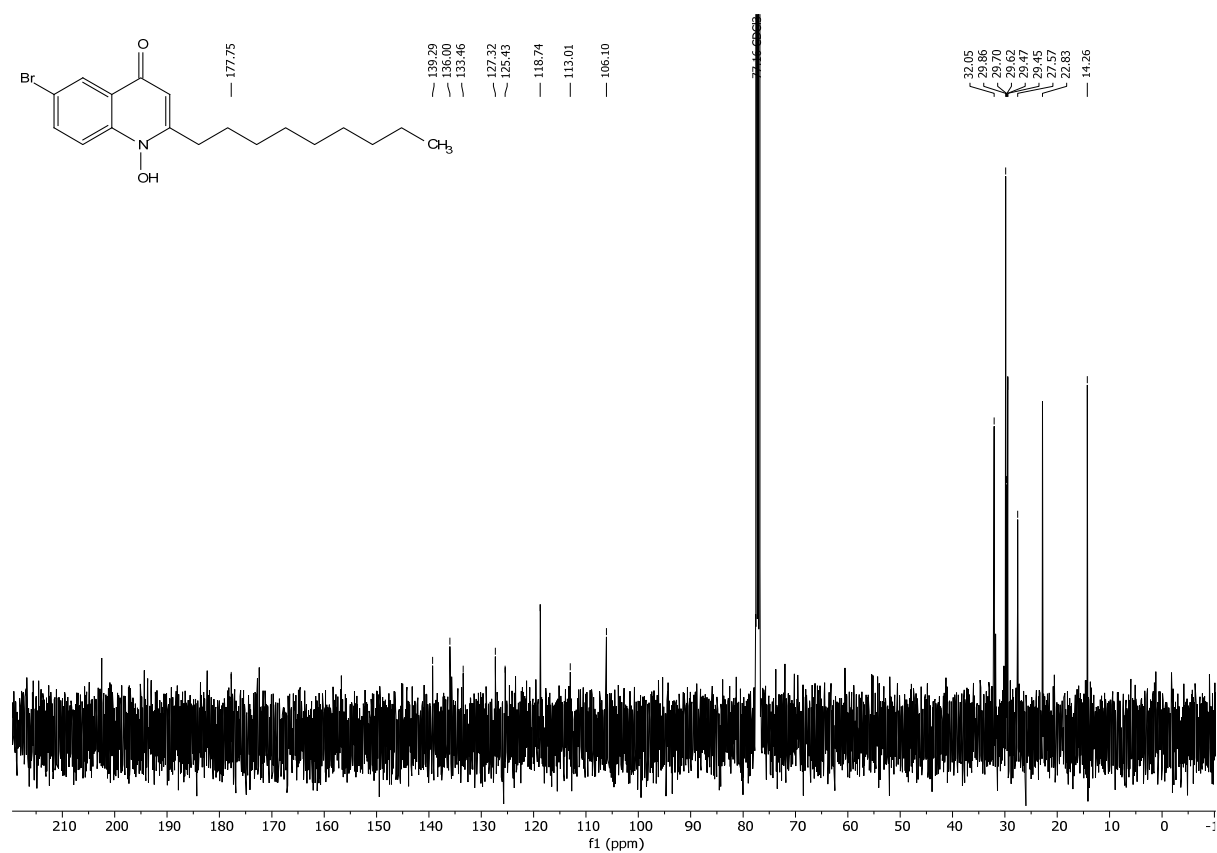

**Figure SA18.**  $^1\text{H}$ -NMR and  $^{13}\text{C}$ -NMR spectra of 6Br-NQNO in  $\text{CDCl}_3\text{-}d$ .

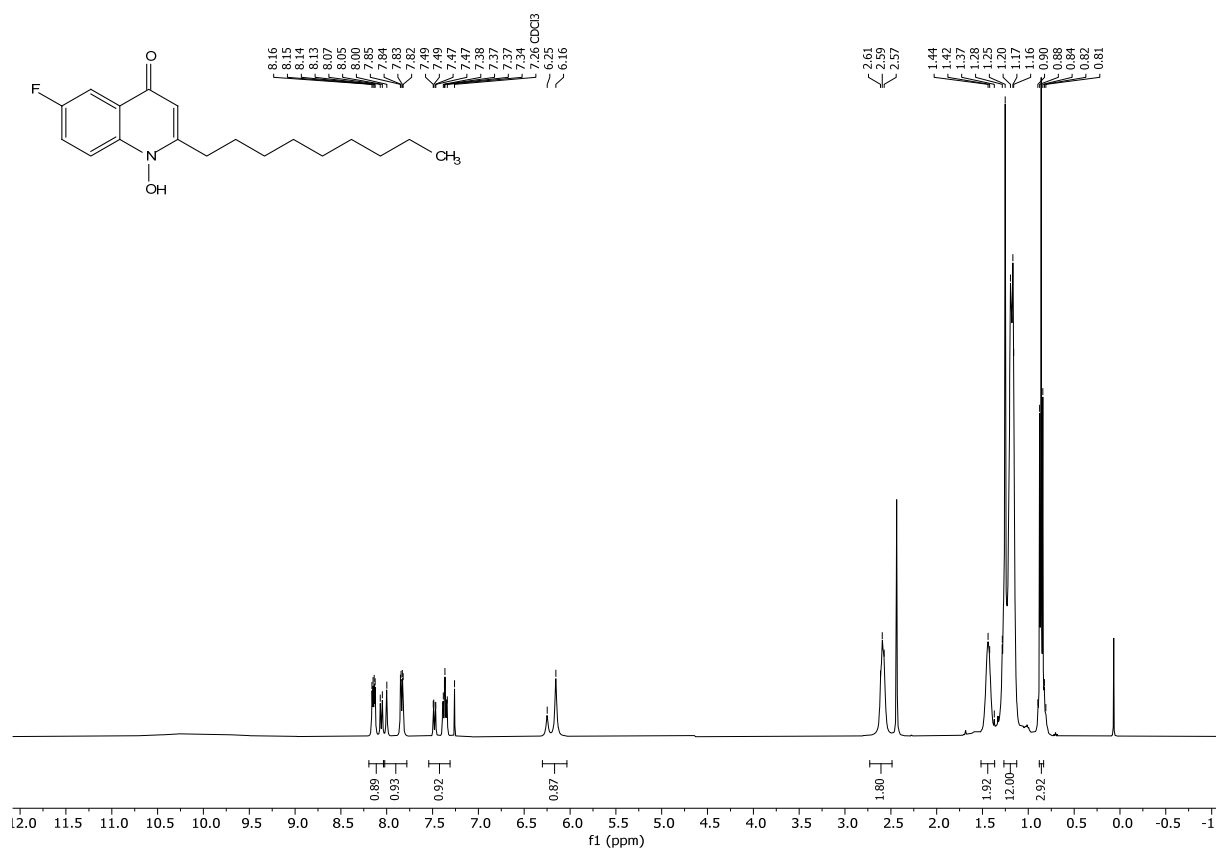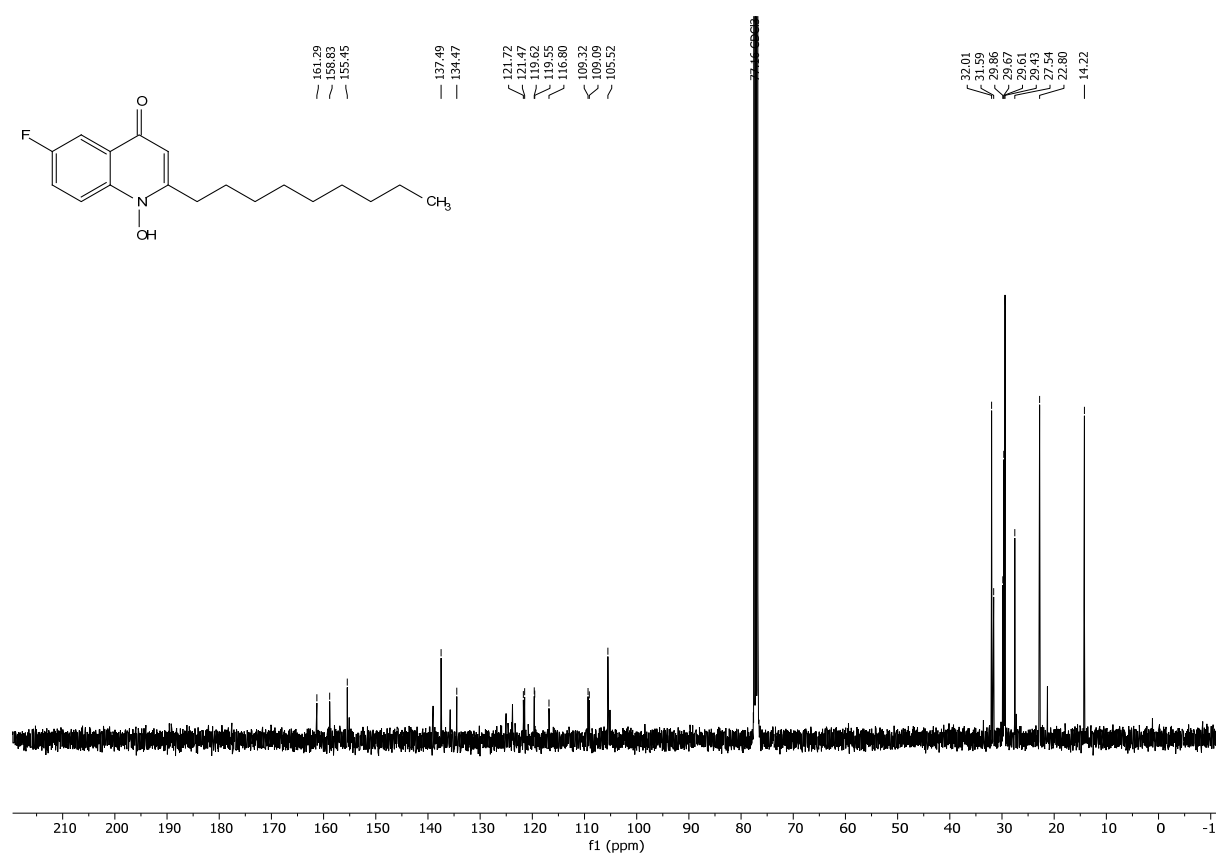

Figure SA19.  $^1\text{H}$ -NMR and  $^{13}\text{C}$ -NMR spectra of 6F-NQNO in  $\text{CDCl}_3\text{-}d$ .

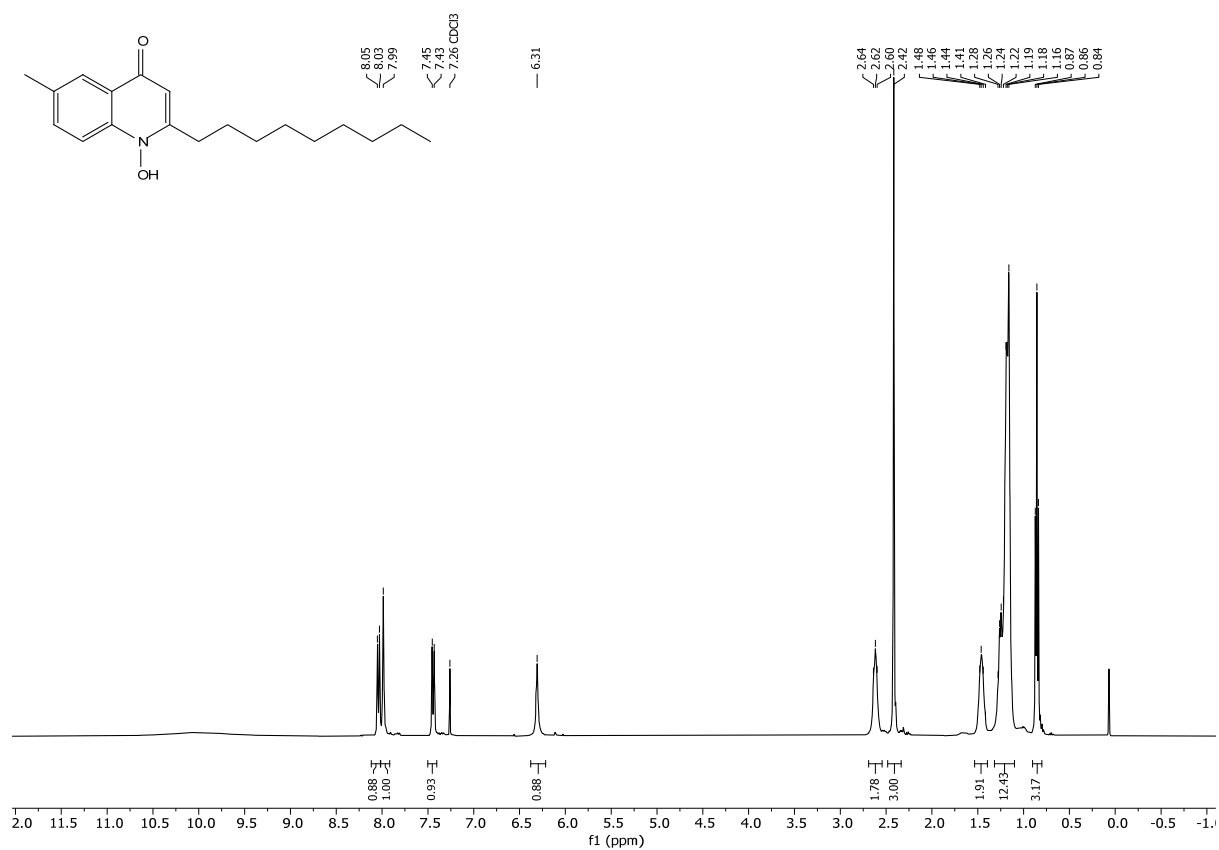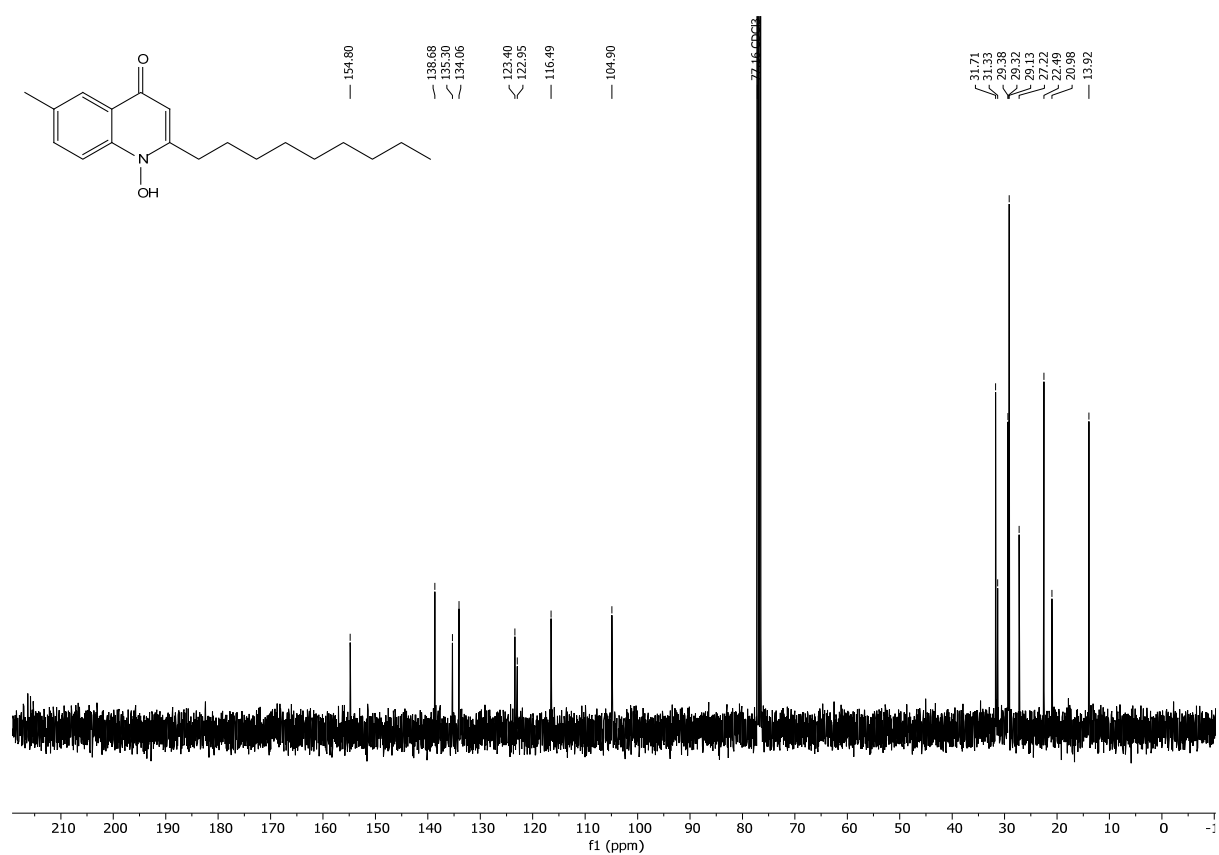

Figure SA20.  $^1\text{H}$ -NMR and  $^{13}\text{C}$ -NMR spectra of 6Me-NQNO in  $\text{CDCl}_3-d$ .

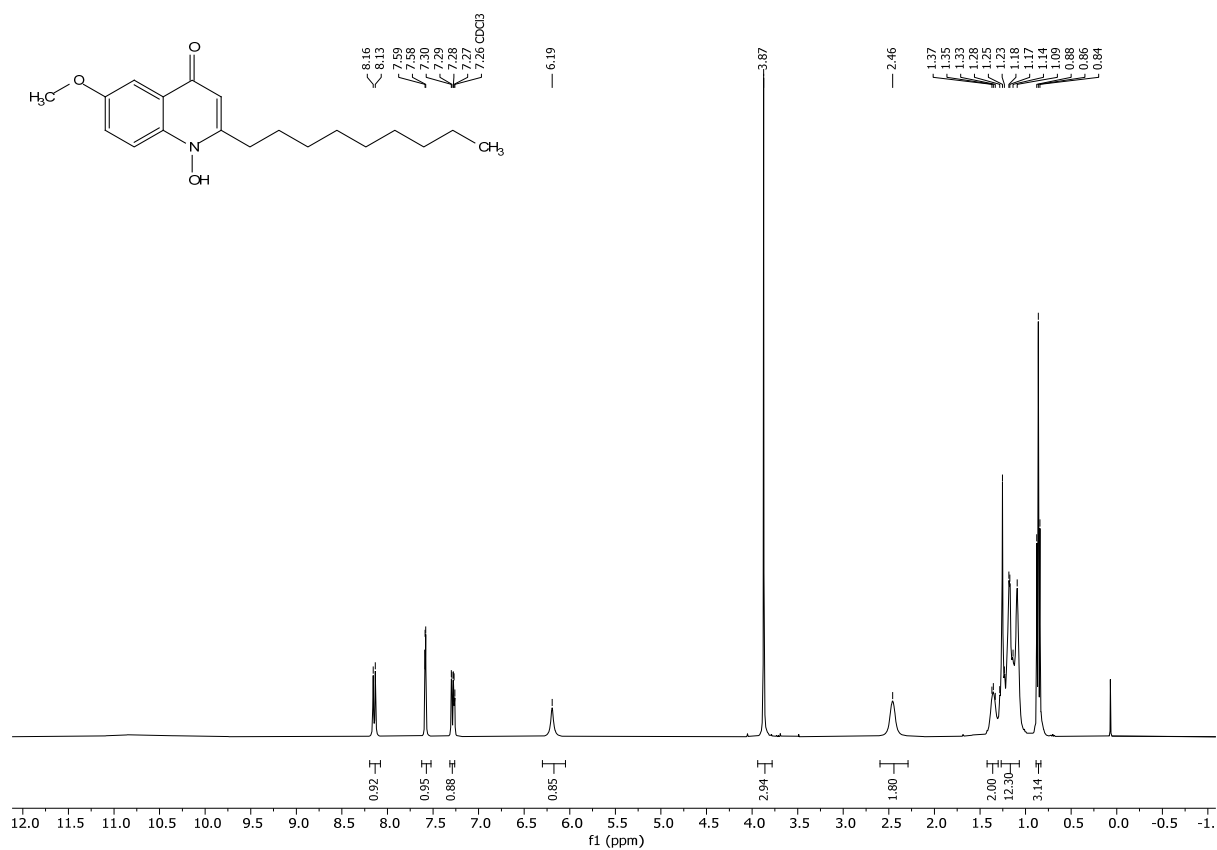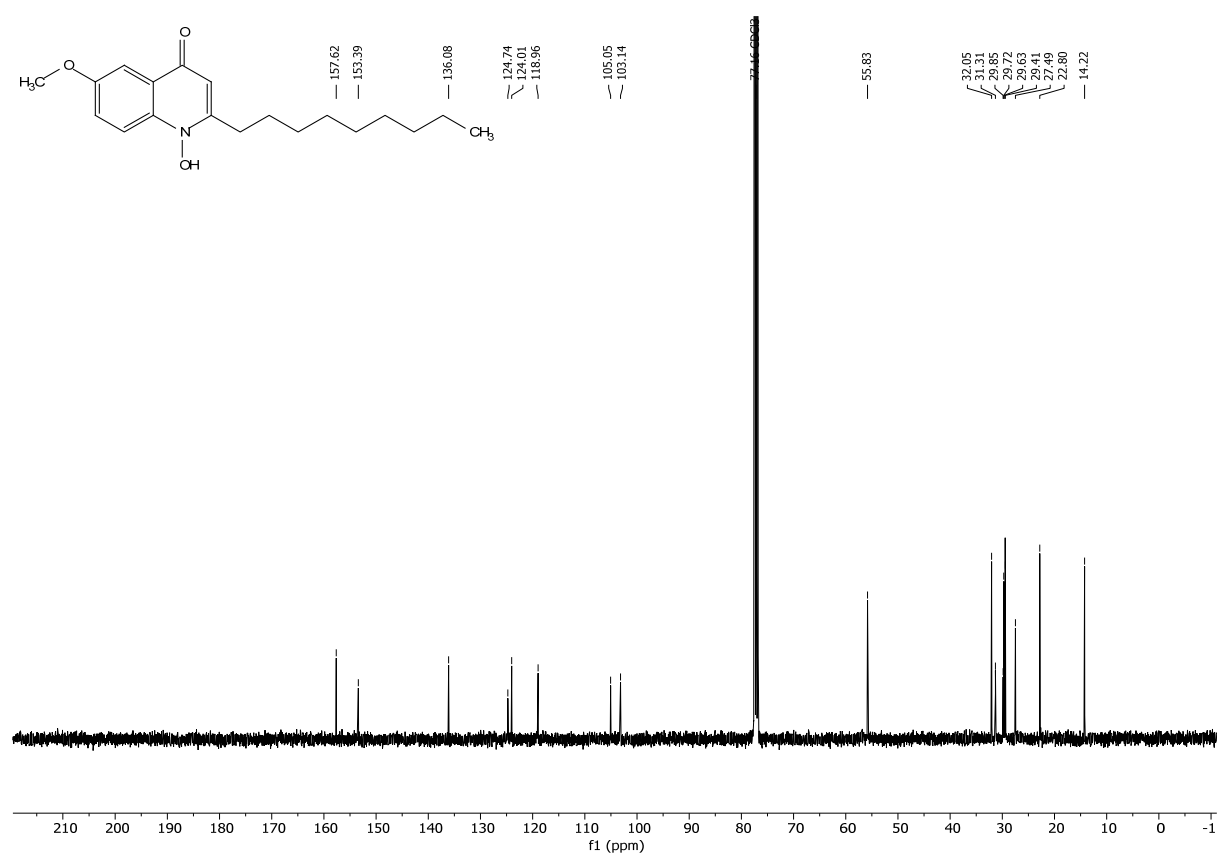

Figure SA21.  $^1\text{H}$ -NMR and  $^{13}\text{C}$ -NMR spectra of 6OMe-NQNO in  $\text{CDCl}_3-d$ .

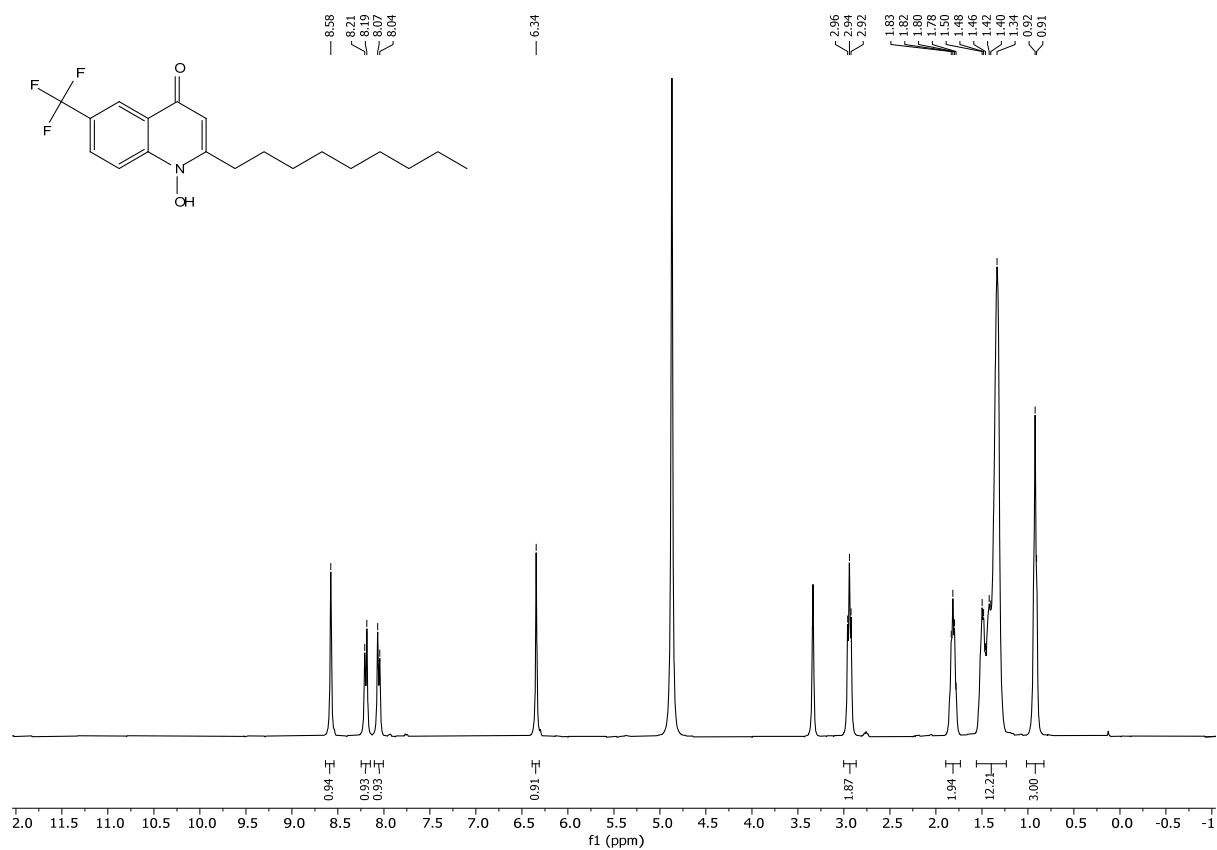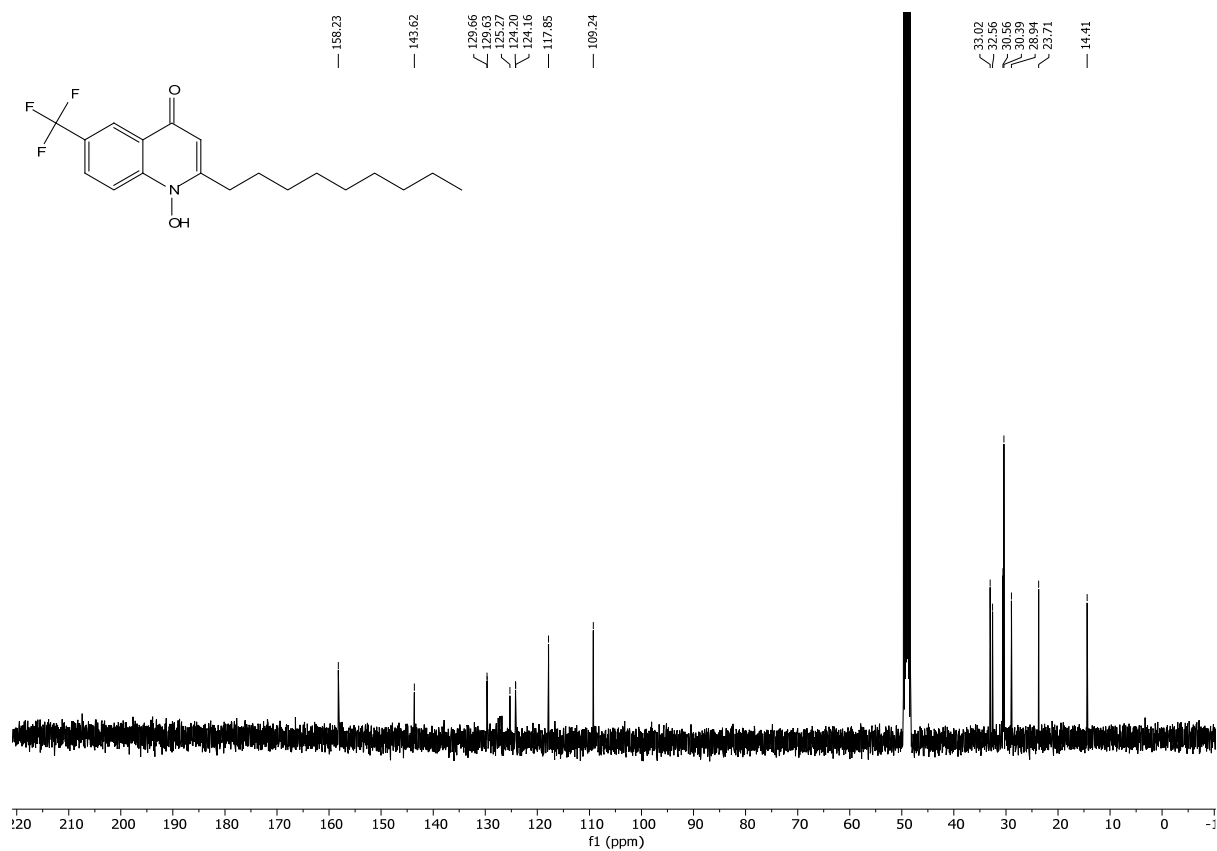

**Figure SA22.** <sup>1</sup>H-NMR and <sup>13</sup>C-NMR spectra of 6CF<sub>3</sub>-NQNO in MeOD-*d*<sub>3</sub>.

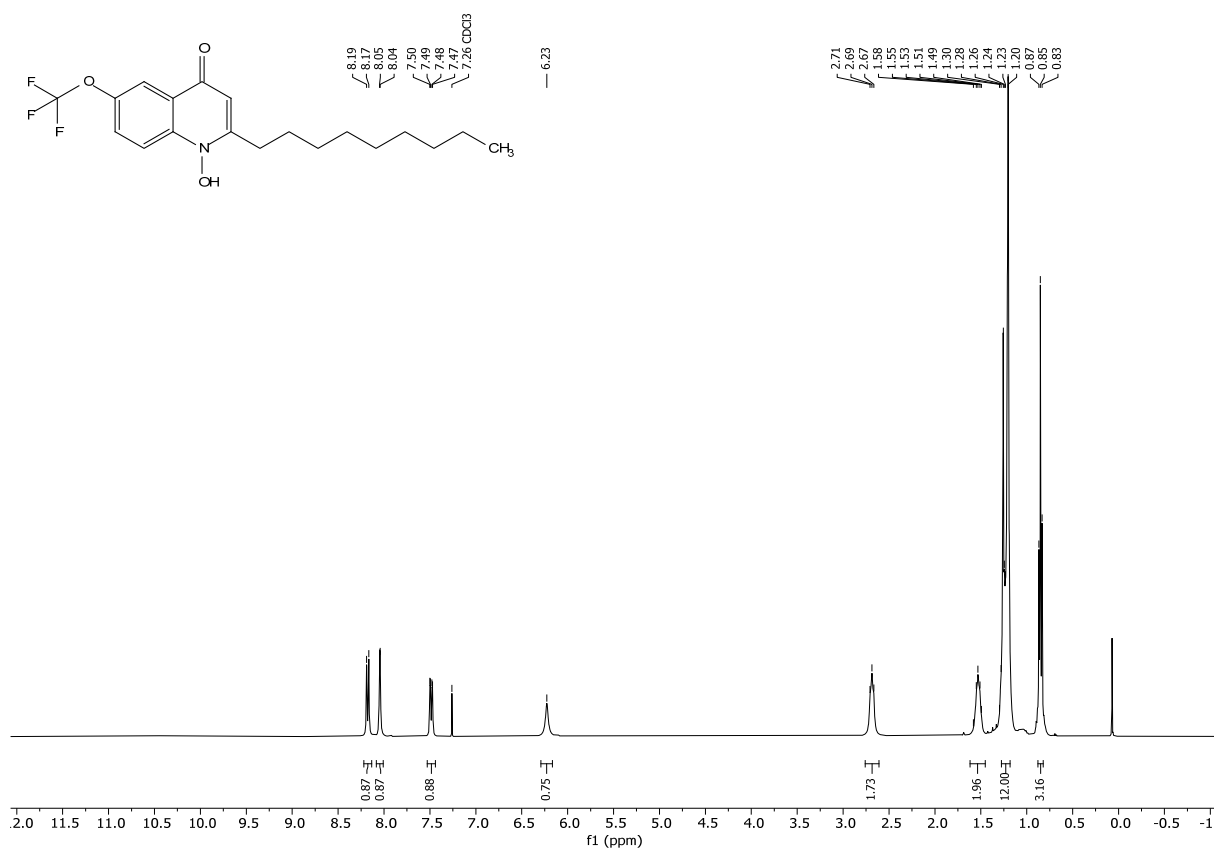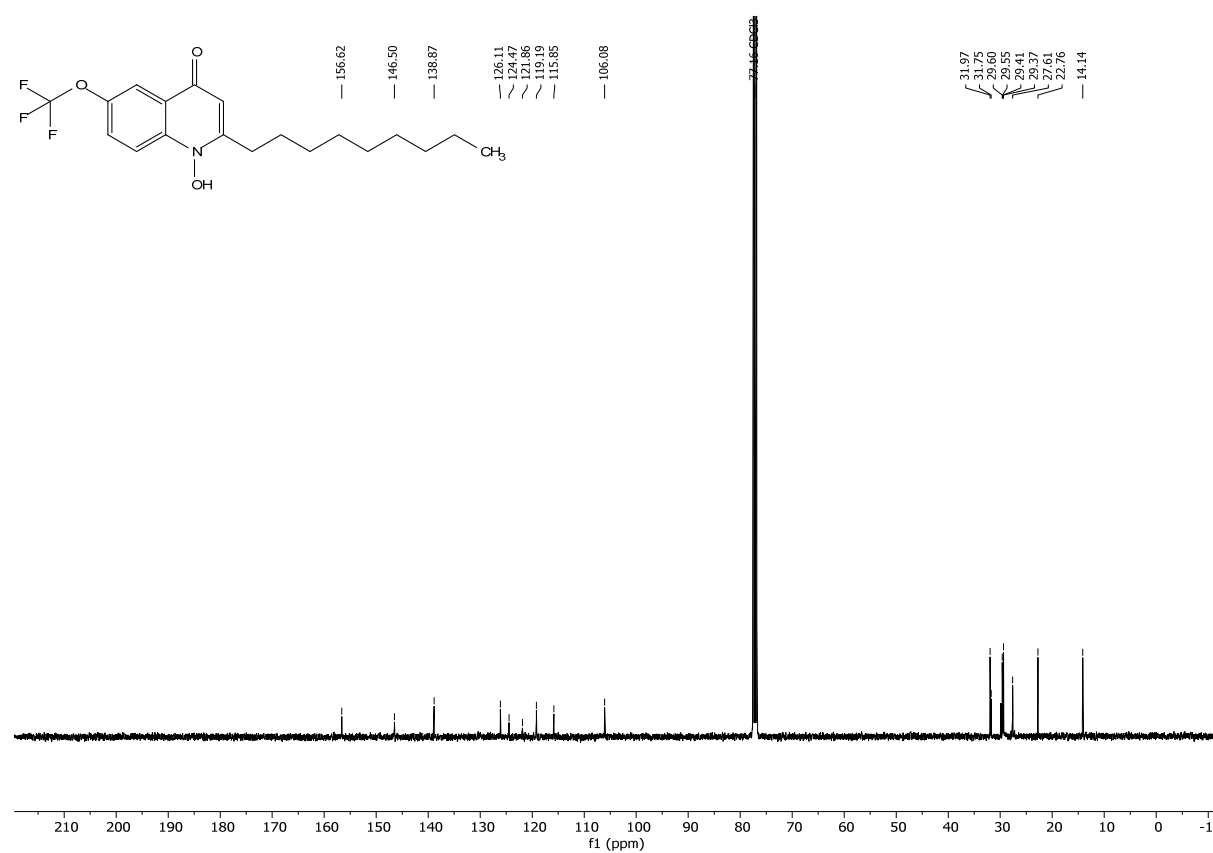

Figure SA23. <sup>1</sup>H-NMR and <sup>13</sup>C-NMR spectra of 6OCF<sub>3</sub>-NQNO in CDCl<sub>3</sub>-d.

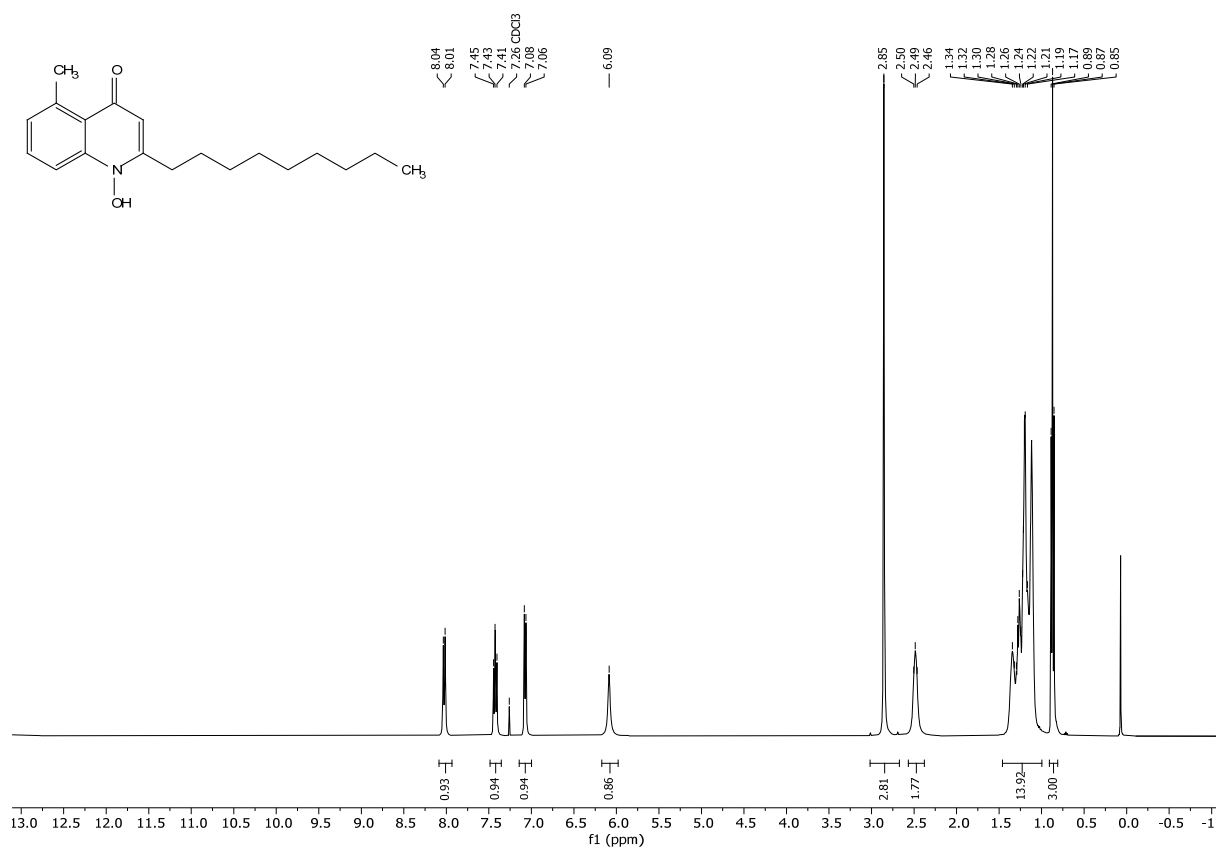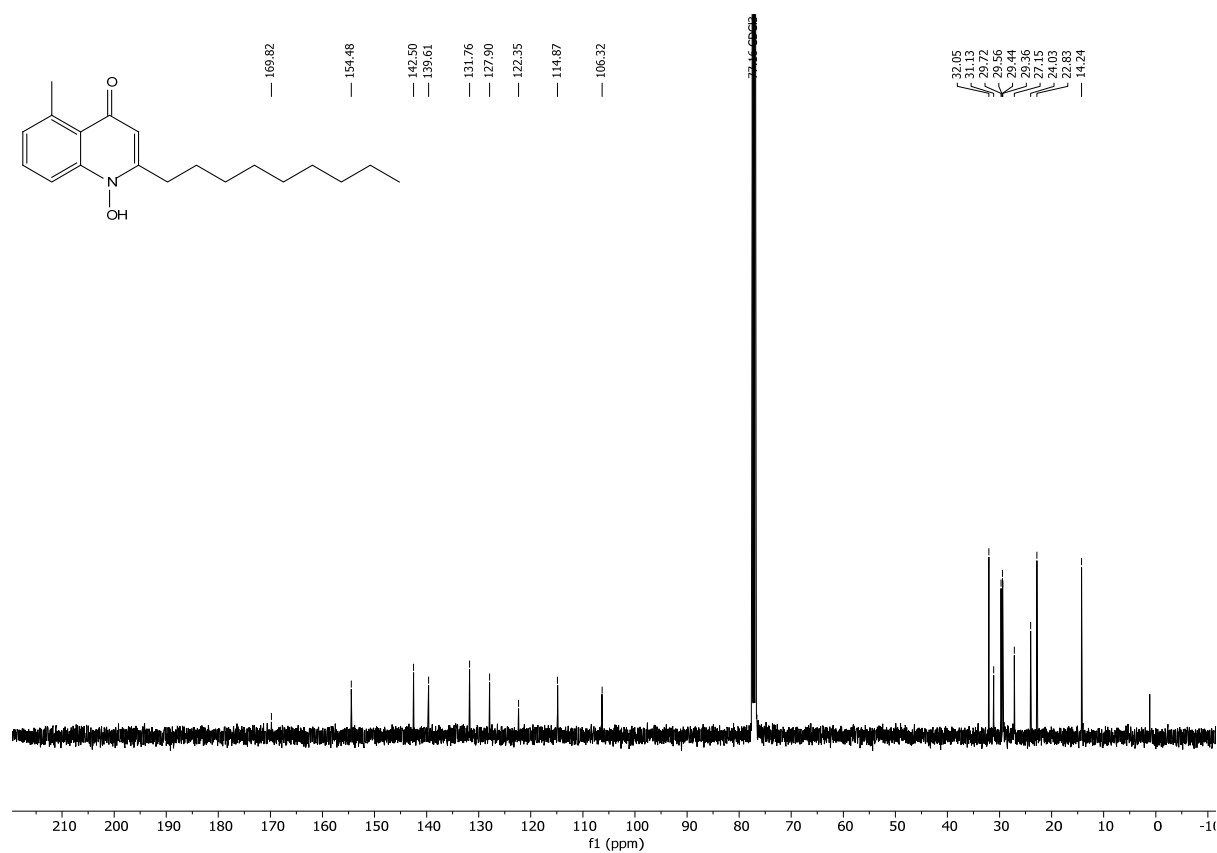

Figure SA24. <sup>1</sup>H-NMR and <sup>13</sup>C-NMR spectra of 5Me-NQNO in CDCl<sub>3</sub>-d.





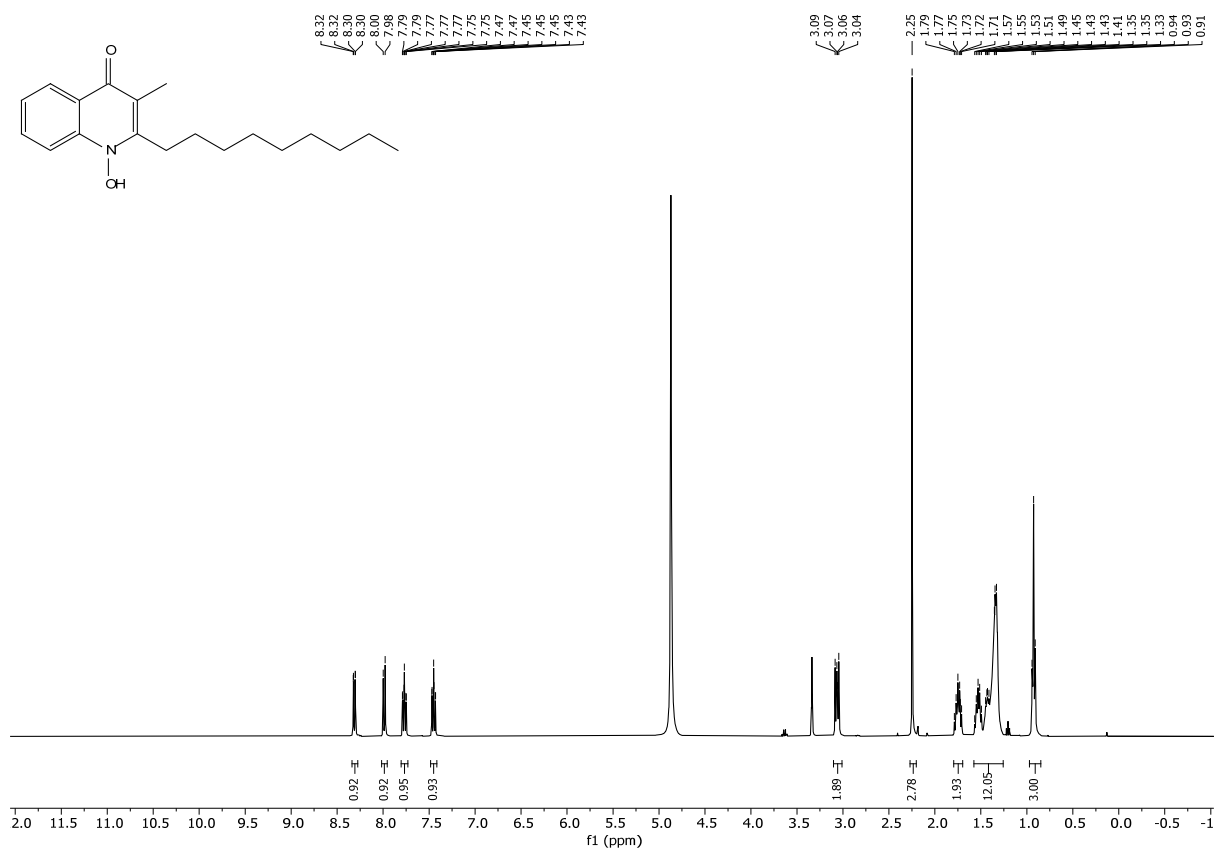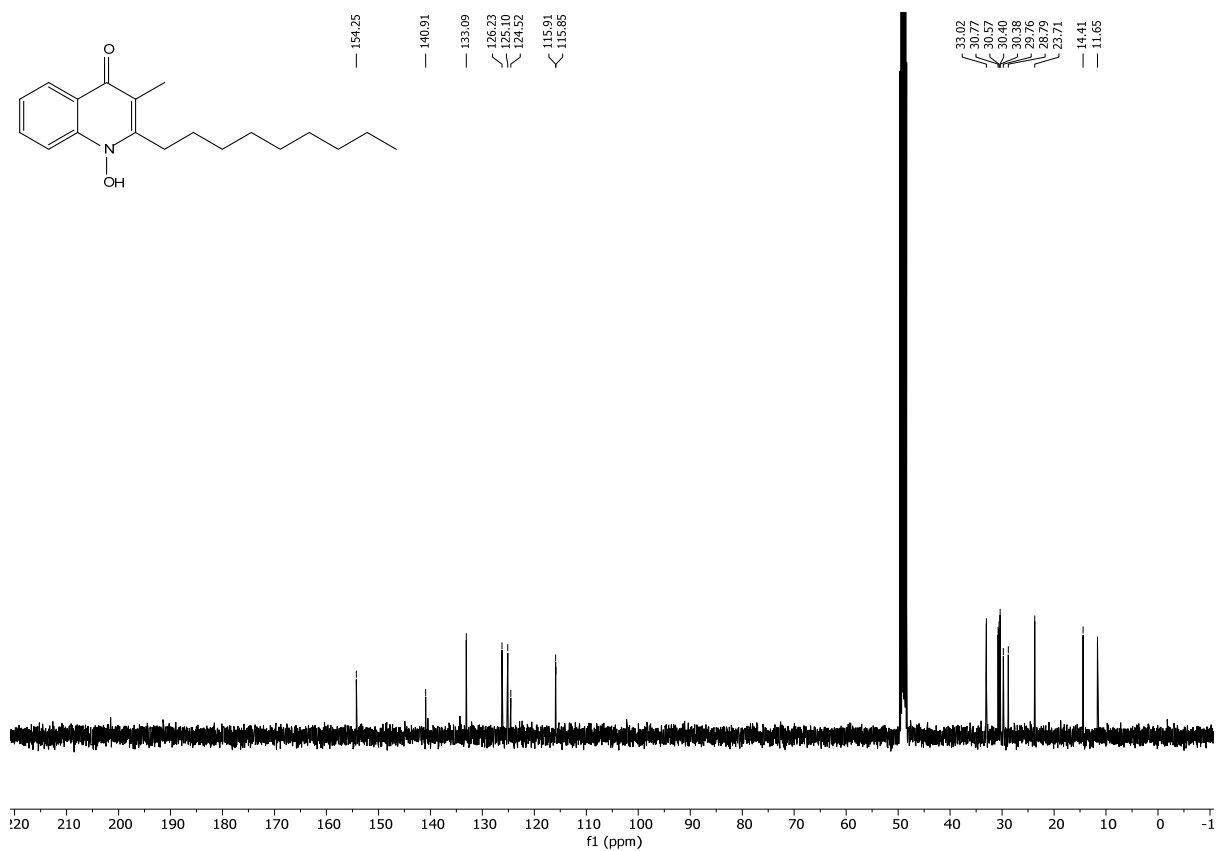

Figure SA26.  $^1\text{H}$ -NMR and  $^{13}\text{C}$ -NMR spectra of 3Me-NQNO in  $\text{MeOD-}d_3$ .

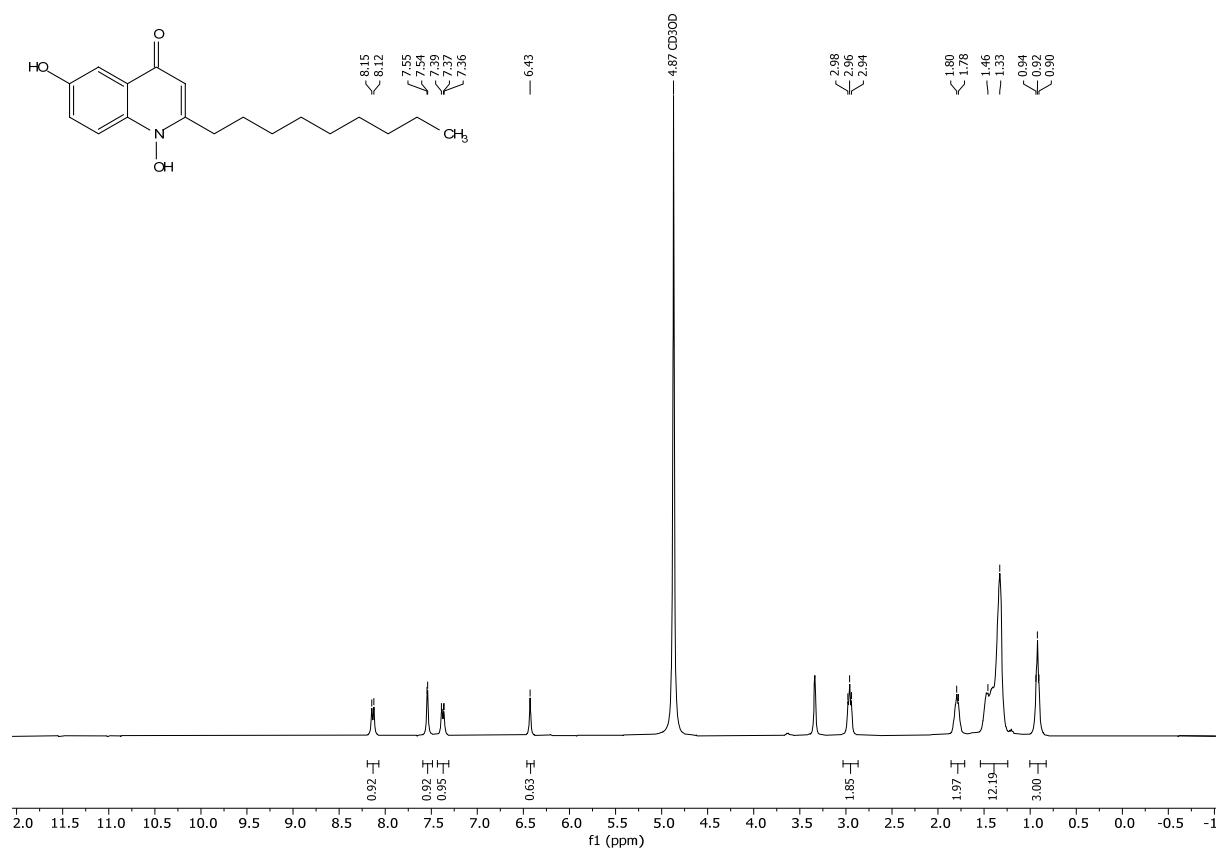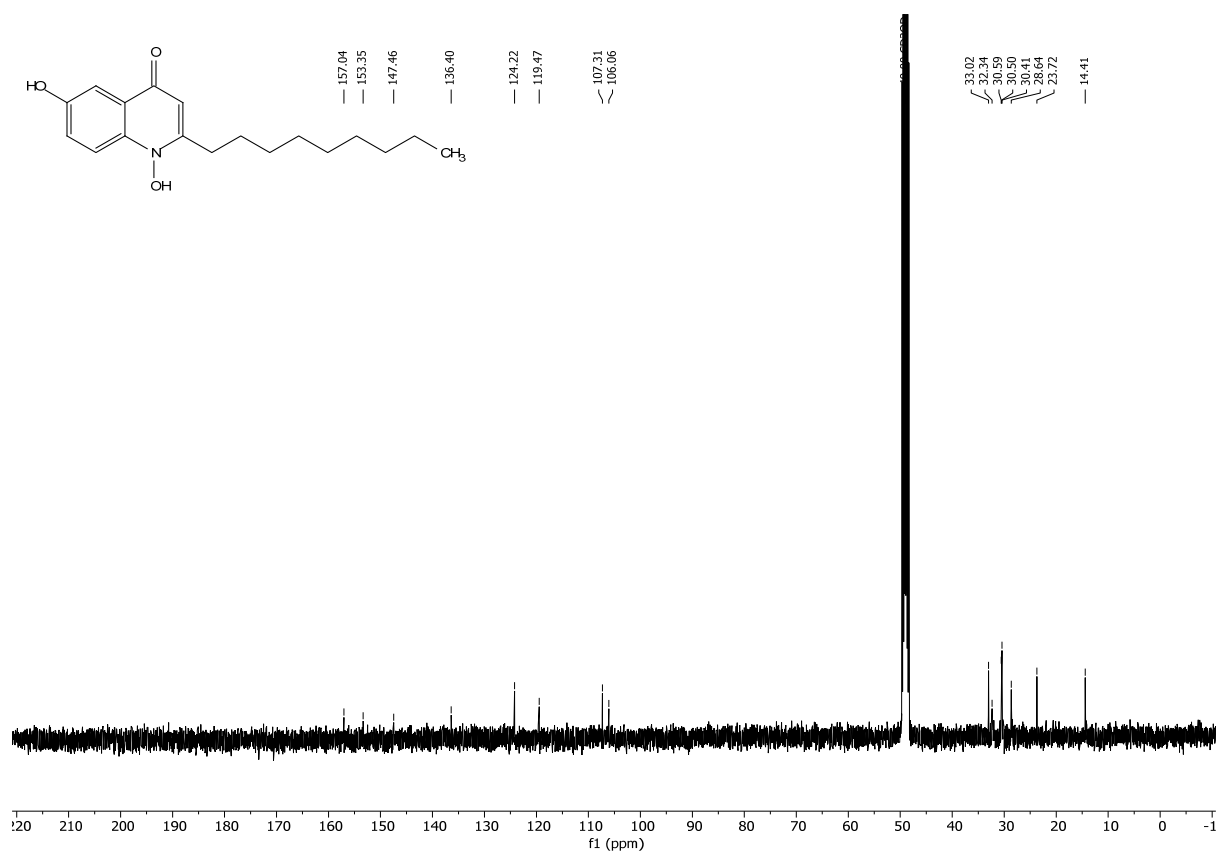

Figure SA27.  $^1\text{H}$ -NMR and  $^{13}\text{C}$ -NMR spectra of 6OH-NQNO in MeOD- $d_3$ .
